# Supplementary material for: Dual Target Ligands with 4-tert-Butylphenoxy Scaffold as Histamine H3 Receptor Antagonists and Monoamine Oxidase B Inhibitors
Source: MDPI journal article supplement (doi:10.3390/ijms21103411), 2020-05-12
Supplement: s1 [file s1]

## *Supplementary Materials S2*

# **Dual target ligands with 4-*tert*-butylphenoxy scaffold as histamine H<sub>3</sub> receptor antagonists and monoamine oxidase B inhibitors**

Dorota Łazewska<sup>1\*</sup>, Agnieszka Olejarz-Maciej<sup>1</sup>, David Reiner<sup>2</sup>, Maria Kaleta<sup>1</sup>, Gniewomir Latacz<sup>1</sup>, Małgorzata Zygmunt<sup>3</sup>, Agata Doroz-Płonka<sup>1</sup>, Tadeusz Karcz<sup>1</sup>, Annika Frank<sup>2</sup>, Holger Stark<sup>2</sup> and Katarzyna Kieć-Kononowicz<sup>1\*</sup>

<sup>1</sup> Department of Technology and Biotechnology of Drugs, Jagiellonian University Medical College, 9 Medyczna Str, 30-688 Kraków, Poland; [agnieszka.olejarz@uj.edu.pl](mailto:agnieszka.olejarz@uj.edu.pl) (A.O.-M.); [maria.kaleta@uj.edu.pl](mailto:maria.kaleta@uj.edu.pl) (M.K.); [glatacz@cm-uj.krakow.pl](mailto:glatacz@cm-uj.krakow.pl) (G.L.); [a.doroz-plonka@uj.edu.pl](mailto:a.doroz-plonka@uj.edu.pl) (A.D.-P.); [t.karcz@uj.edu.pl](mailto:t.karcz@uj.edu.pl) (T.K.); [mfkonono@cyf-kr.edu.pl](mailto:mfkonono@cyf-kr.edu.pl) (K.K.-K.)

<sup>2</sup> Institute of Pharmaceutical and Medicinal Chemistry, Heinrich Heine University Düsseldorf, Universitätsstr. 1, 40225 Düsseldorf, Germany; [david.reiner@hhu.de](mailto:david.reiner@hhu.de) (D.R.); [a.frank@hhu.de](mailto:a.frank@hhu.de) (A.F.); [stark@hhu.de](mailto:stark@hhu.de) (H.S.)

<sup>3</sup> Department of Pharmacodynamics, Jagiellonian University Medical College, 9 Medyczna Str, 30-688, Kraków, Poland; [malgorzata.zygmunt@uj.edu.pl](mailto:malgorzata.zygmunt@uj.edu.pl) (M.Z.)

\* Correspondence: [dlazewska@cm-uj.krakow.pl](mailto:dlazewska@cm-uj.krakow.pl) (D.L.); [mfkonono@cyf-kr.edu.pl](mailto:mfkonono@cyf-kr.edu.pl) (K.K.-K.)

### hMAO B Kinetic studies

The  $\alpha$  values for different modes of reversible inhibition as well as their diagnostic signature on double-reciprocal plot are shown in Table S1. The  $\alpha$  value for compound **9** was calculated by GraphPad Prism software from the nonlinear regression curves using following equation for mixed-model of inhibition:

$$v = V_{\max}*[S] / [S]*(1+ [I]/ \alpha K_i) + K_M*(1+ [I]/K_i) \quad (1)$$

$v$  – velocity of enzyme reaction.  $V_{\max}$  - maximum velocity (at infinite substrate concentration);  $K_i$  – dissociation constant for Enzyme-Inhibitor complex (in the enzymology literature other symbols can be used such as:  $K_i$ ,  $K_{ii}$ ,  $K_{EI}$  etc.);  $\alpha K_i$  – dissociation constant for Enzyme-Substrate-Inhibitor complex (in the literature also under the symbols:  $K_i'$ ,  $K_{is}$  and  $K_{ES}$ );  $K_M$  – Michaelis-Menten constant;  $[I]$  – concentration of the inhibitor;  $[S]$  – concentration of the substrate [Ref S1].

**Table S1.** Relation between inhibition modality,  $\alpha$  value, and diagnostic signature on the double-reciprocal plots (i.e Lineweaver-Burk plot) [S2].

| $\alpha$                                | Inhibition modality                                                                                                                          | Diagnostic signature on double-reciprocal plot                |
|-----------------------------------------|----------------------------------------------------------------------------------------------------------------------------------------------|---------------------------------------------------------------|
|                                         | <b>noncompetitive</b>                                                                                                                        |                                                               |
| $\alpha = 1$                            | (inhibitor binds to free enzyme and enzyme-substrate complex with equal affinity)                                                            | lines converge at the x-axis                                  |
|                                         | <b>mixed mode inhibitor</b>                                                                                                                  |                                                               |
| $\alpha > 1$                            | (inhibitor can bind to free enzyme and enzyme-substrate complex unequally), inhibitor's affinity is higher for free enzyme                   | lines converge to the left of the y-axis and above the x-axis |
|                                         | <b>mixed mode inhibitor</b>                                                                                                                  |                                                               |
| $\alpha < 1$                            | (inhibitor can bind to free enzyme and enzyme-substrate complex unequally), inhibitor's affinity is higher for the enzyme-substrate complex) | lines converge to the left of the y-axis and below the x-axis |
|                                         | <b>competitive</b>                                                                                                                           |                                                               |
| $\alpha \rightarrow \infty$             | (inhibitor and substrate compete for the same site of binding)                                                                               | lines converge at the y-axis                                  |
|                                         | <b>uncompetitive</b>                                                                                                                         |                                                               |
| $\alpha \rightarrow 0$ and $\alpha > 0$ | (inhibitor binds only to the enzyme-substrate complex)                                                                                       | parallel lines                                                |

#### References:

- S1. Copeland, R.A. *Enzymes: A Practical Introduction to Structure, Mechanism, and Data Analysis.*; 2nd ed.; Wiley-VCH: New York / Chichester / Weinheim / Brisbane / Singapore / Toronto, 2000; ISBN 0-471-22063-9.
- S2. Copeland, R.A. *Evaluation of Enzyme Inhibitors in Drug Discovery. A Guide for Medicinal Chemists and Pharmacologists*, John Wiley & Sons, Inc., Hoboken, New Jersey, **2005**.
