# Supplementary material for: Dual Target Ligands with 4-tert-Butylphenoxy Scaffold as Histamine H3 Receptor Antagonists and Monoamine Oxidase B Inhibitors
Source: MDPI journal article supplement (doi:10.3390/ijms21103411), 2020-05-12
Supplement: s1 [file s1]

## Dual target ligands with 4-*tert*-butylphenoxy scaffold as histamine H<sub>3</sub> receptor antagonists and monoamine oxidase B inhibitors

Dorota Łażewska<sup>1\*</sup>, Agnieszka Olejarz-Maciej<sup>1</sup>, David Reiner<sup>2</sup>, Maria Kaleta<sup>1</sup>, Gniewomir Latacz<sup>1</sup>, Małgorzata Zygmunt<sup>3</sup>, Agata Doroz-Płonka<sup>1</sup>, Tadeusz Karcz<sup>1</sup>, Annika Frank<sup>2</sup>, Holger Stark<sup>2</sup> and Katarzyna Kieć-Kononowicz<sup>1\*</sup>

<sup>1</sup>Department of Technology and Biotechnology of Drugs, Jagiellonian University Medical College, 9 Medyczna str, 30-688 Kraków, Poland; [agnieszka.olejarz@uj.edu.pl](mailto:agnieszka.olejarz@uj.edu.pl) (A.O.-M.); [maria.kaleta@uj.edu.pl](mailto:maria.kaleta@uj.edu.pl) (M.K.); [glatacz@cm-uj.krakow.pl](mailto:glatacz@cm-uj.krakow.pl) (G.L.); [a.doroz-plonka@uj.edu.pl](mailto:a.doroz-plonka@uj.edu.pl) (A.D.-P.); [t.karcz@uj.edu.pl](mailto:t.karcz@uj.edu.pl) (T.K.); [mfkonono@cyf-kr.edu.pl](mailto:mfkonono@cyf-kr.edu.pl) (K.K.-K.)

<sup>2</sup>Institute of Pharmaceutical and Medicinal Chemistry, Heinrich Heine University Düsseldorf, Universitaetsstr. 1, 40225 Duesseldorf, Germany; [david.reiner@hhu.de](mailto:david.reiner@hhu.de) (D.R.); [a.frank@hhu.de](mailto:a.frank@hhu.de) (A.F.); [stark@hhu.de](mailto:stark@hhu.de) (H.S.)

<sup>3</sup>Department of Pharmacodynamics, Jagiellonian University Medical College, 9 Medyczna str, 30-688, Kraków, Poland; [malgorzata.zygmunt@uj.edu.pl](mailto:malgorzata.zygmunt@uj.edu.pl) (M.Z.)

\*Correspondence: [dlazewska@cm-uj.krakow.pl](mailto:dlazewska@cm-uj.krakow.pl) (D.Ł.), [mfkono@cyf-kr.edu.pl](mailto:mfkono@cyf-kr.edu.pl) (K.K.-K.)

<sup>1</sup>H NMR and <sup>13</sup>C NMR data of synthesized compounds

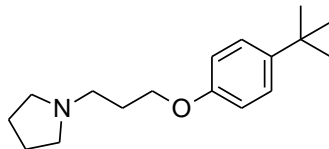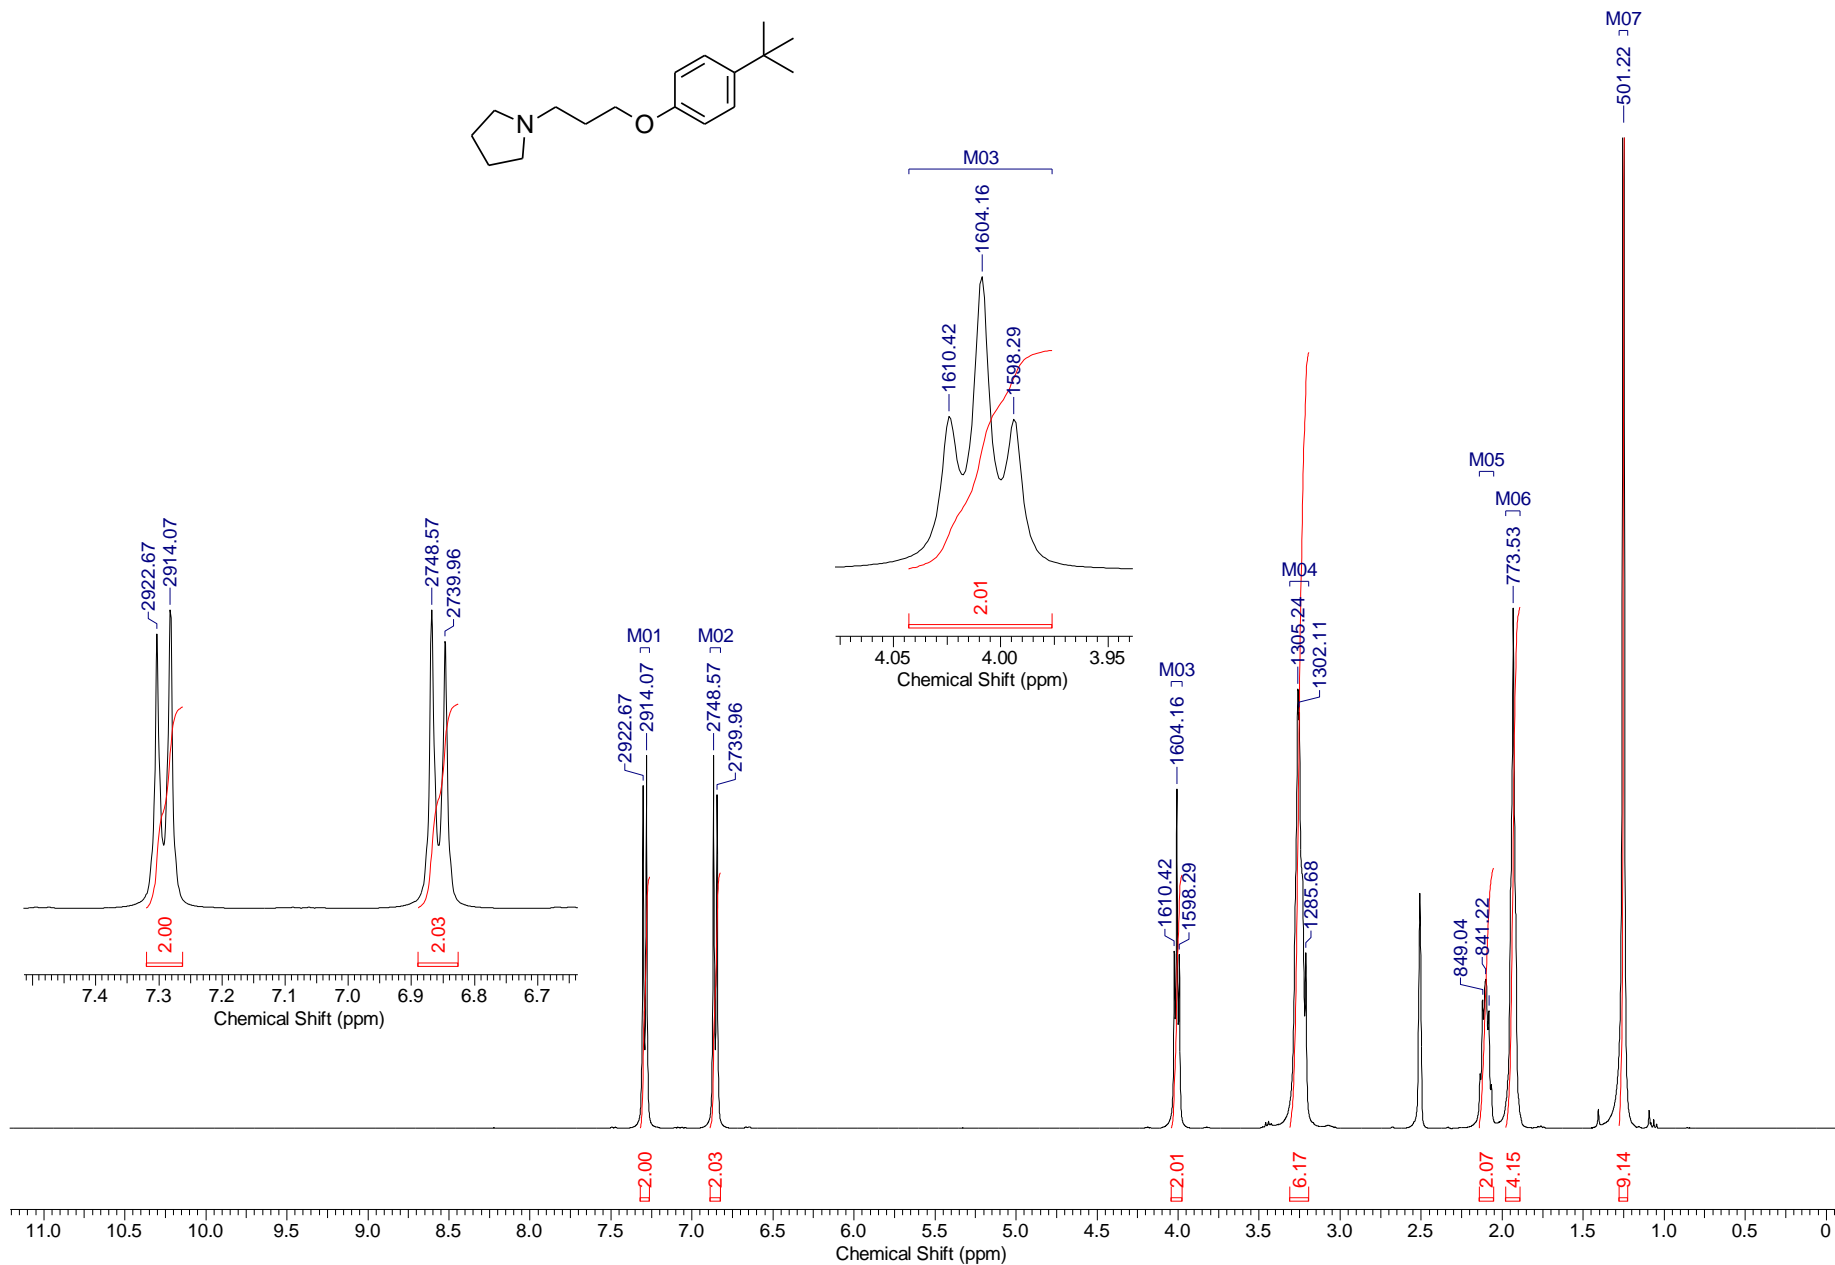

**Fig S1.**  $^1\text{H}$  NMR spectrum of **5**

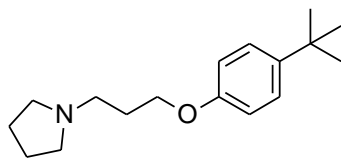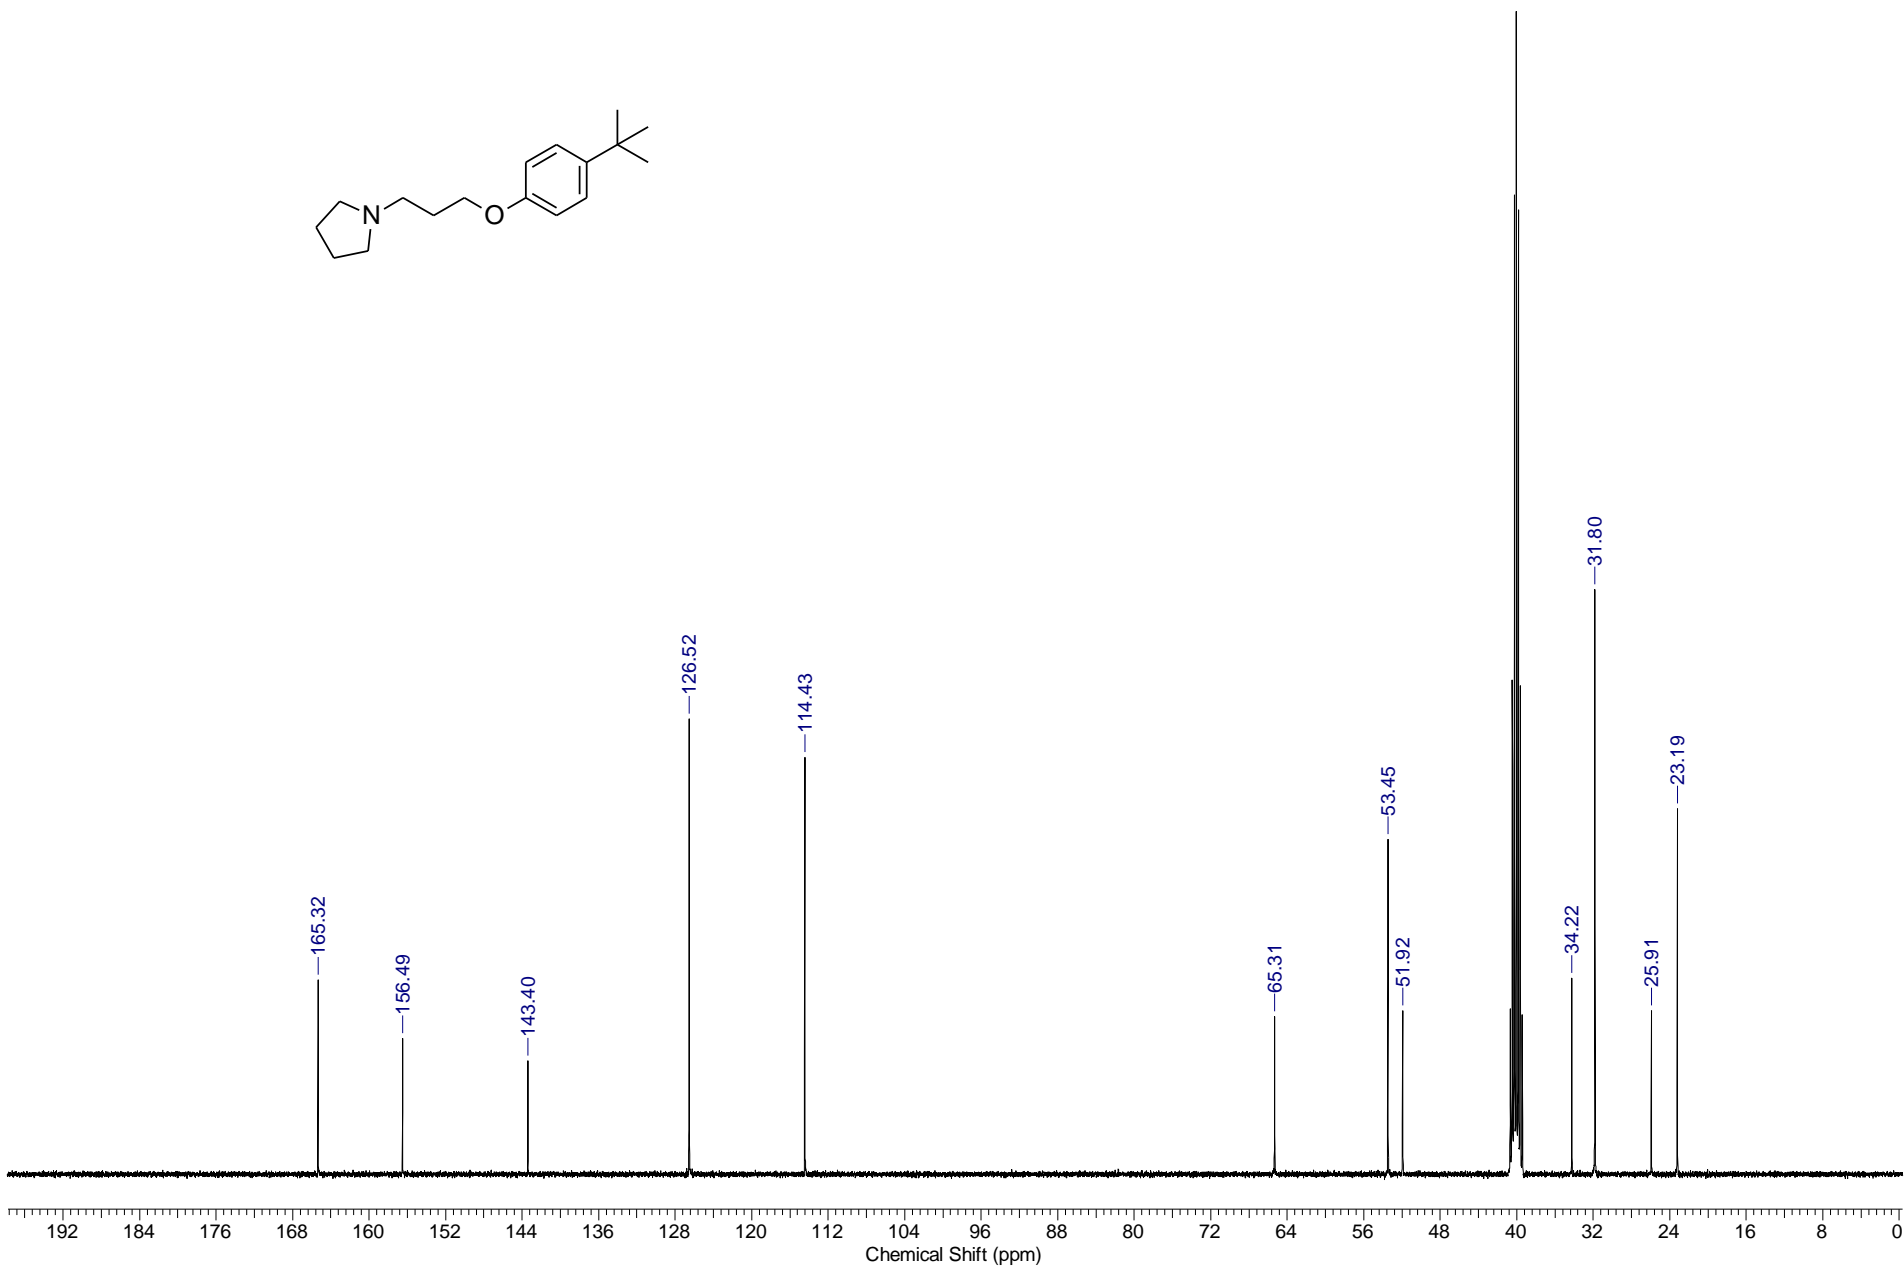

**Fig S2.**  $^{13}\text{C}$  NMR spectrum of **5**

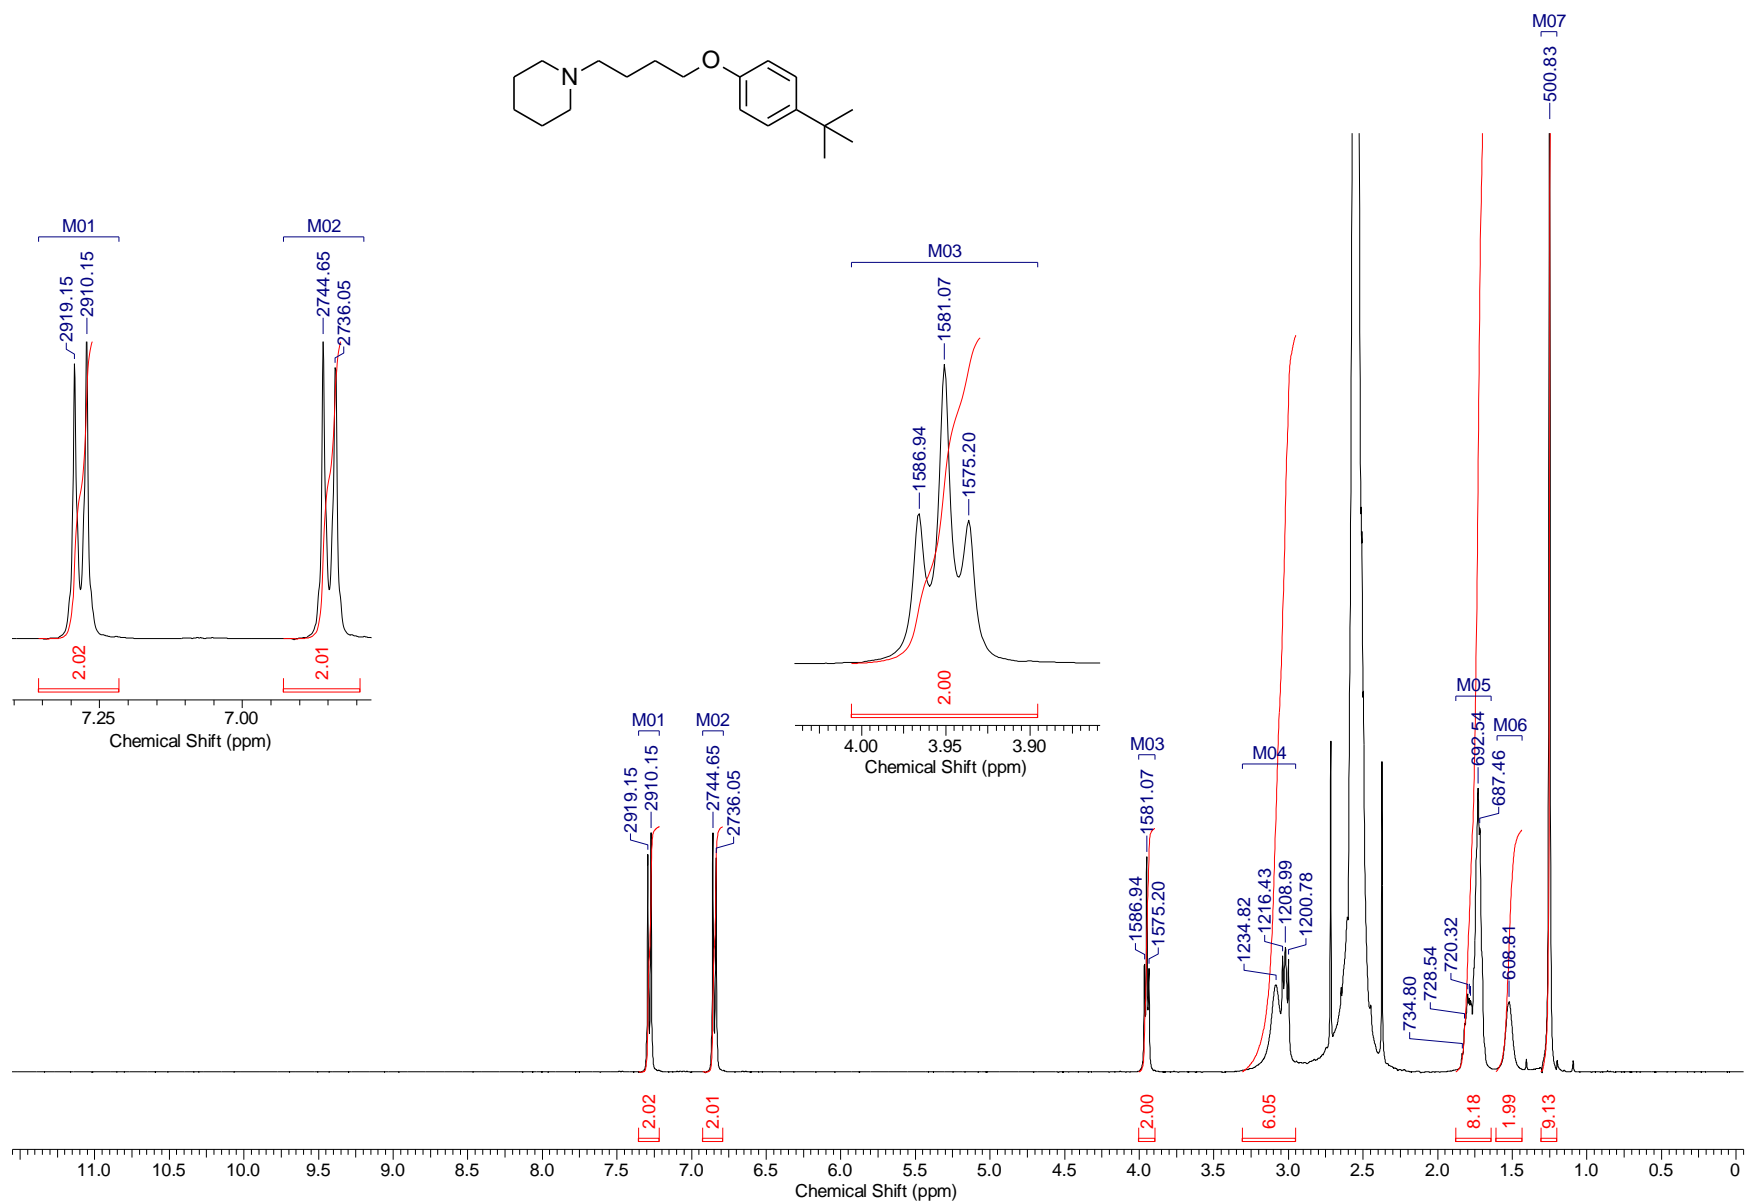

**Fig S3.** <sup>1</sup>H NMR spectrum of 6

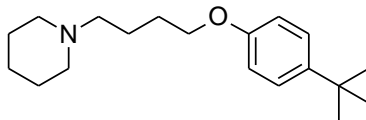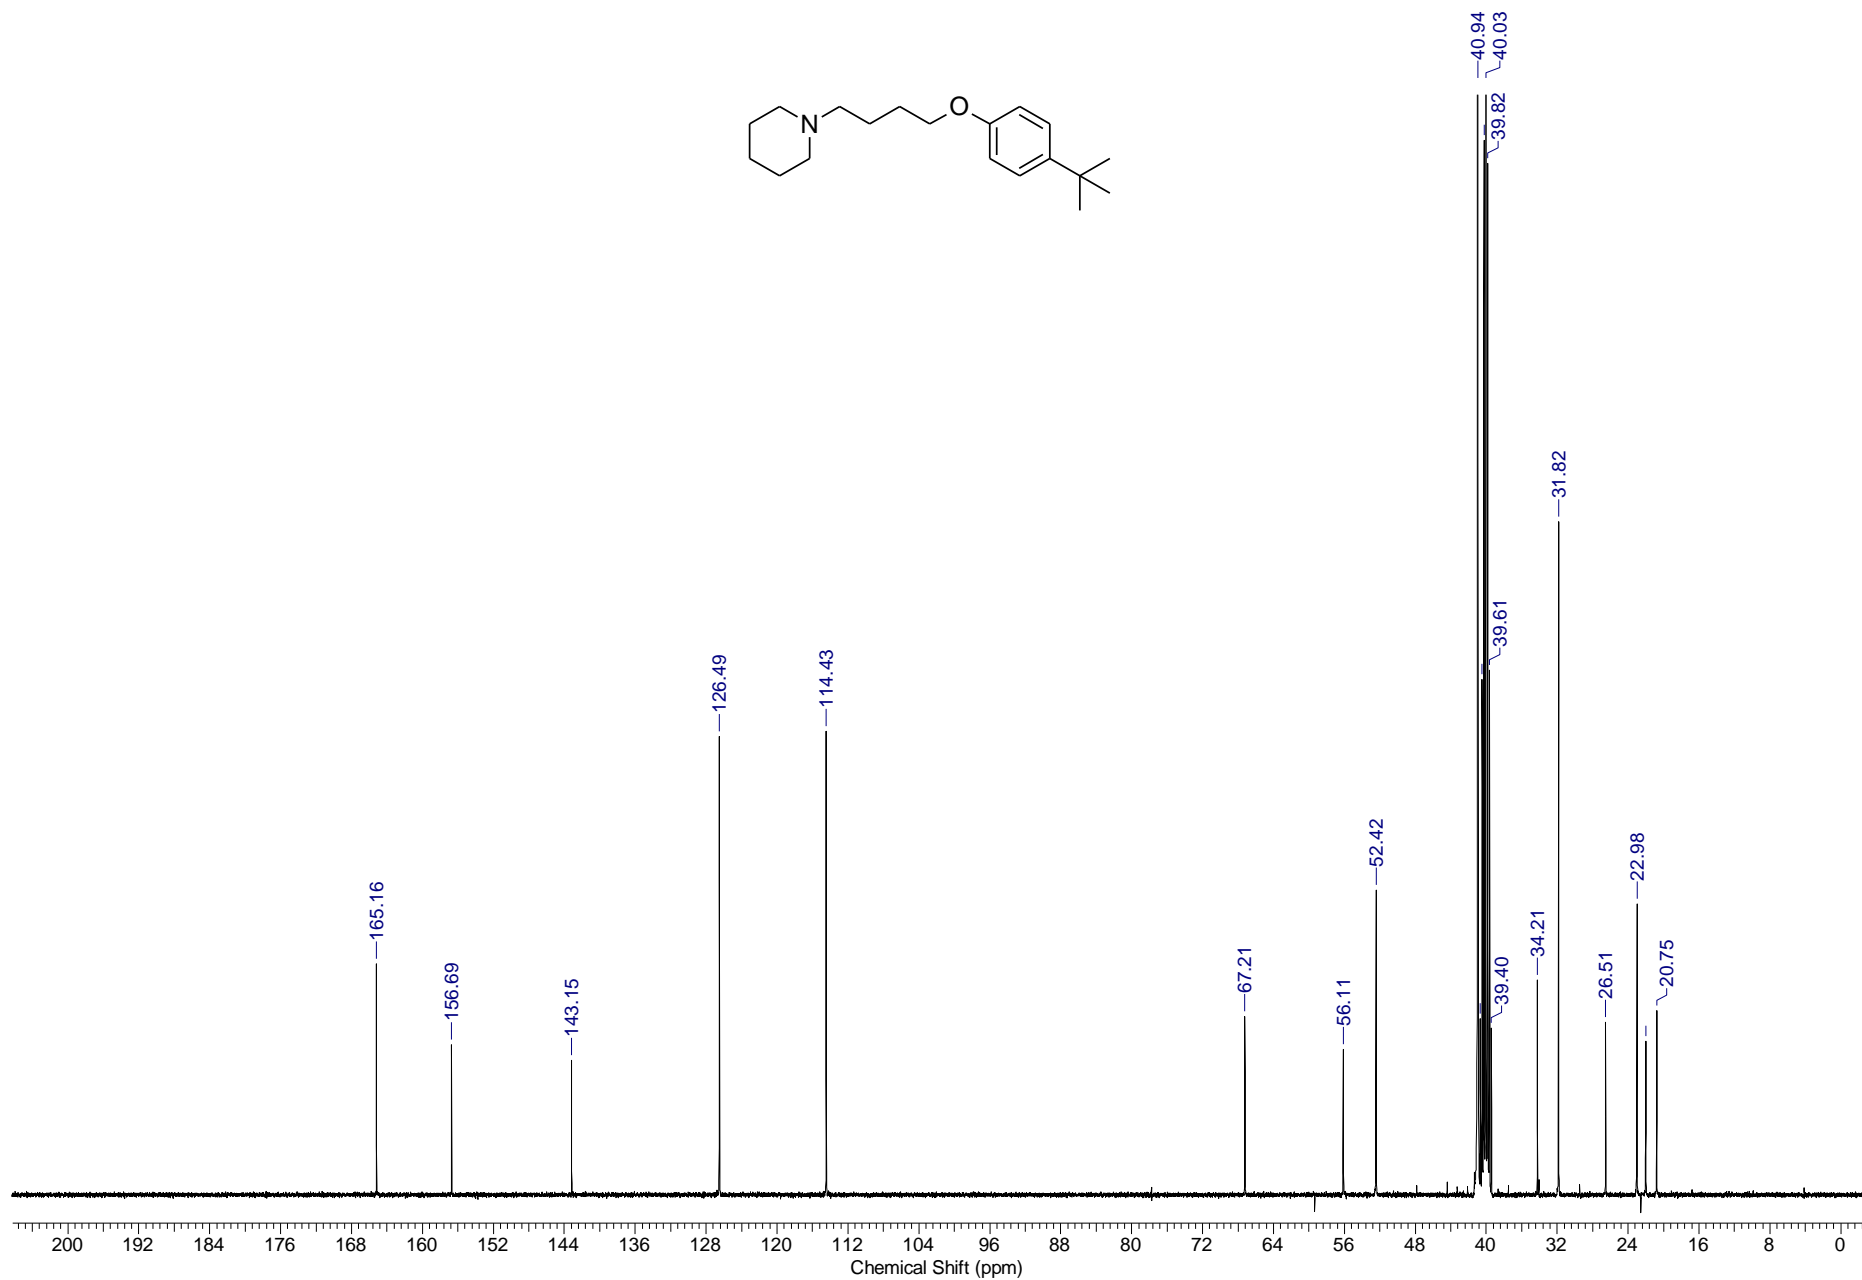

**Fig S4.** <sup>13</sup>C NMR spectrum of **6**

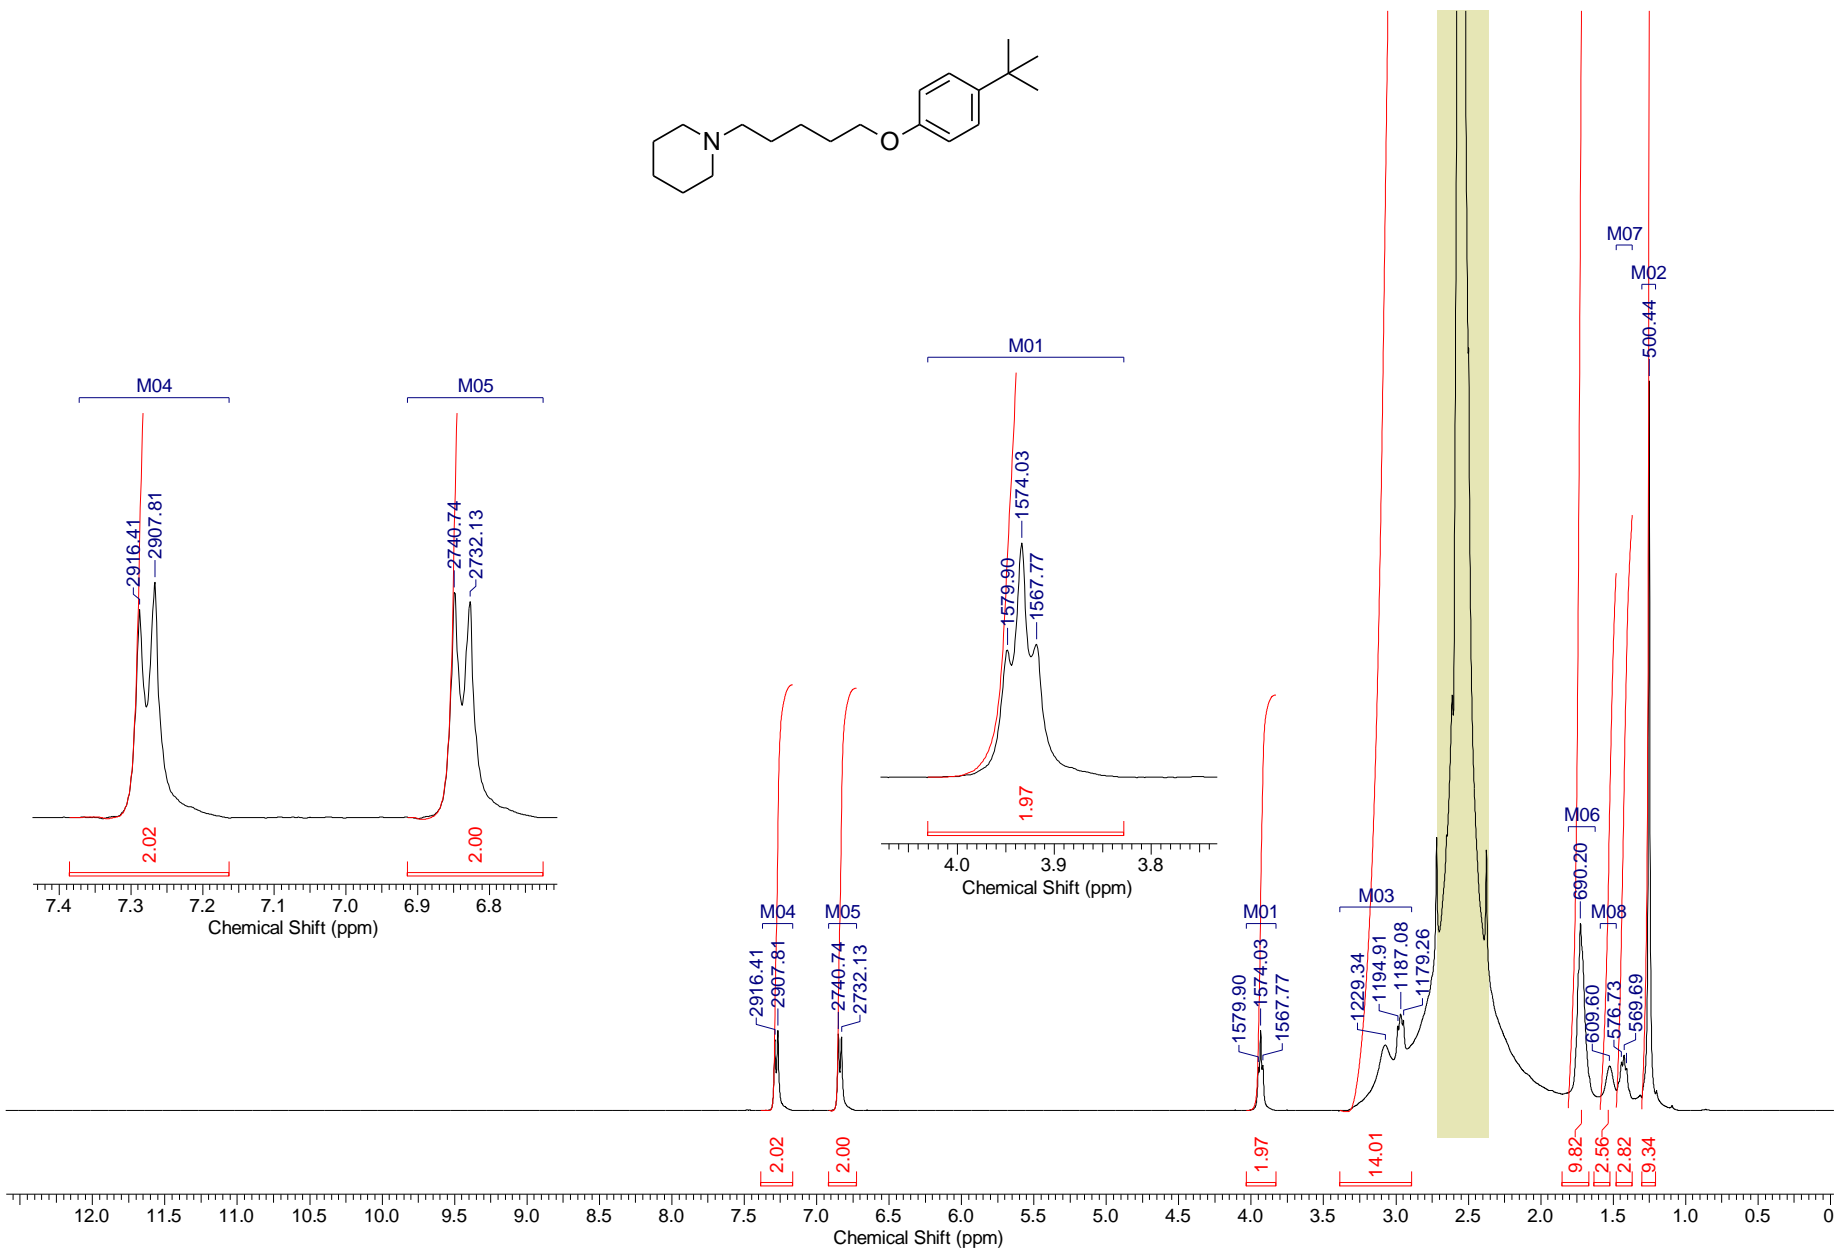

**Fig S5.  $^1\text{H}$  NMR spectrum of 7**

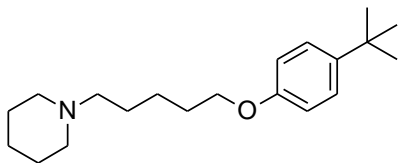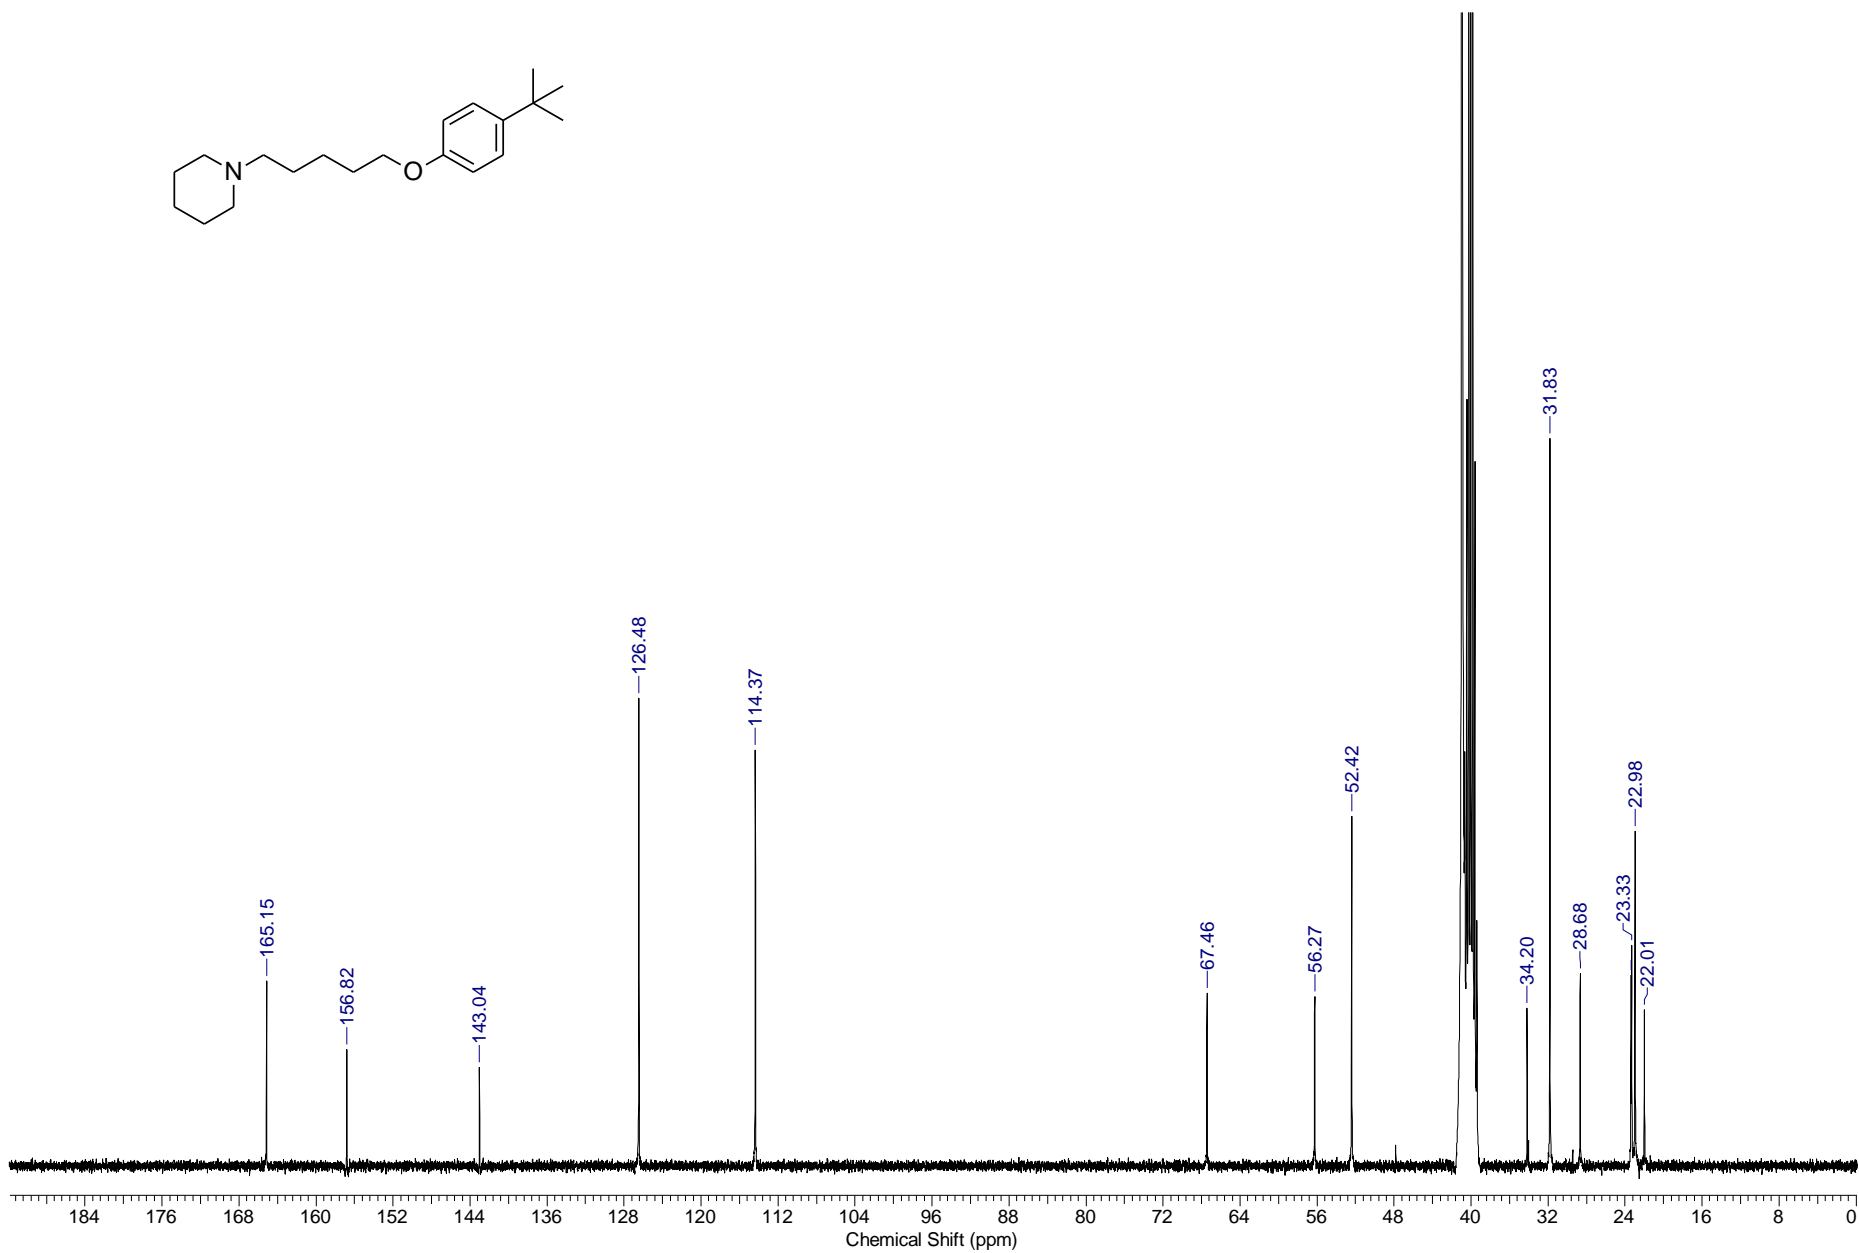

**Fig S6.** <sup>13</sup>C NMR spectrum of **7**

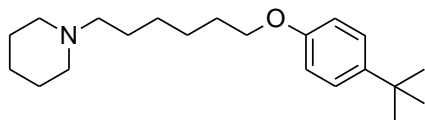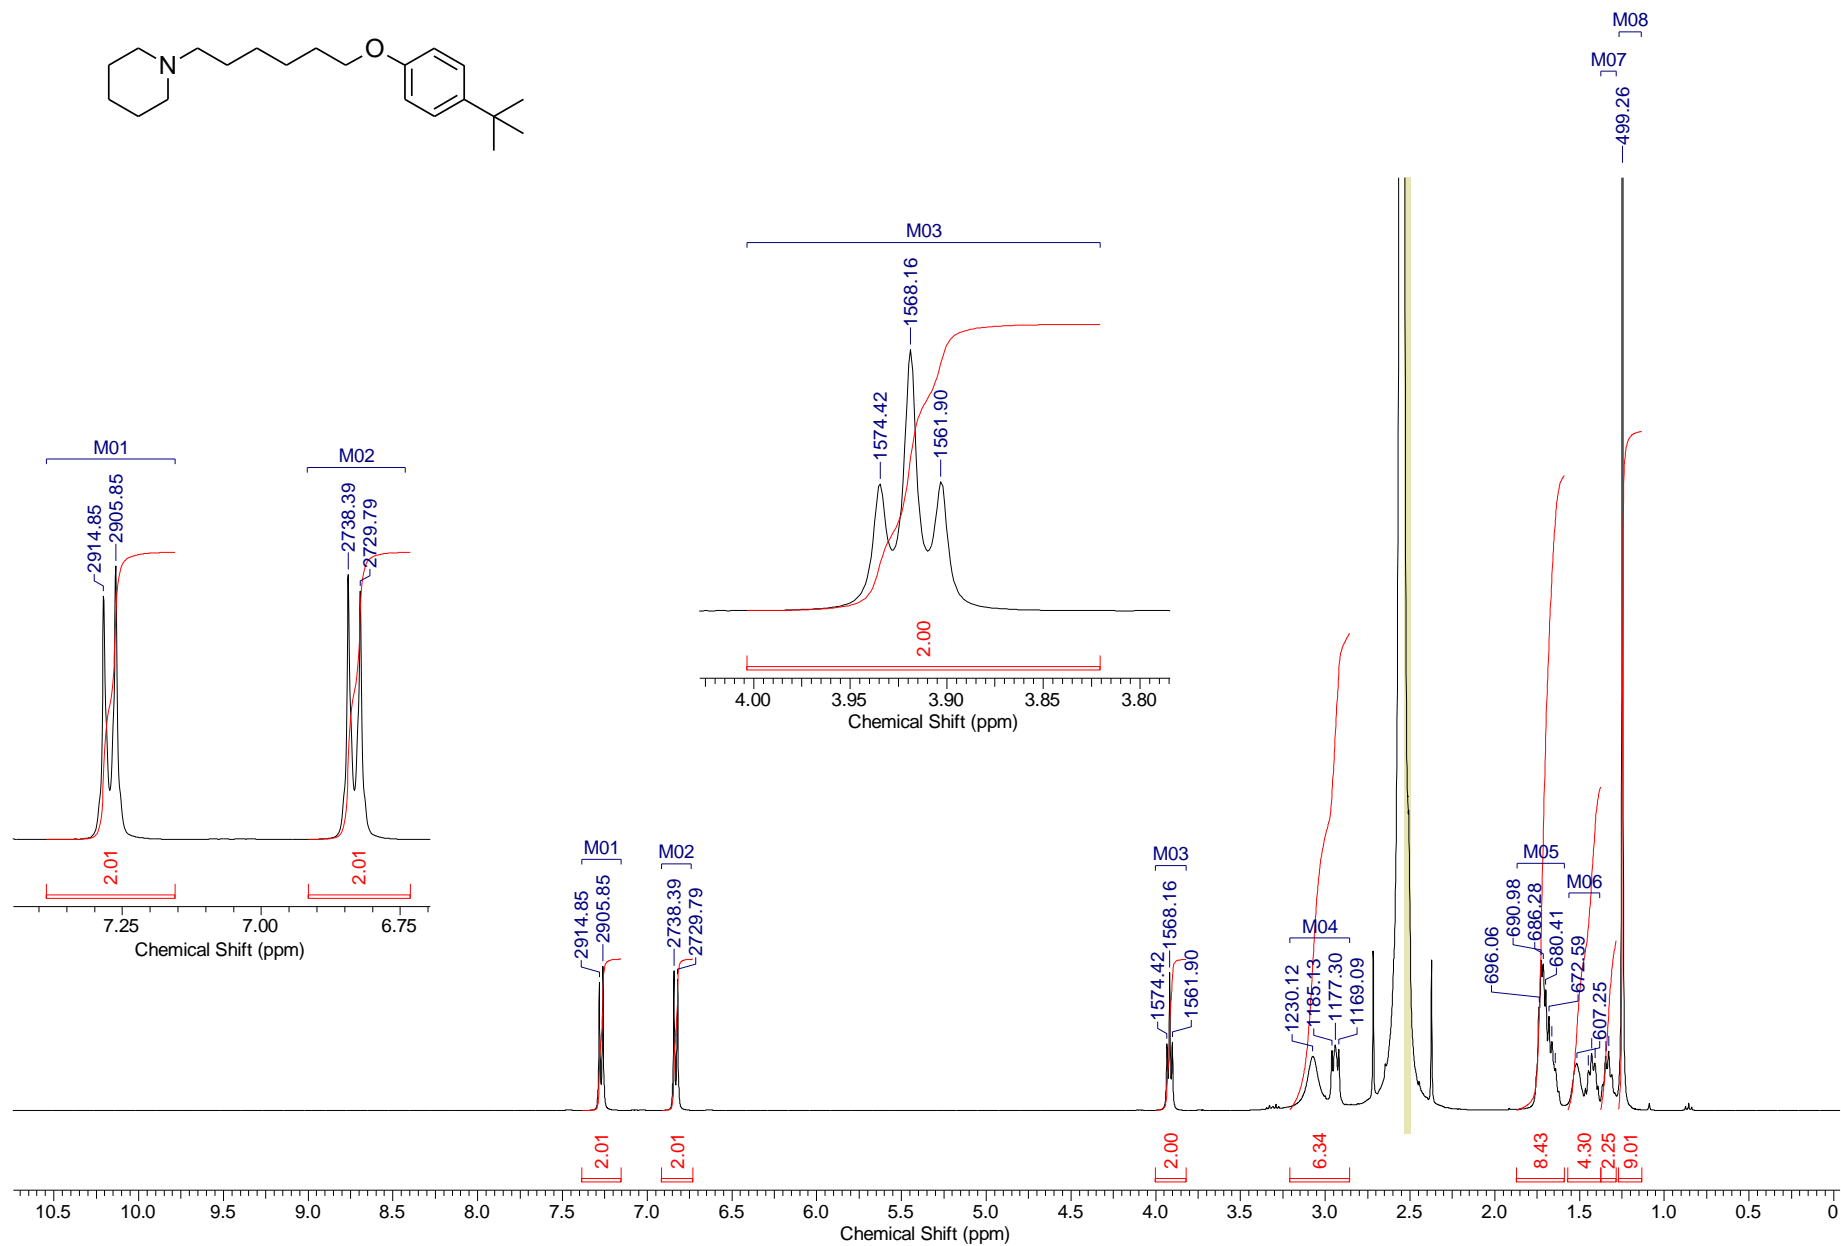

**Fig S7.**  $^1\text{H}$  NMR spectrum of **8**



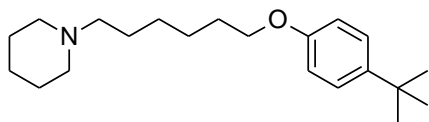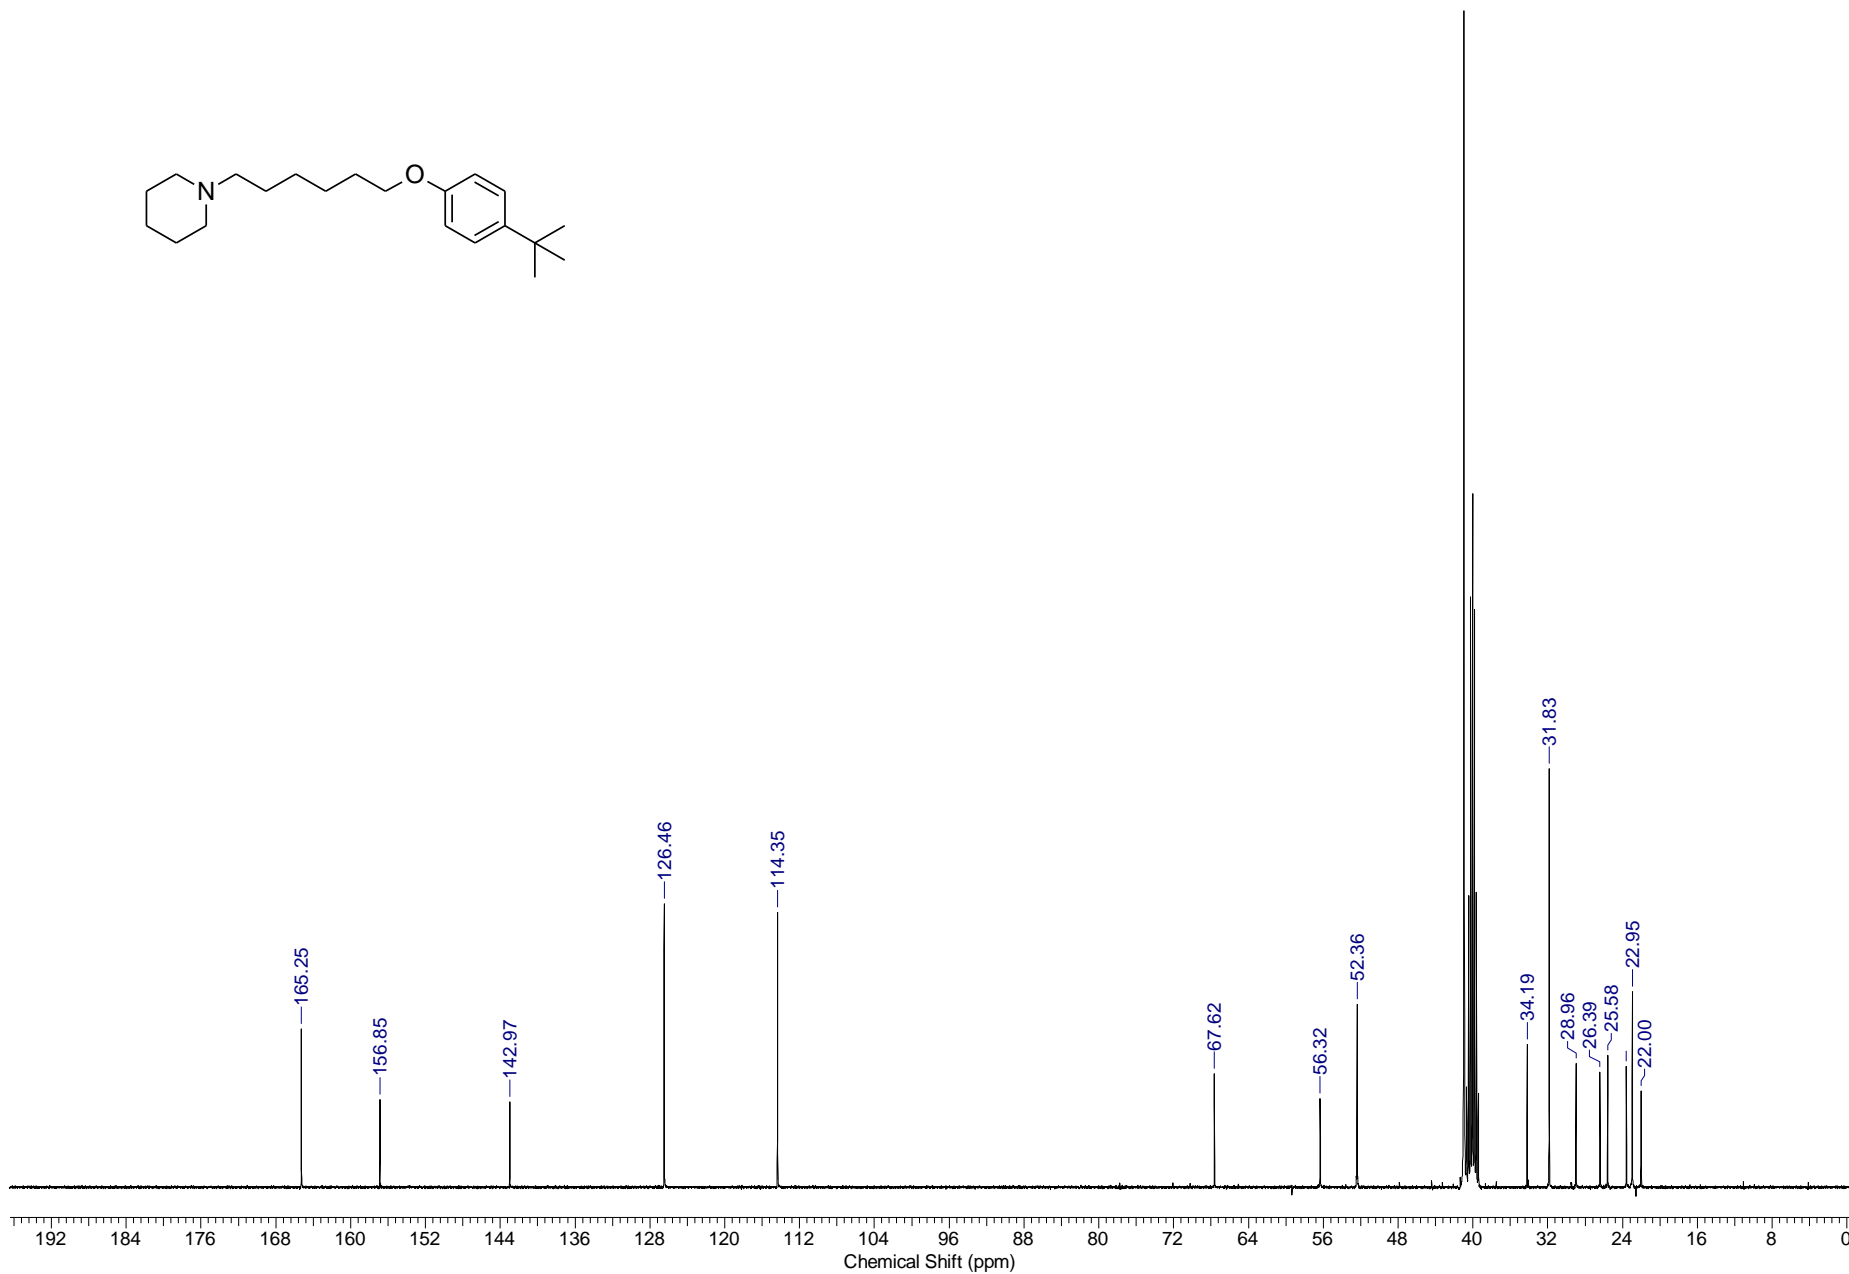

**Fig S8.** <sup>13</sup>C NMR spectrum of **8**

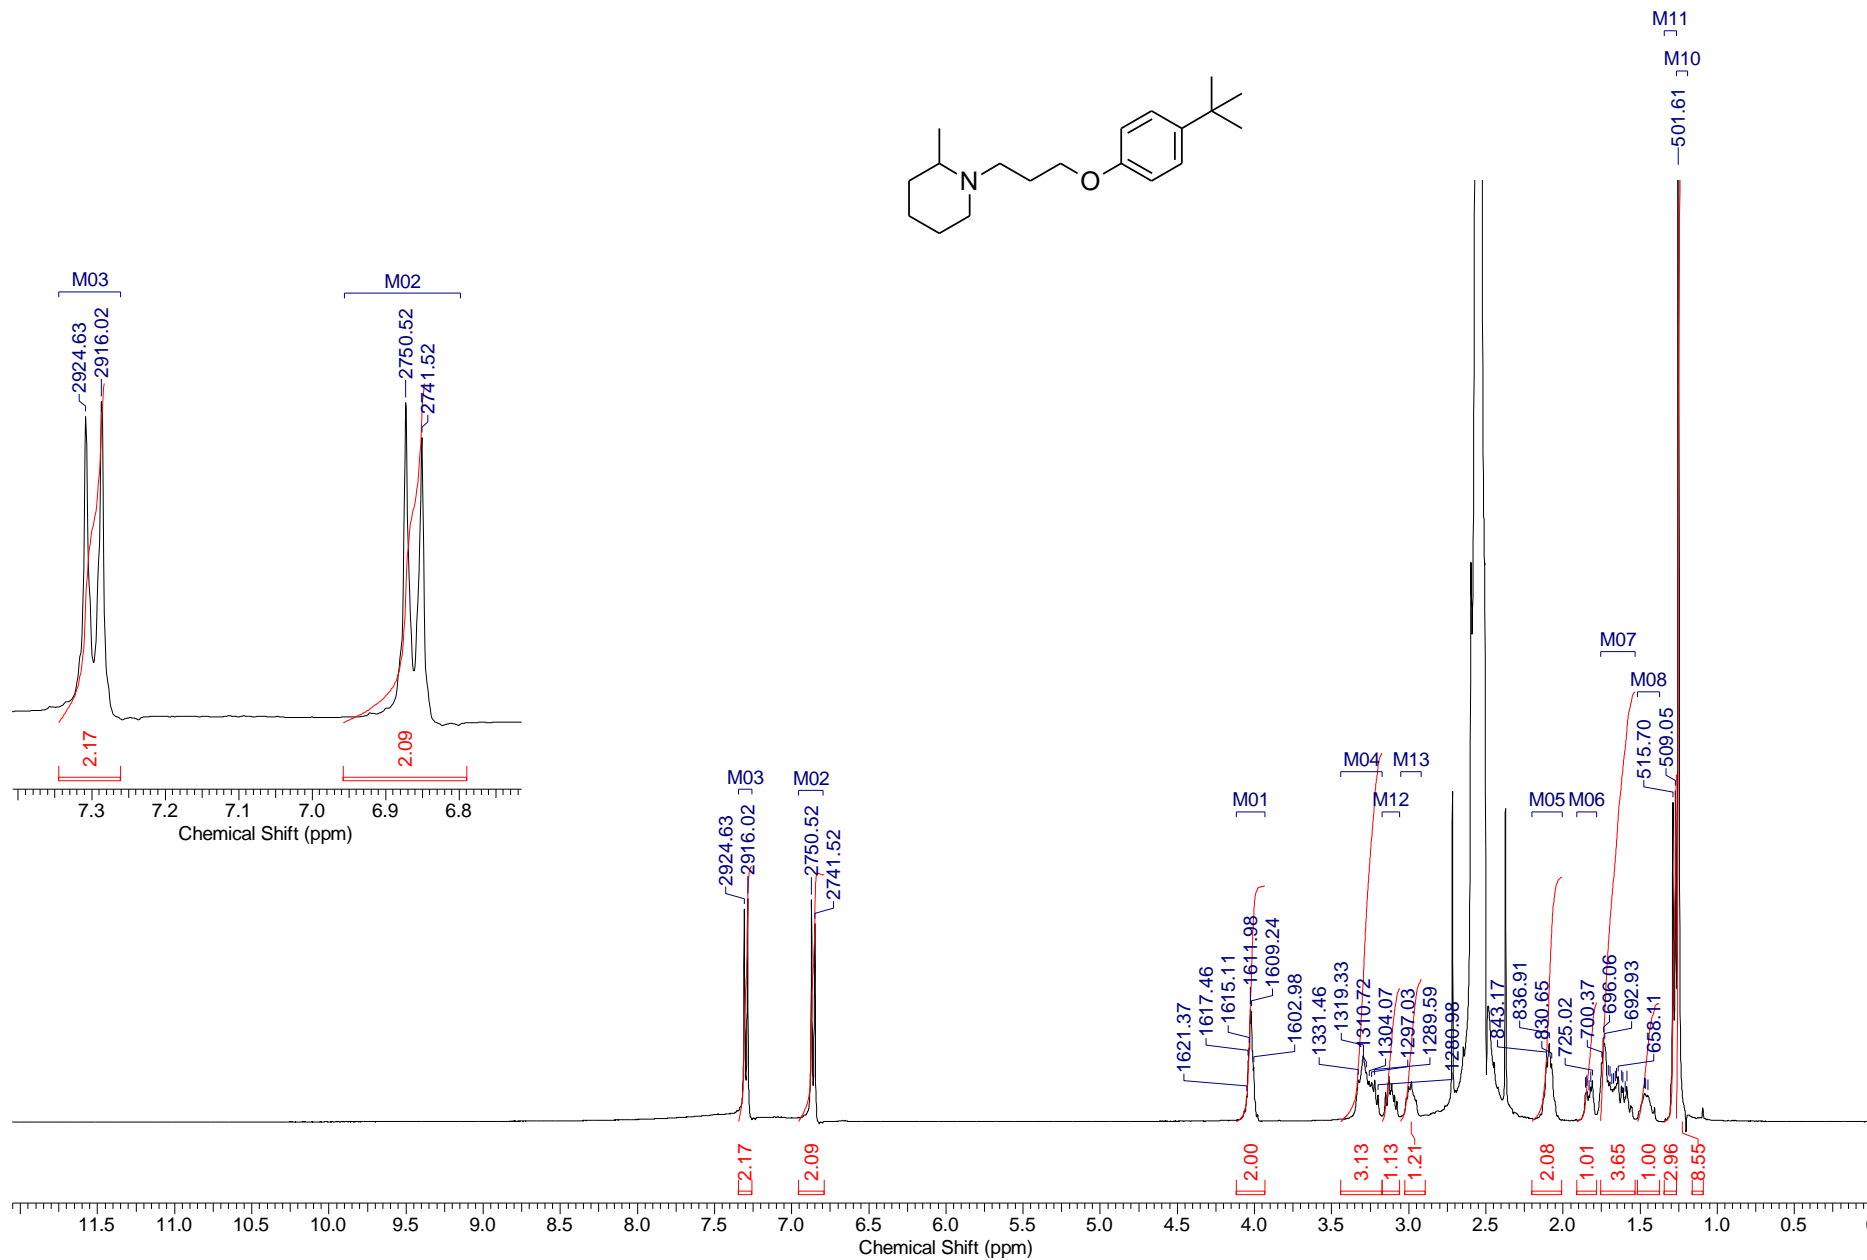

**Fig S9.**  $^1\text{H}$  NMR spectrum of 9

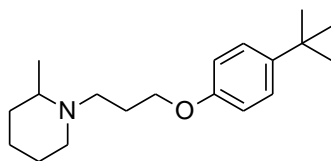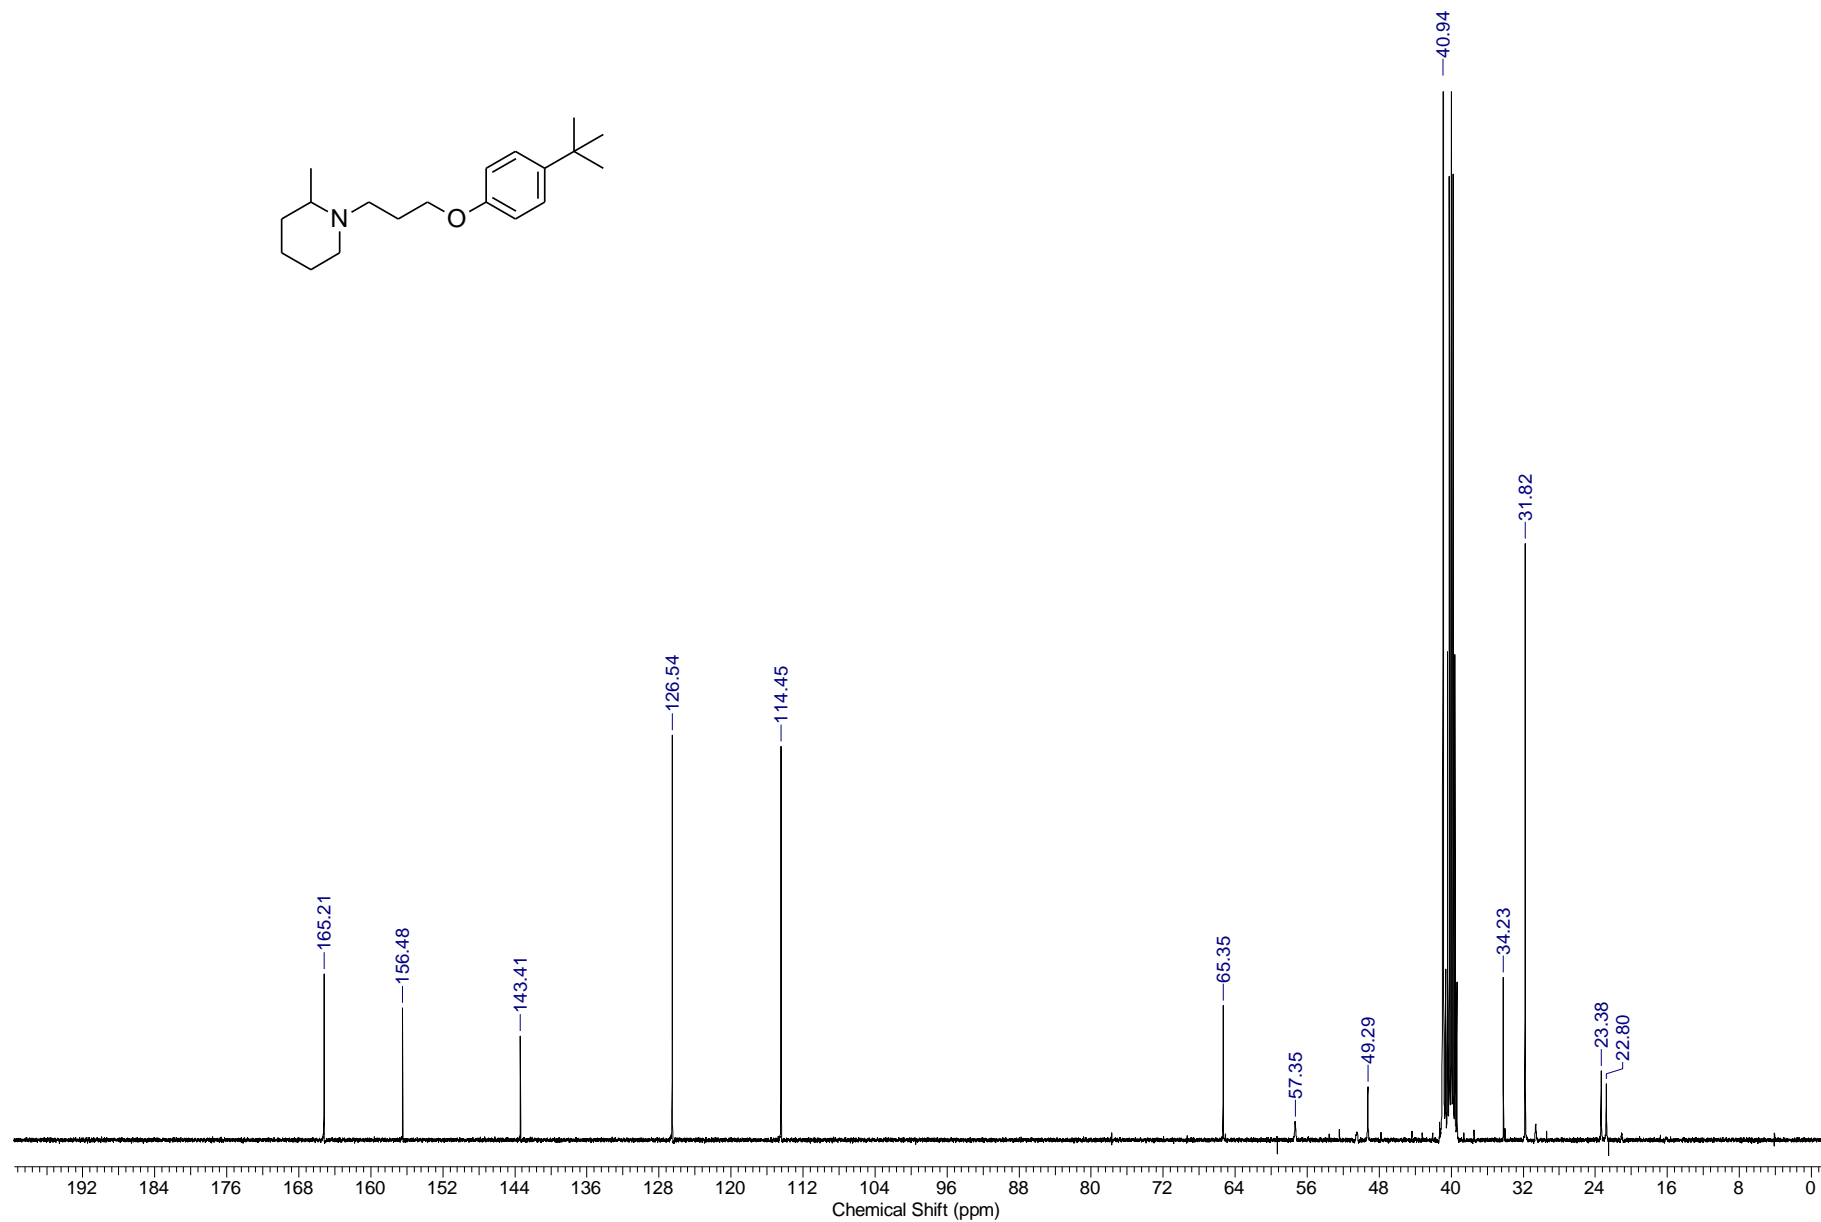

**Fig S10.** <sup>13</sup>C NMR spectrum of **9**

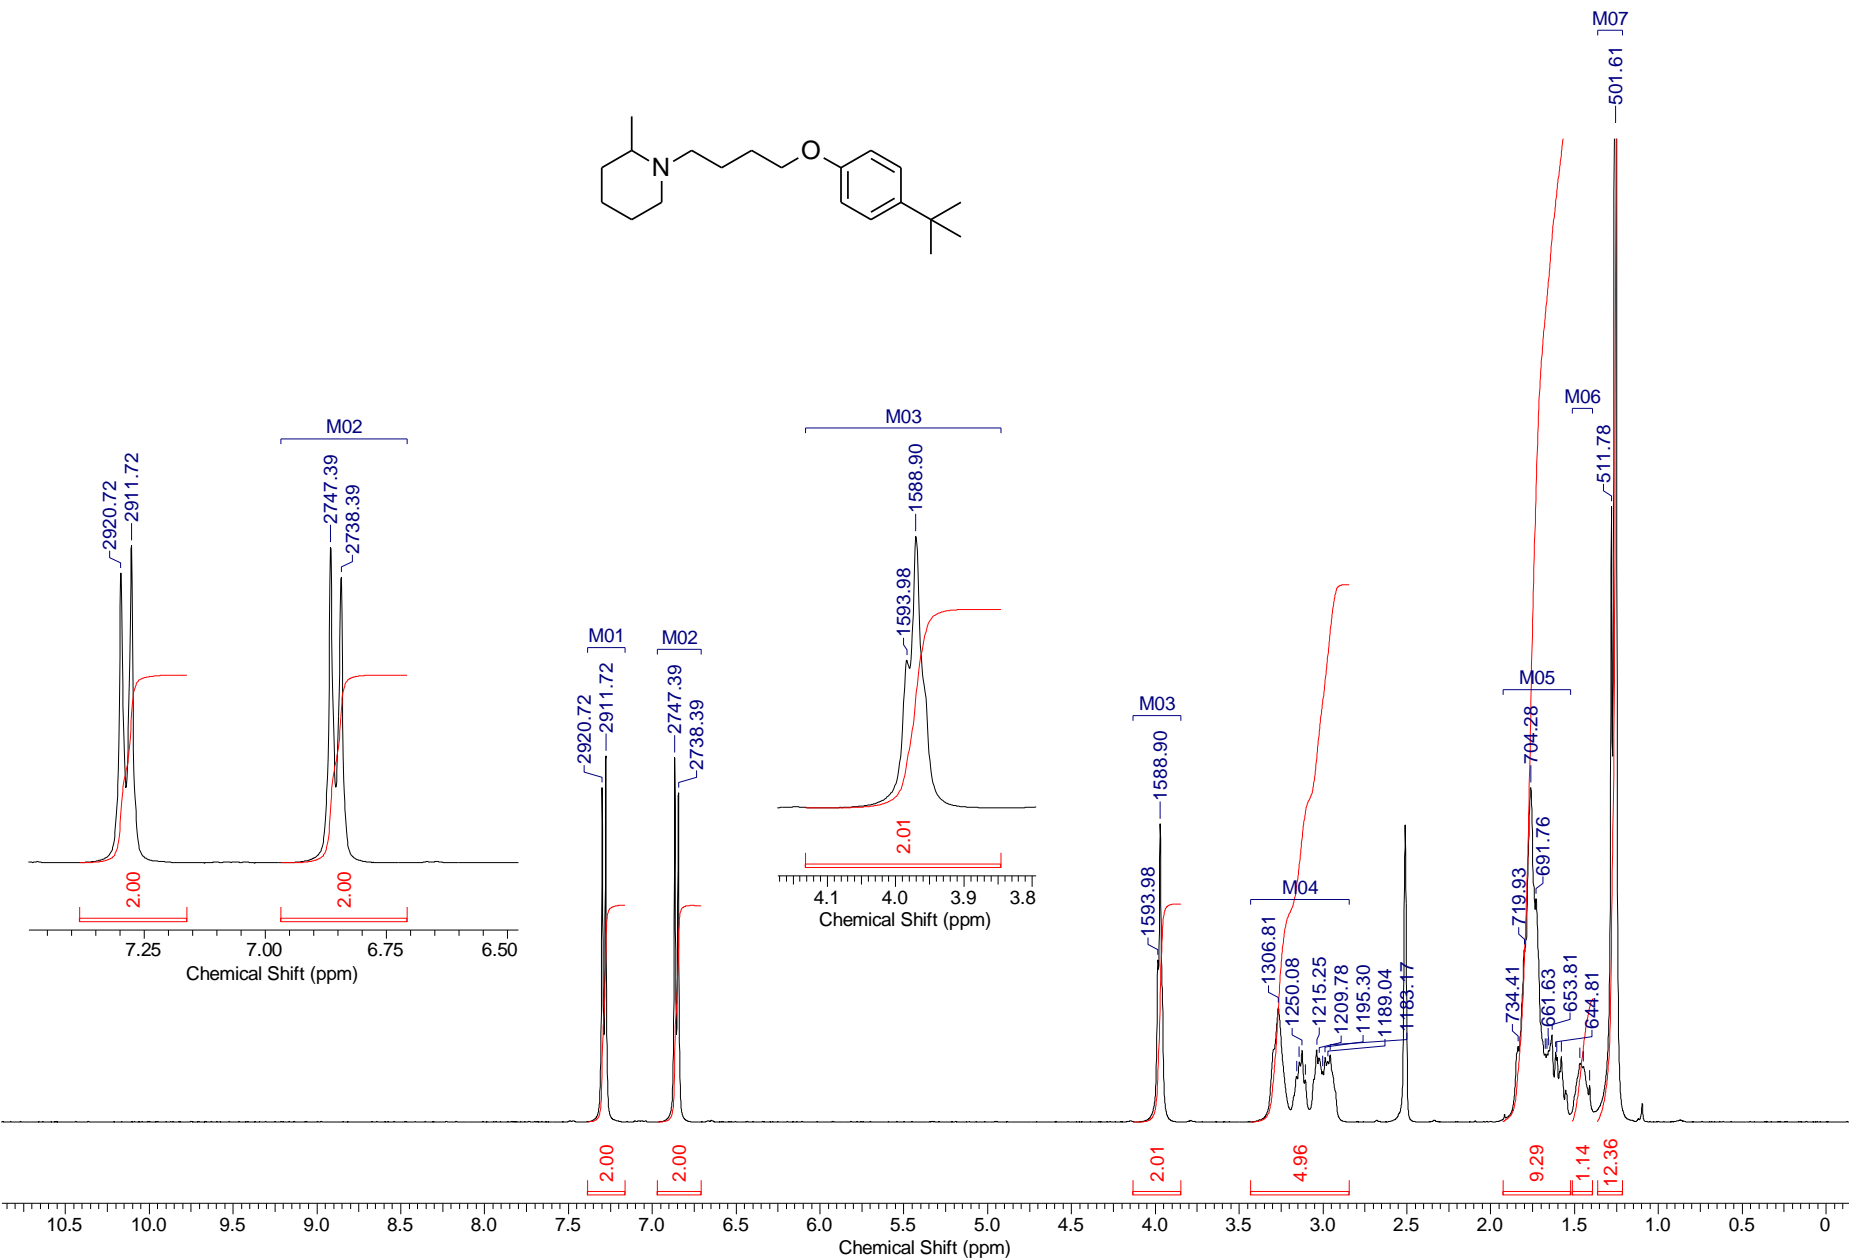

**Fig S11.**  $^1\text{H}$  NMR spectrum of **10**

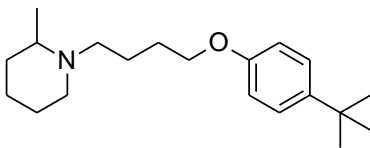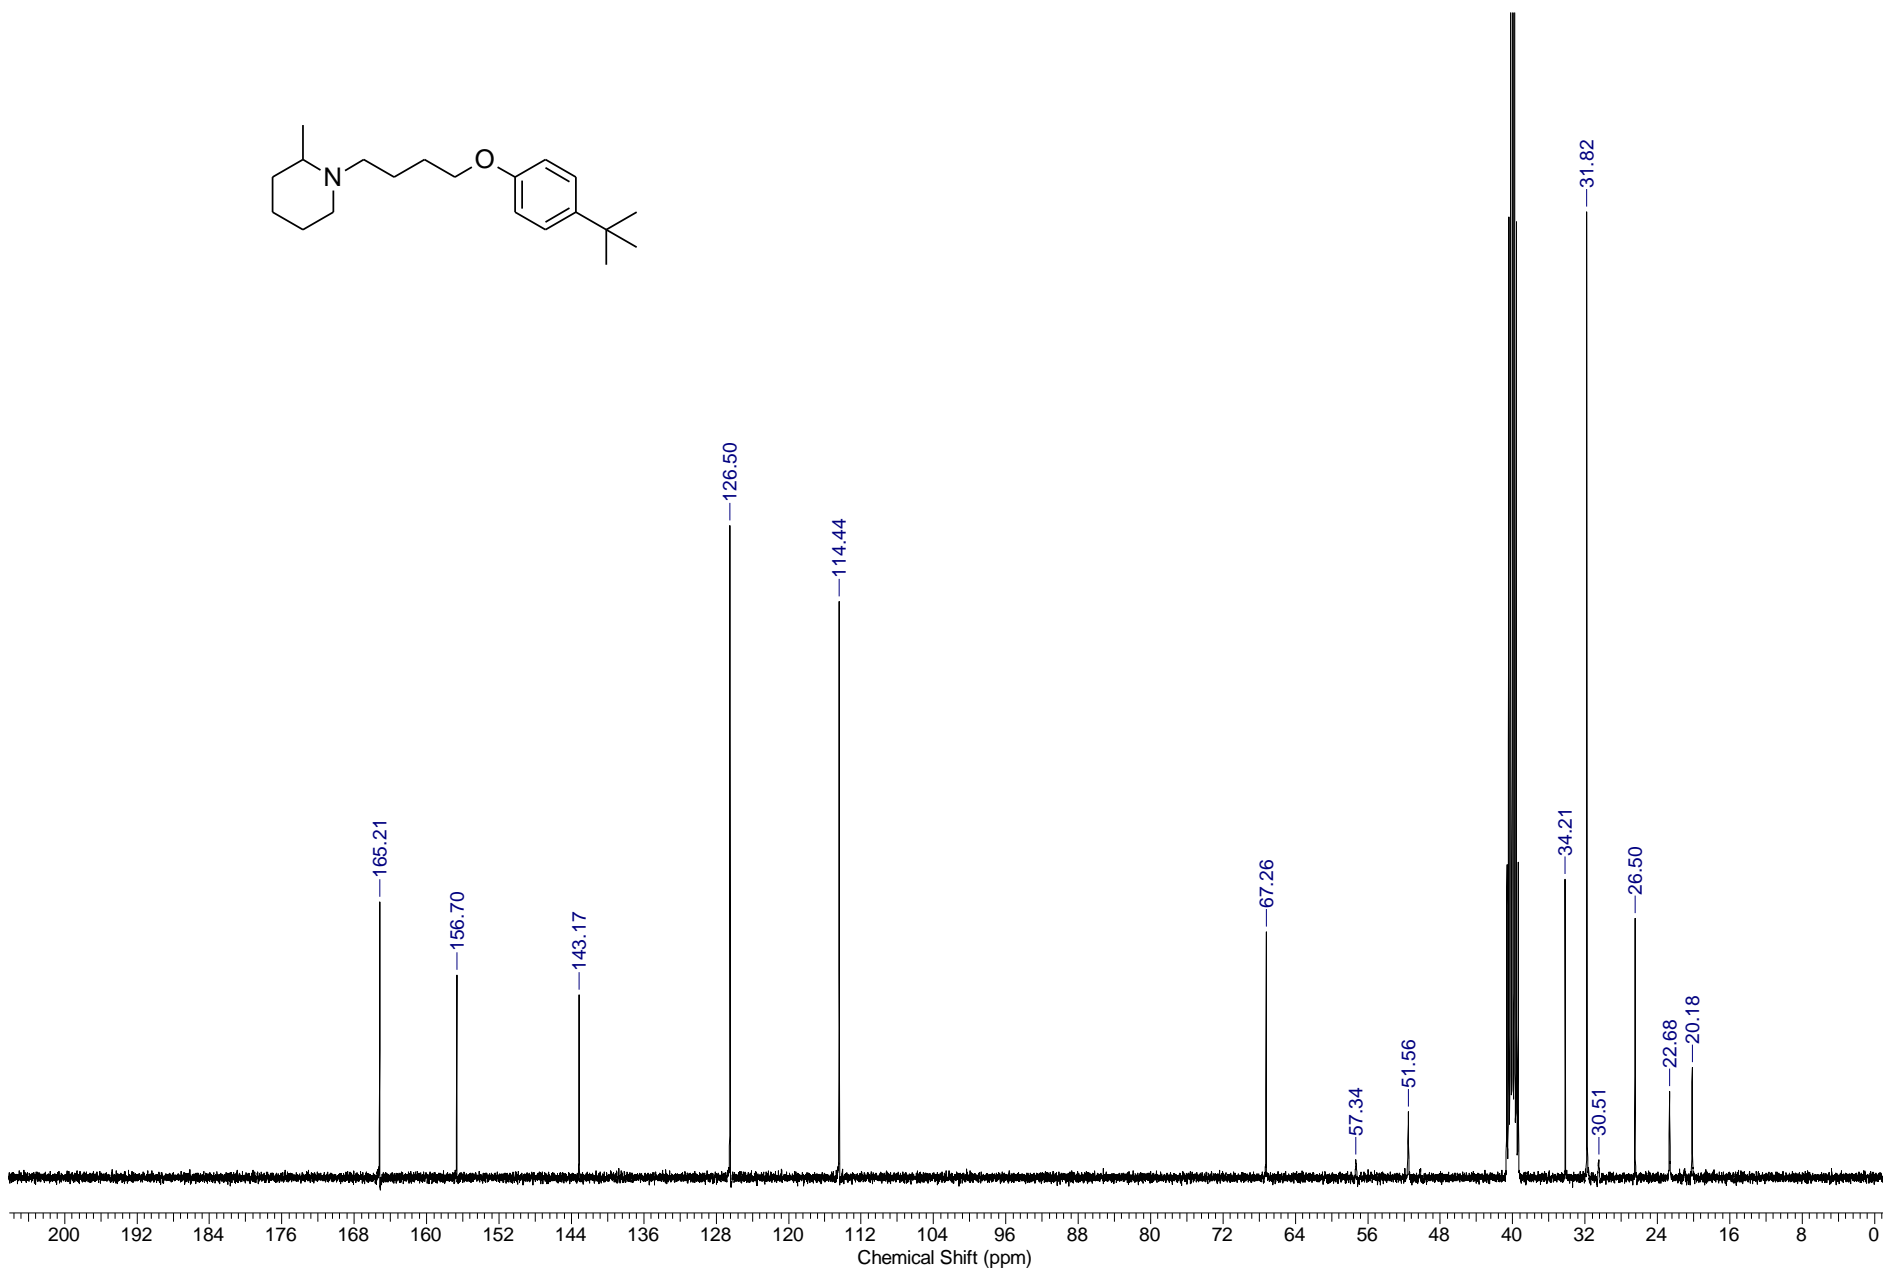

**Fig S12.** <sup>13</sup>C NMR spectrum of **10**

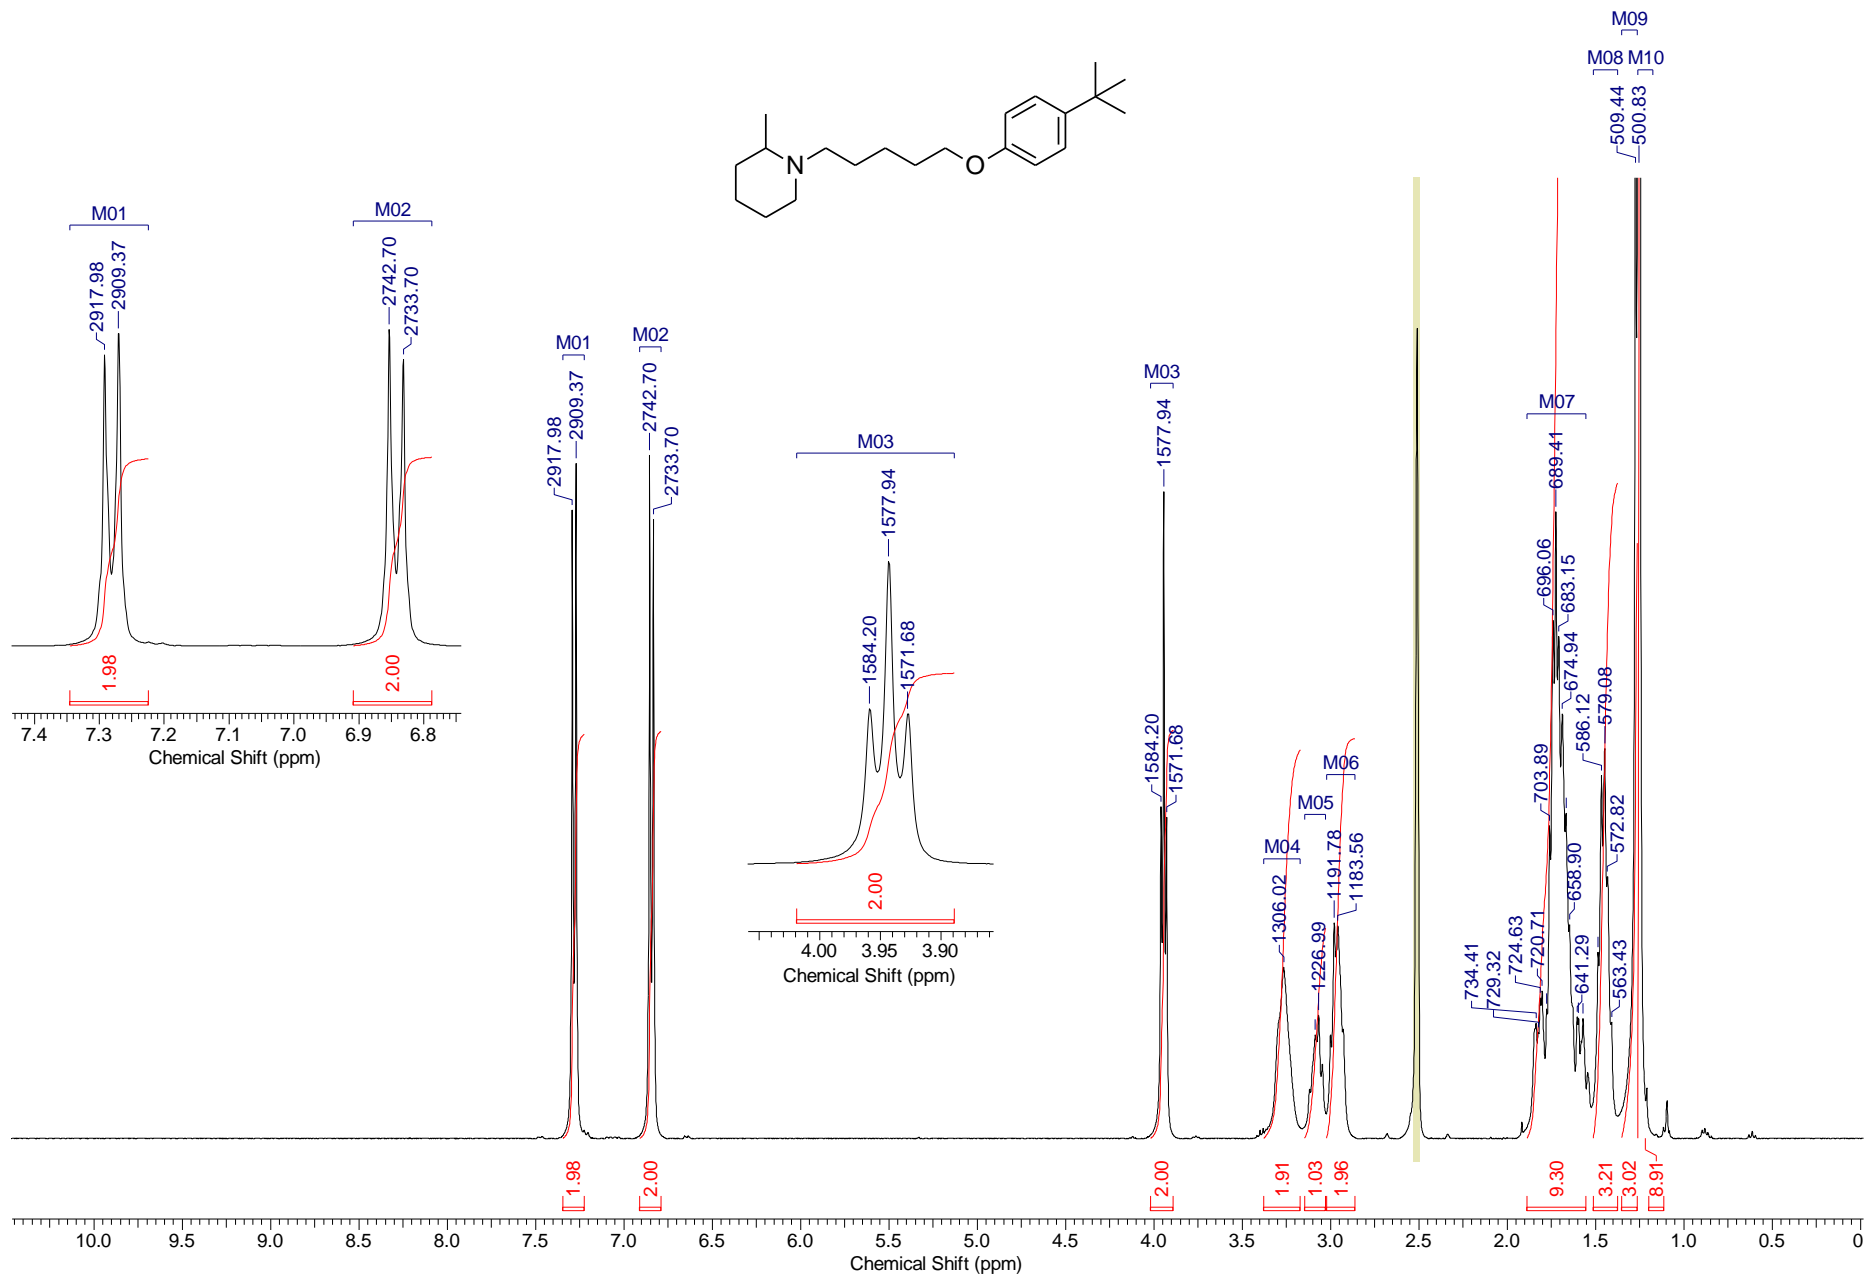

**Fig S13.** <sup>1</sup>H NMR spectrum of **11**

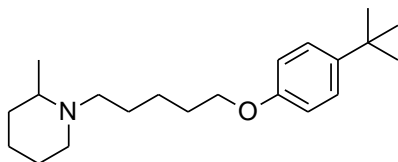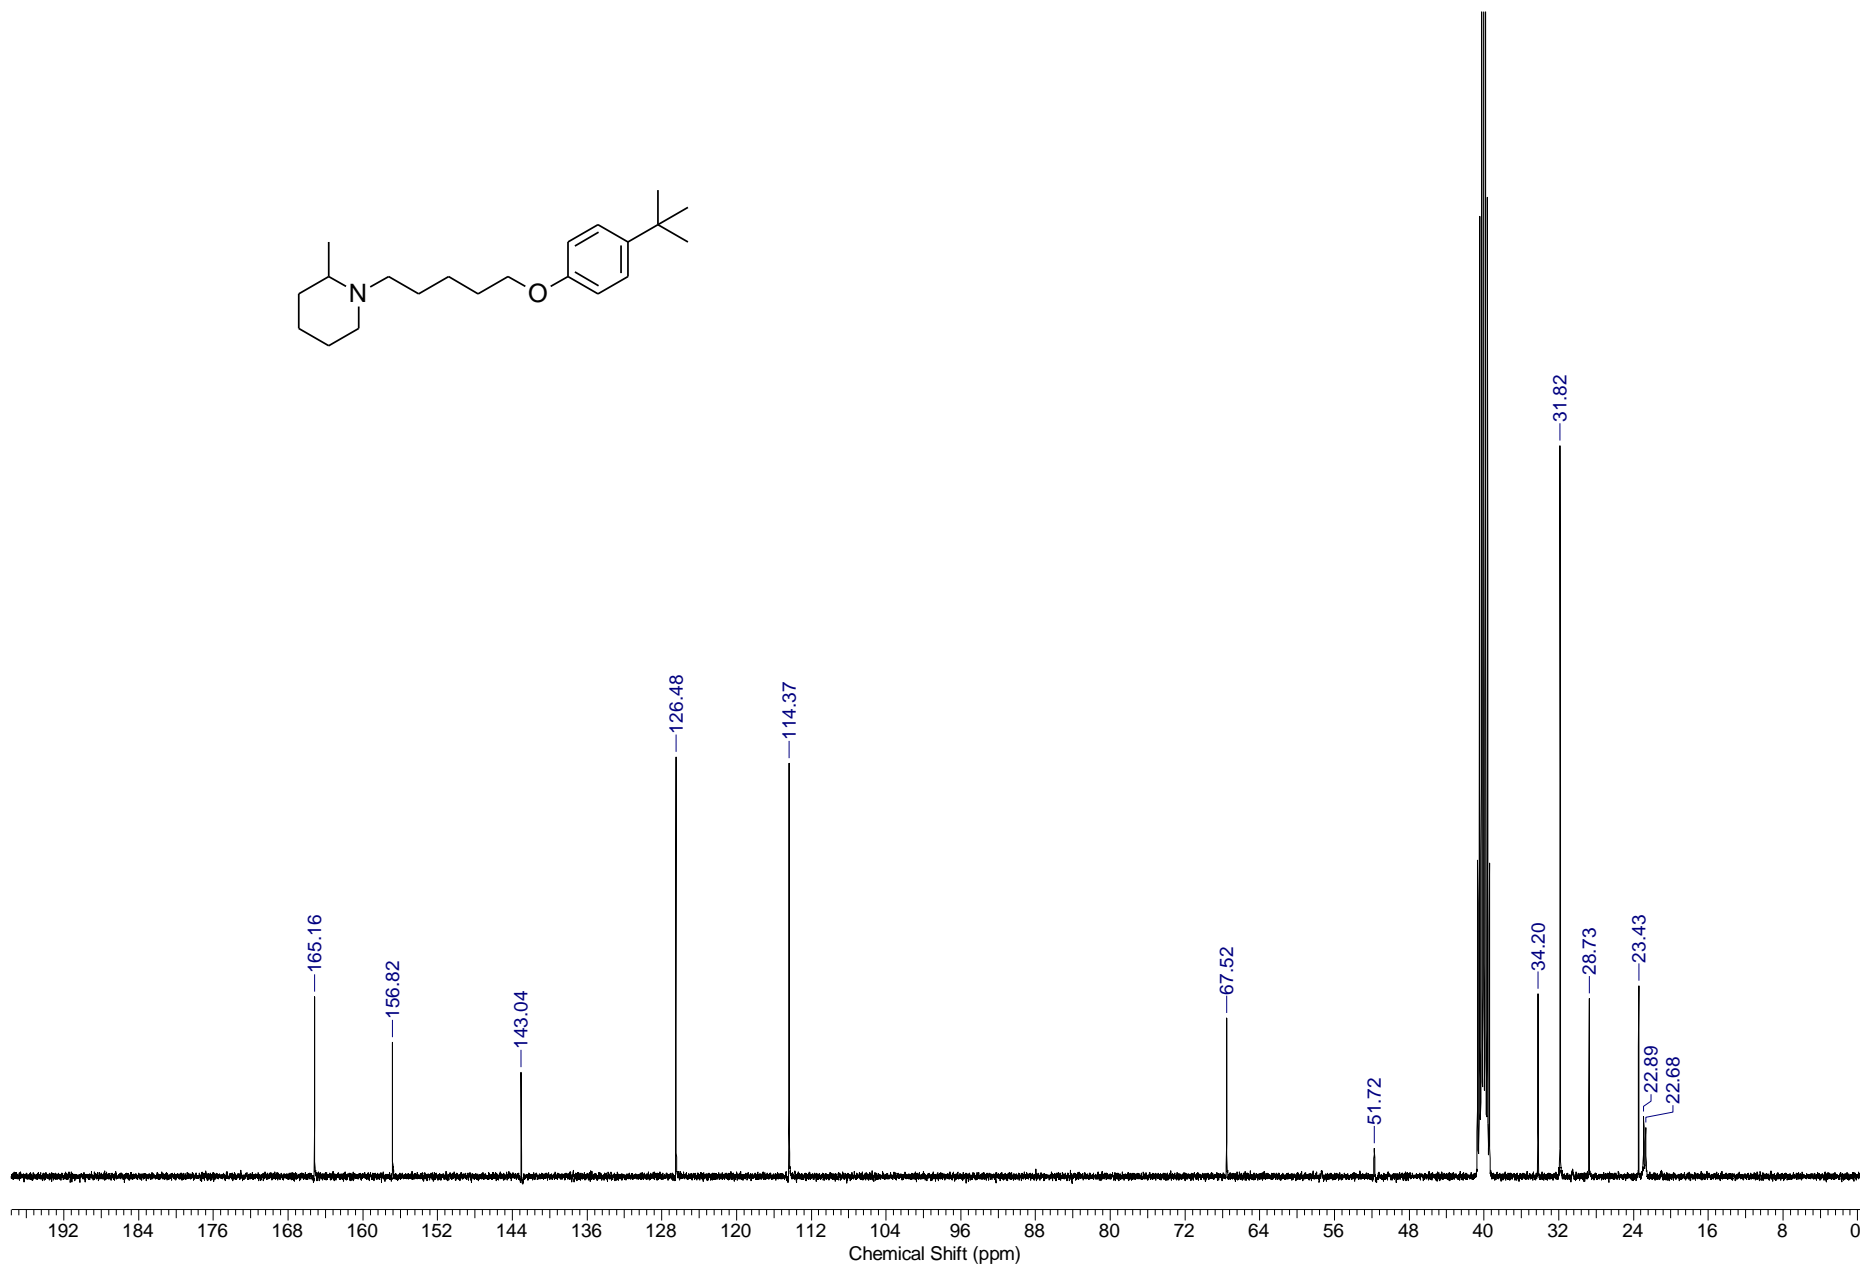

**Fig S14.** <sup>13</sup>C NMR spectrum of **11**

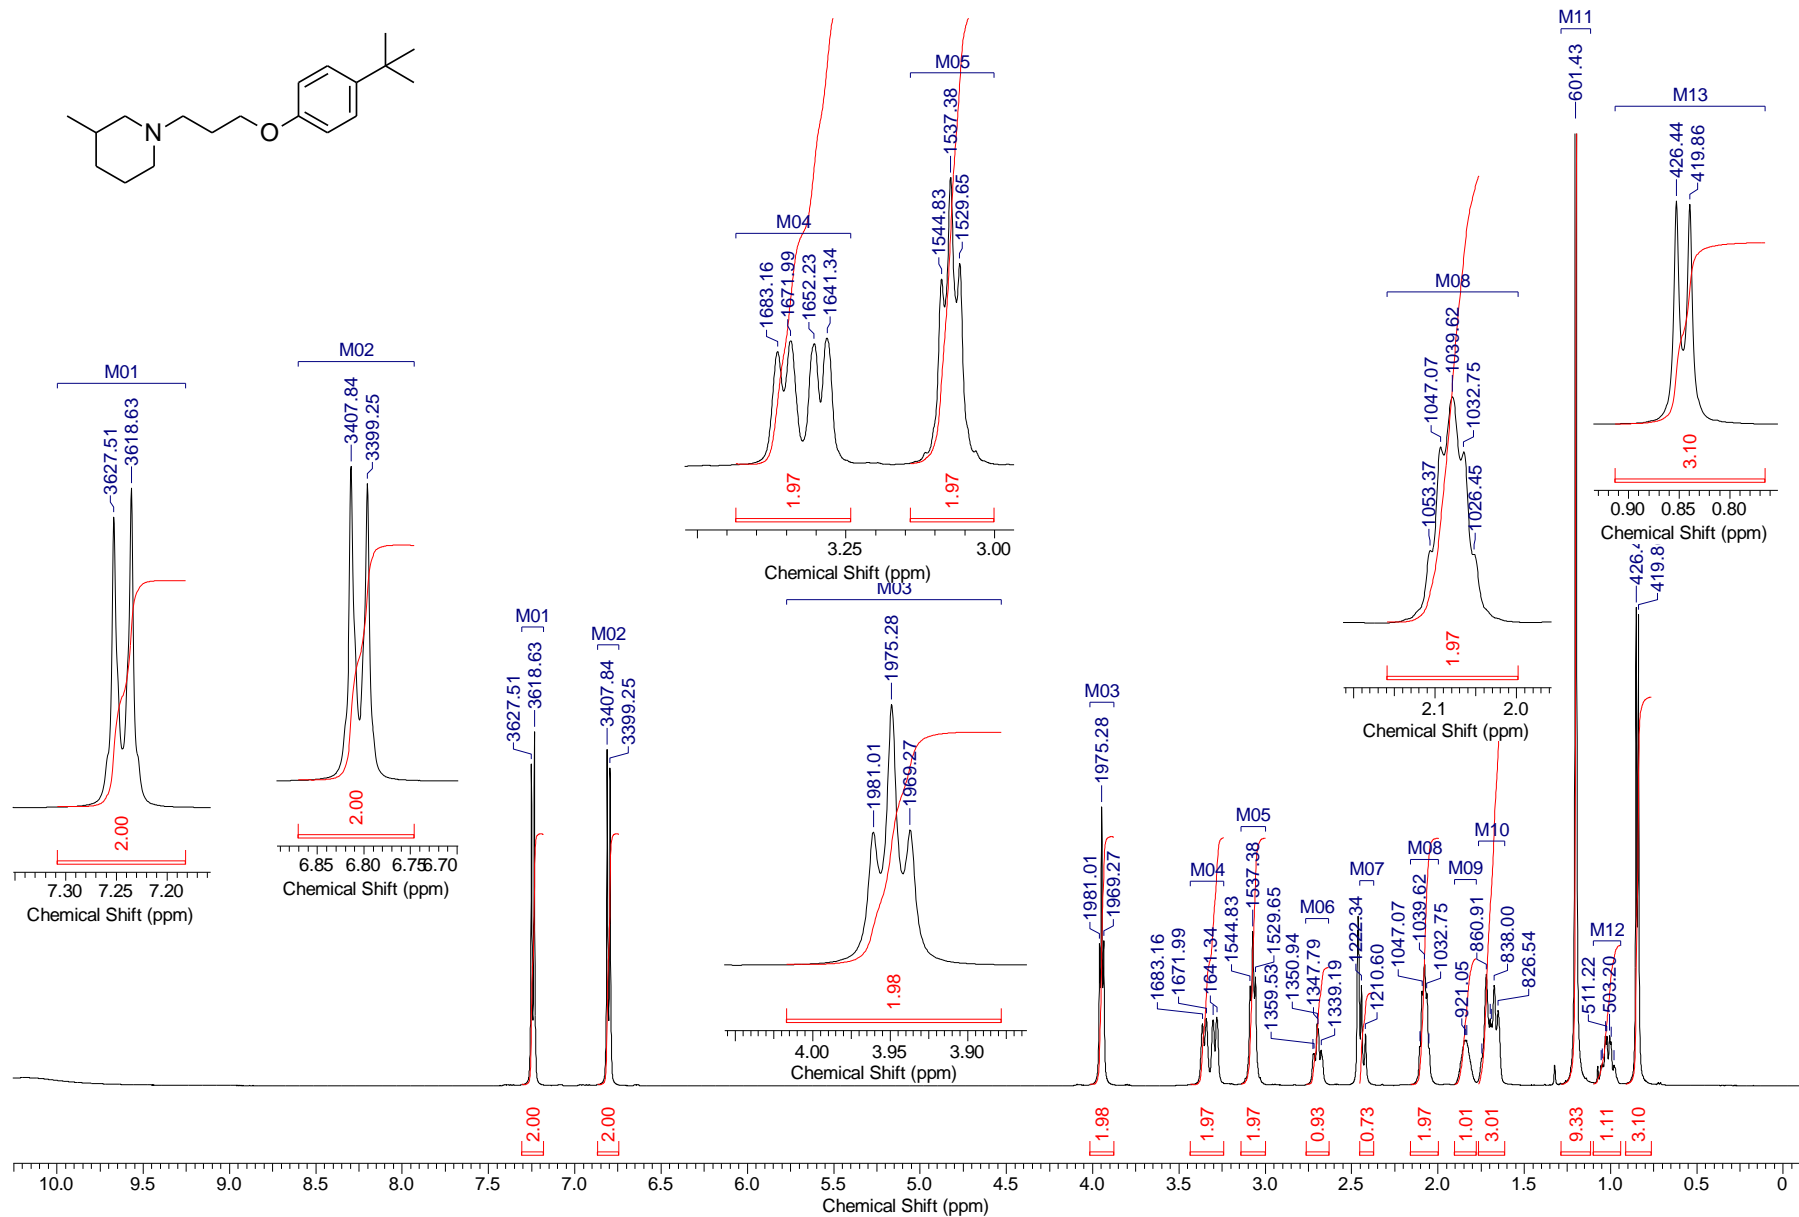

**Fig S15.**  $^1\text{H}$  NMR spectrum of **12**



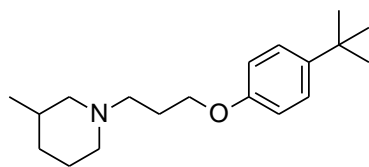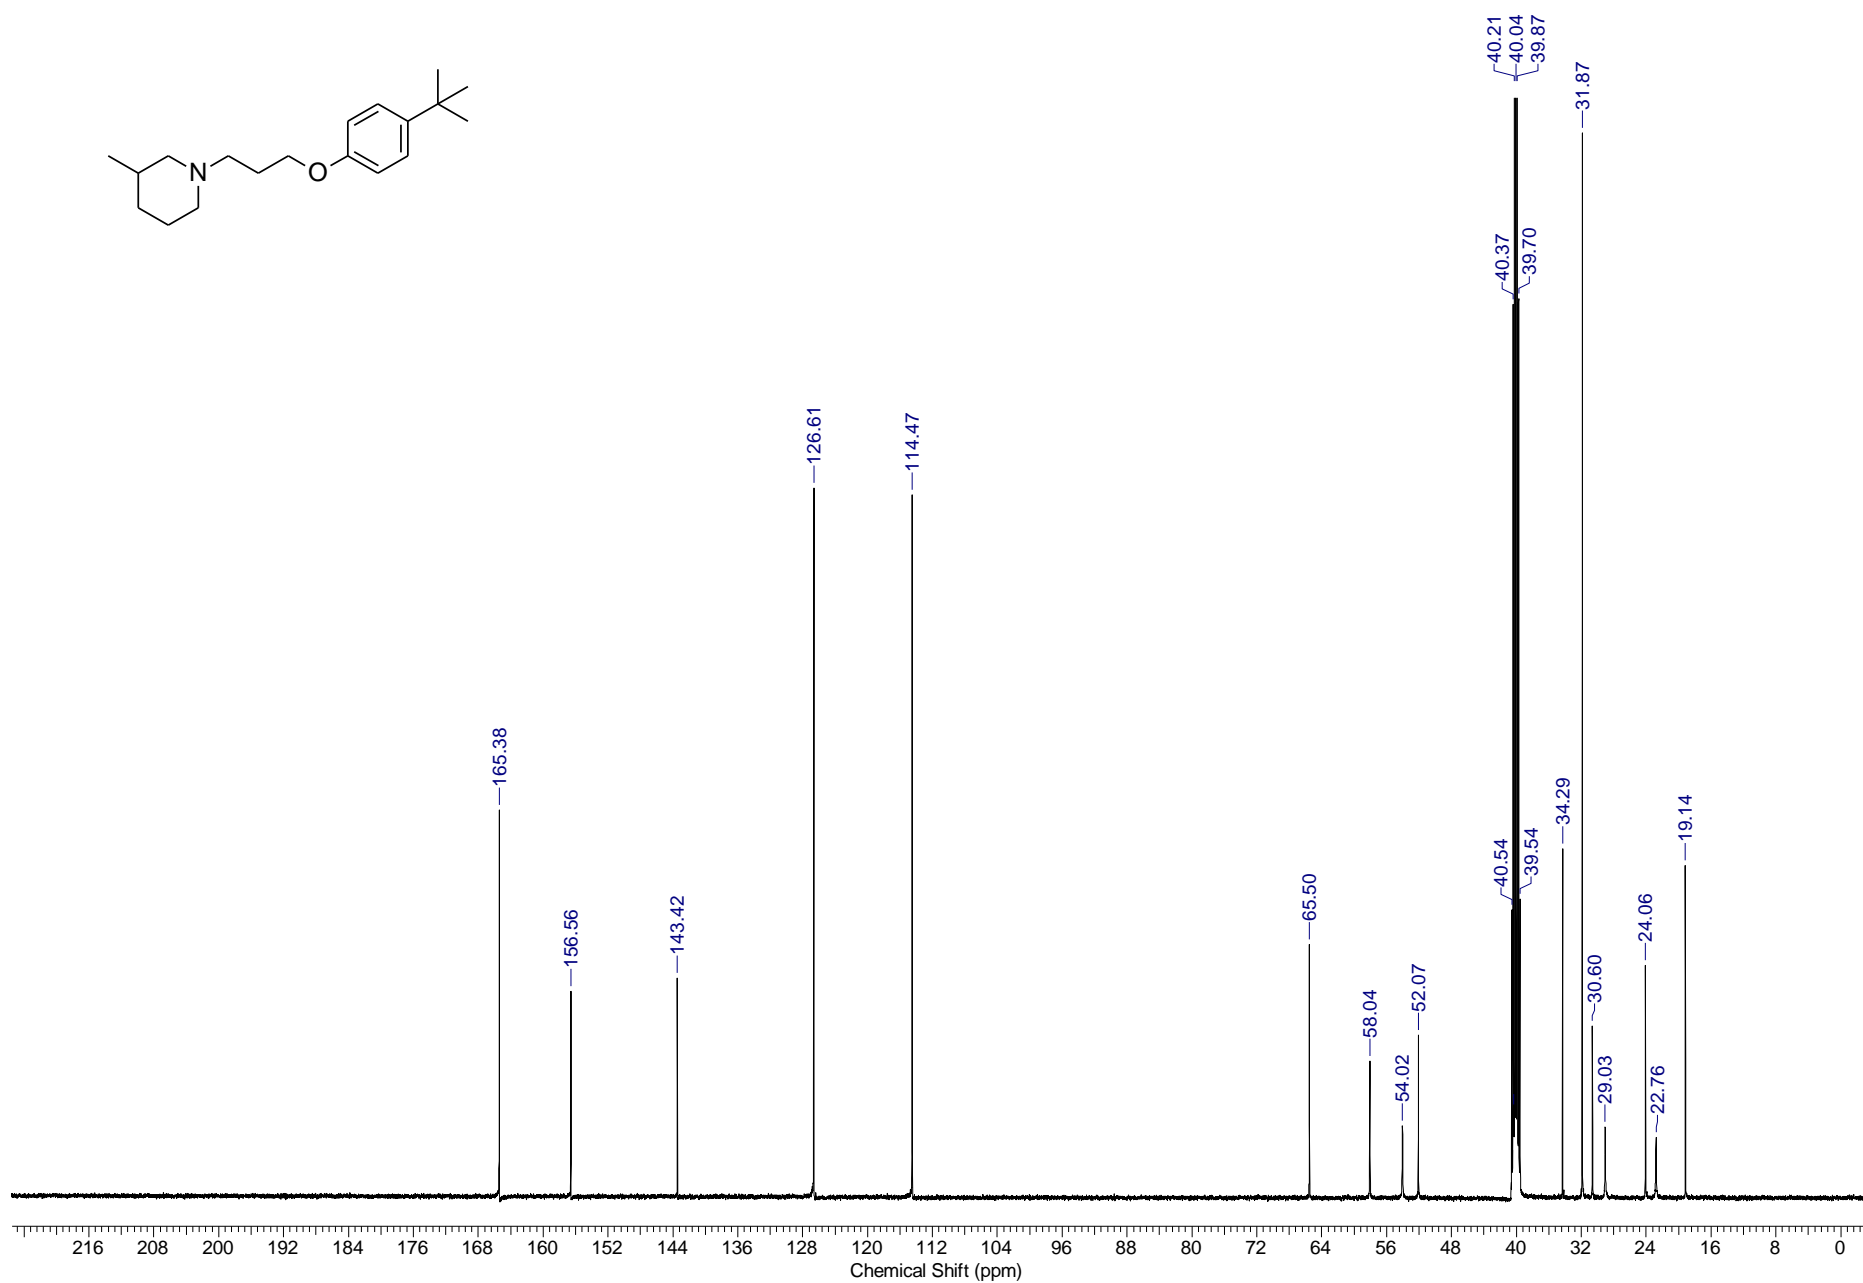

**Fig S16.** <sup>13</sup>C NMR spectrum of **12**

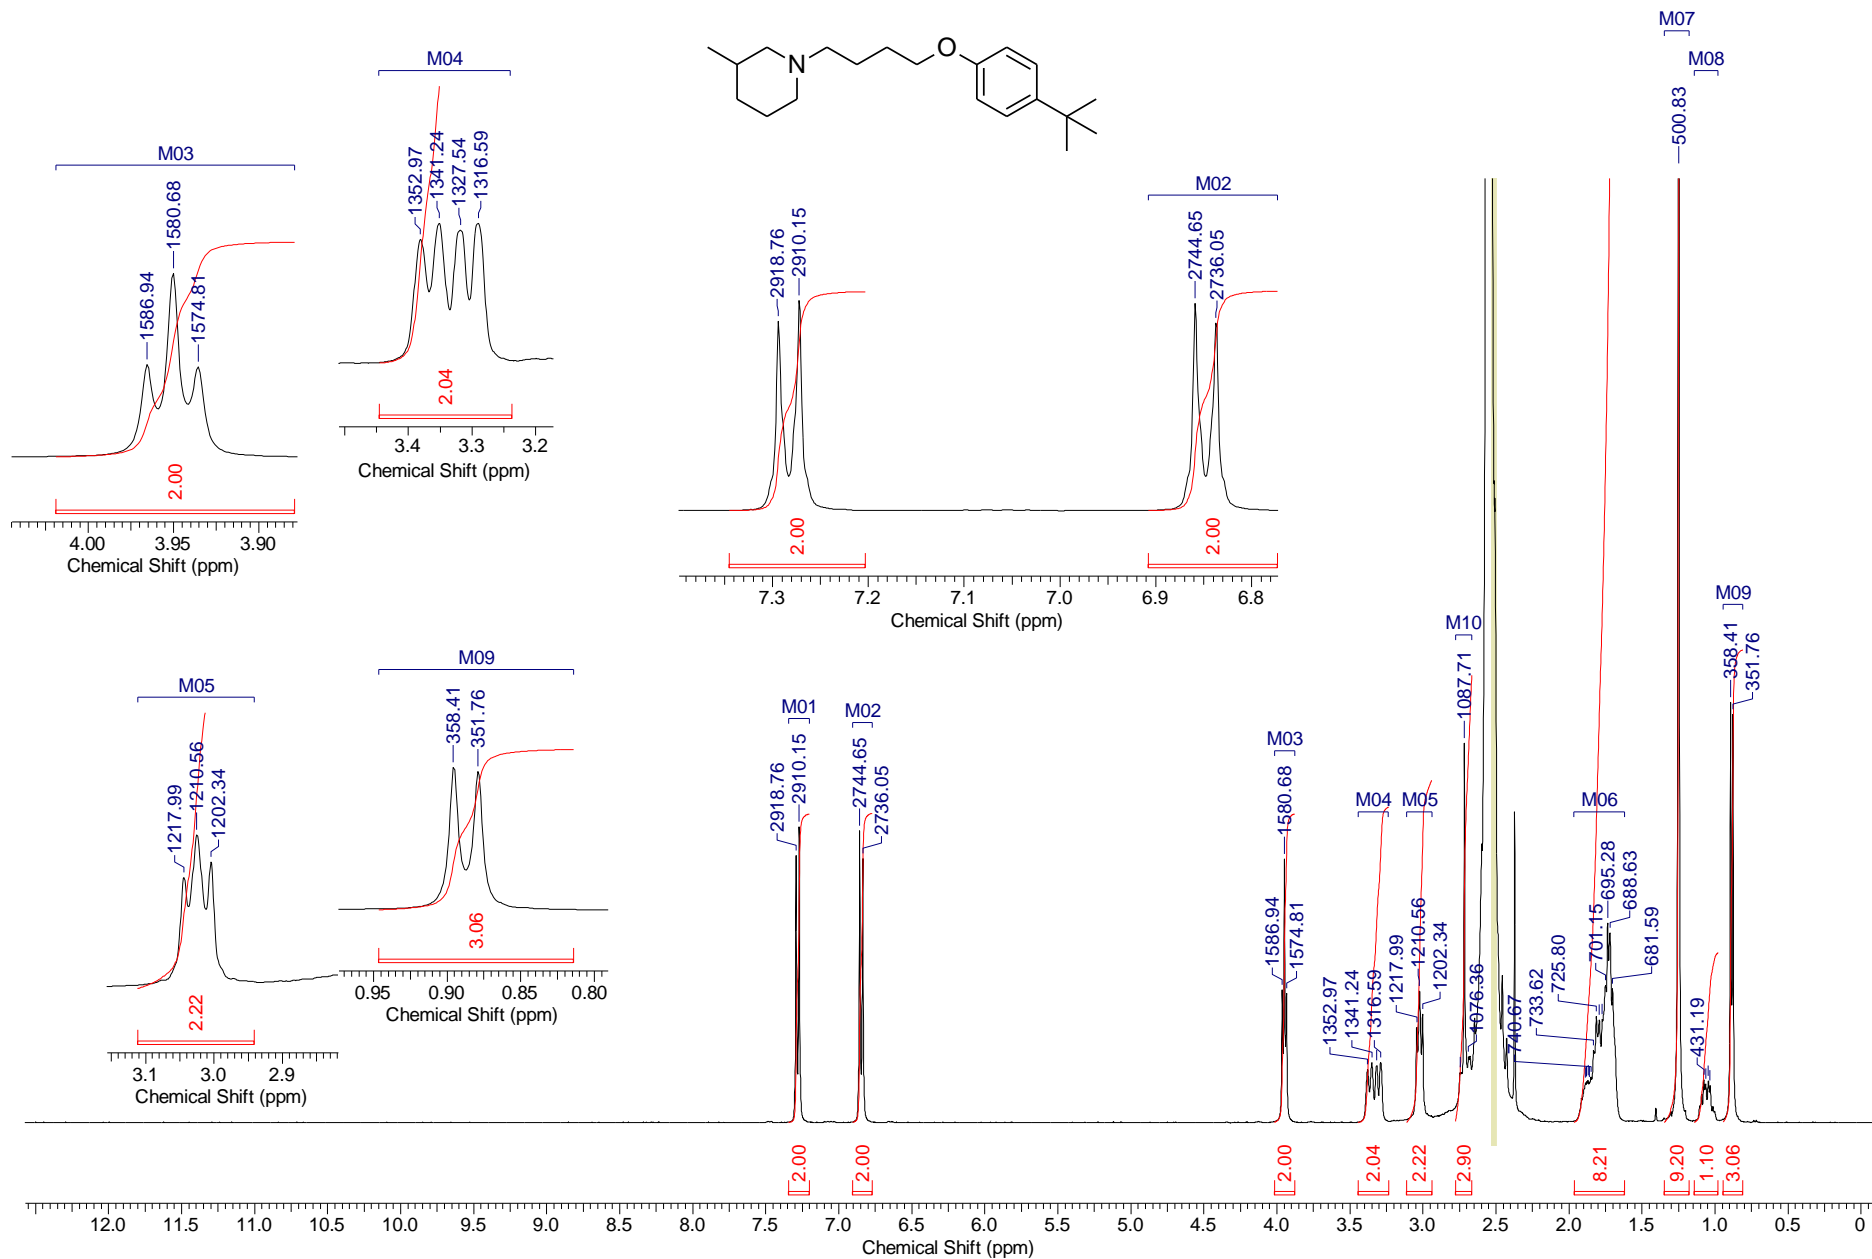

**Fig S17.**  $^1\text{H}$  NMR spectrum of **13**

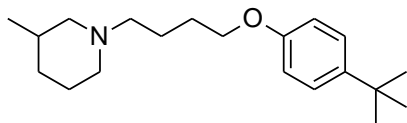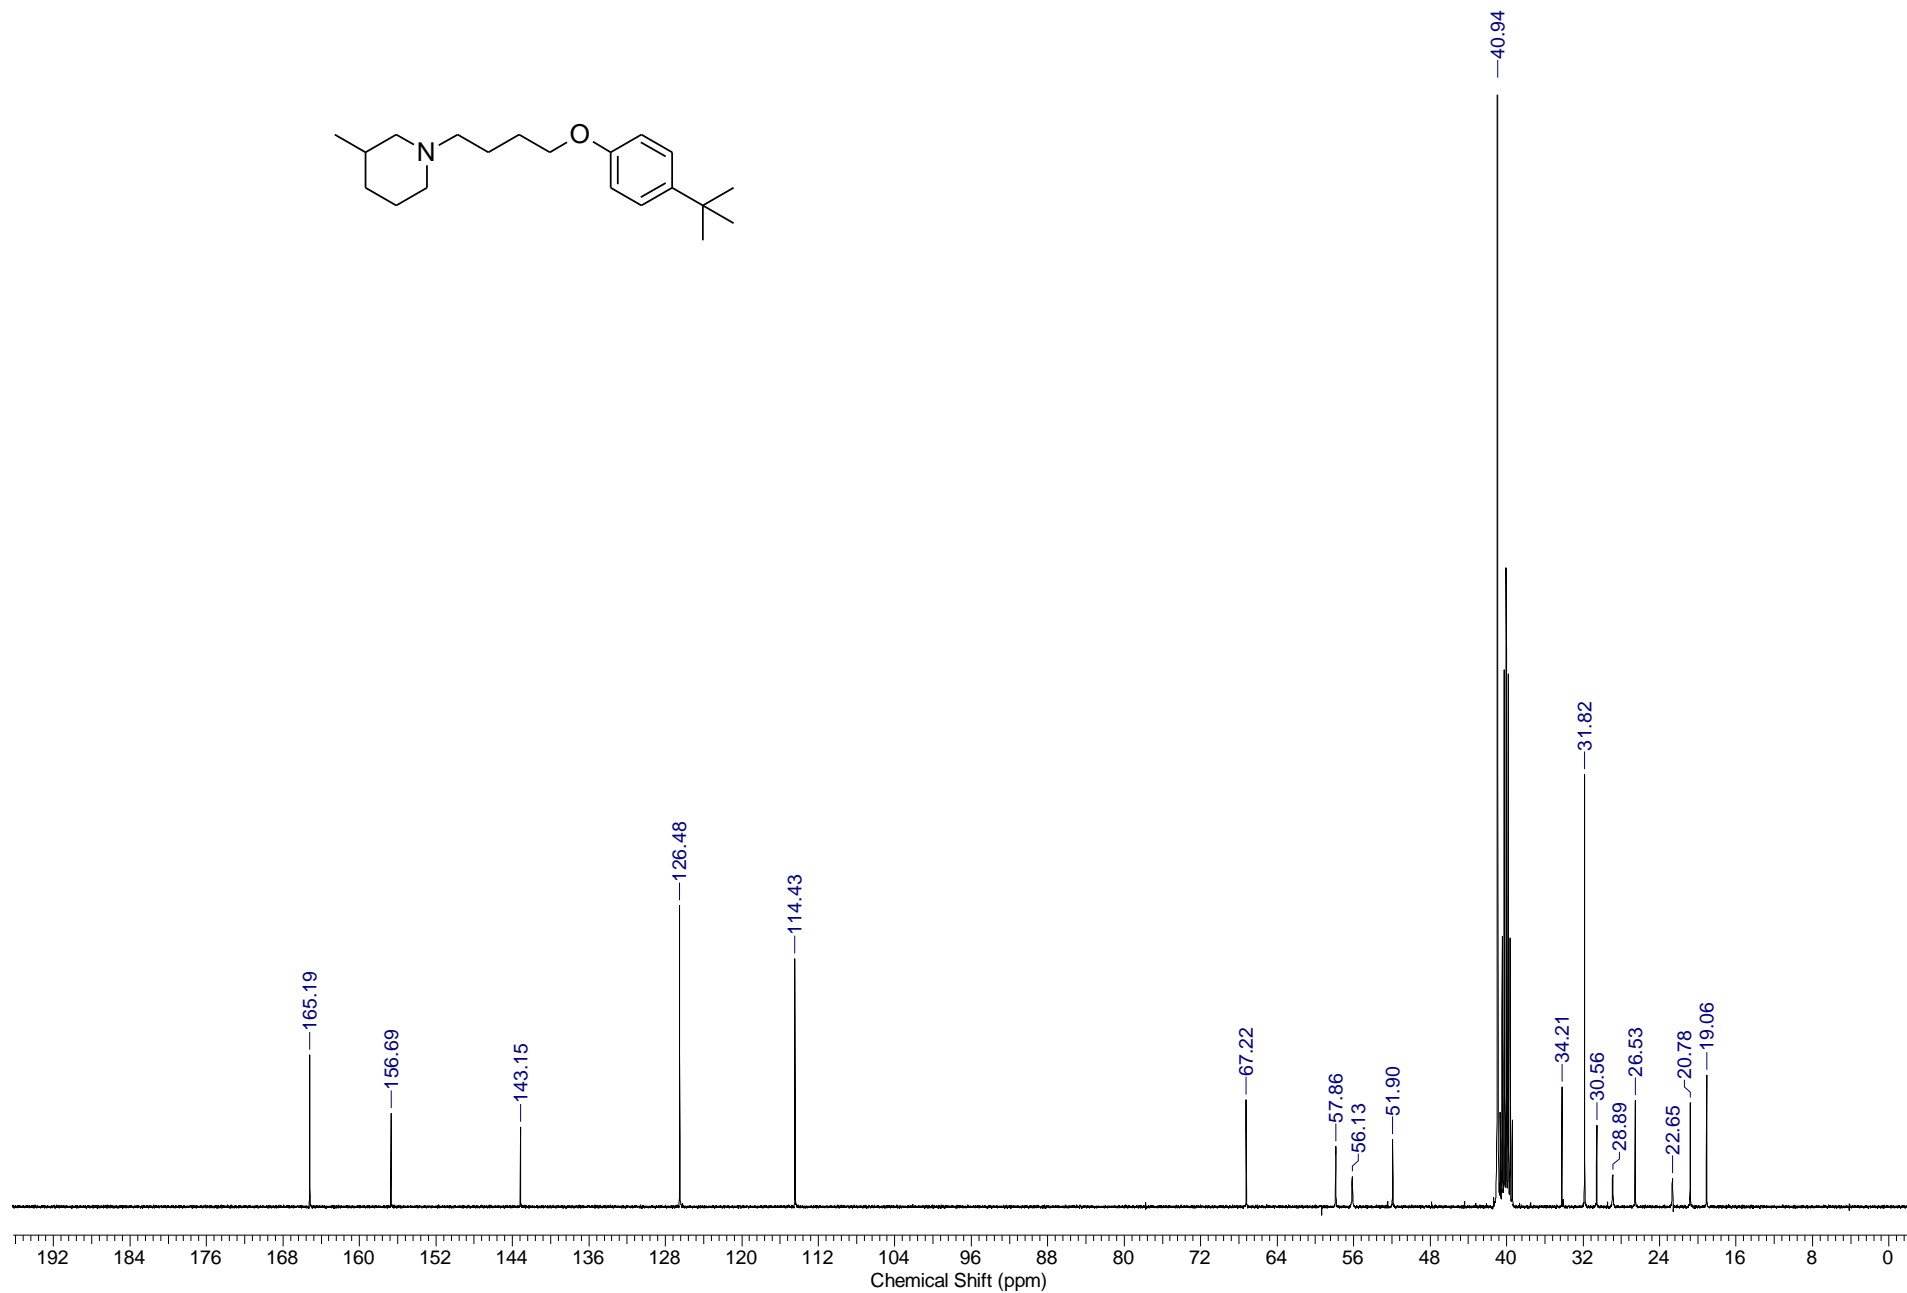

**Fig S18.** <sup>13</sup>C NMR spectrum of **13**

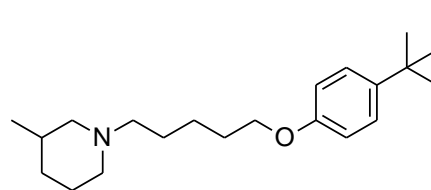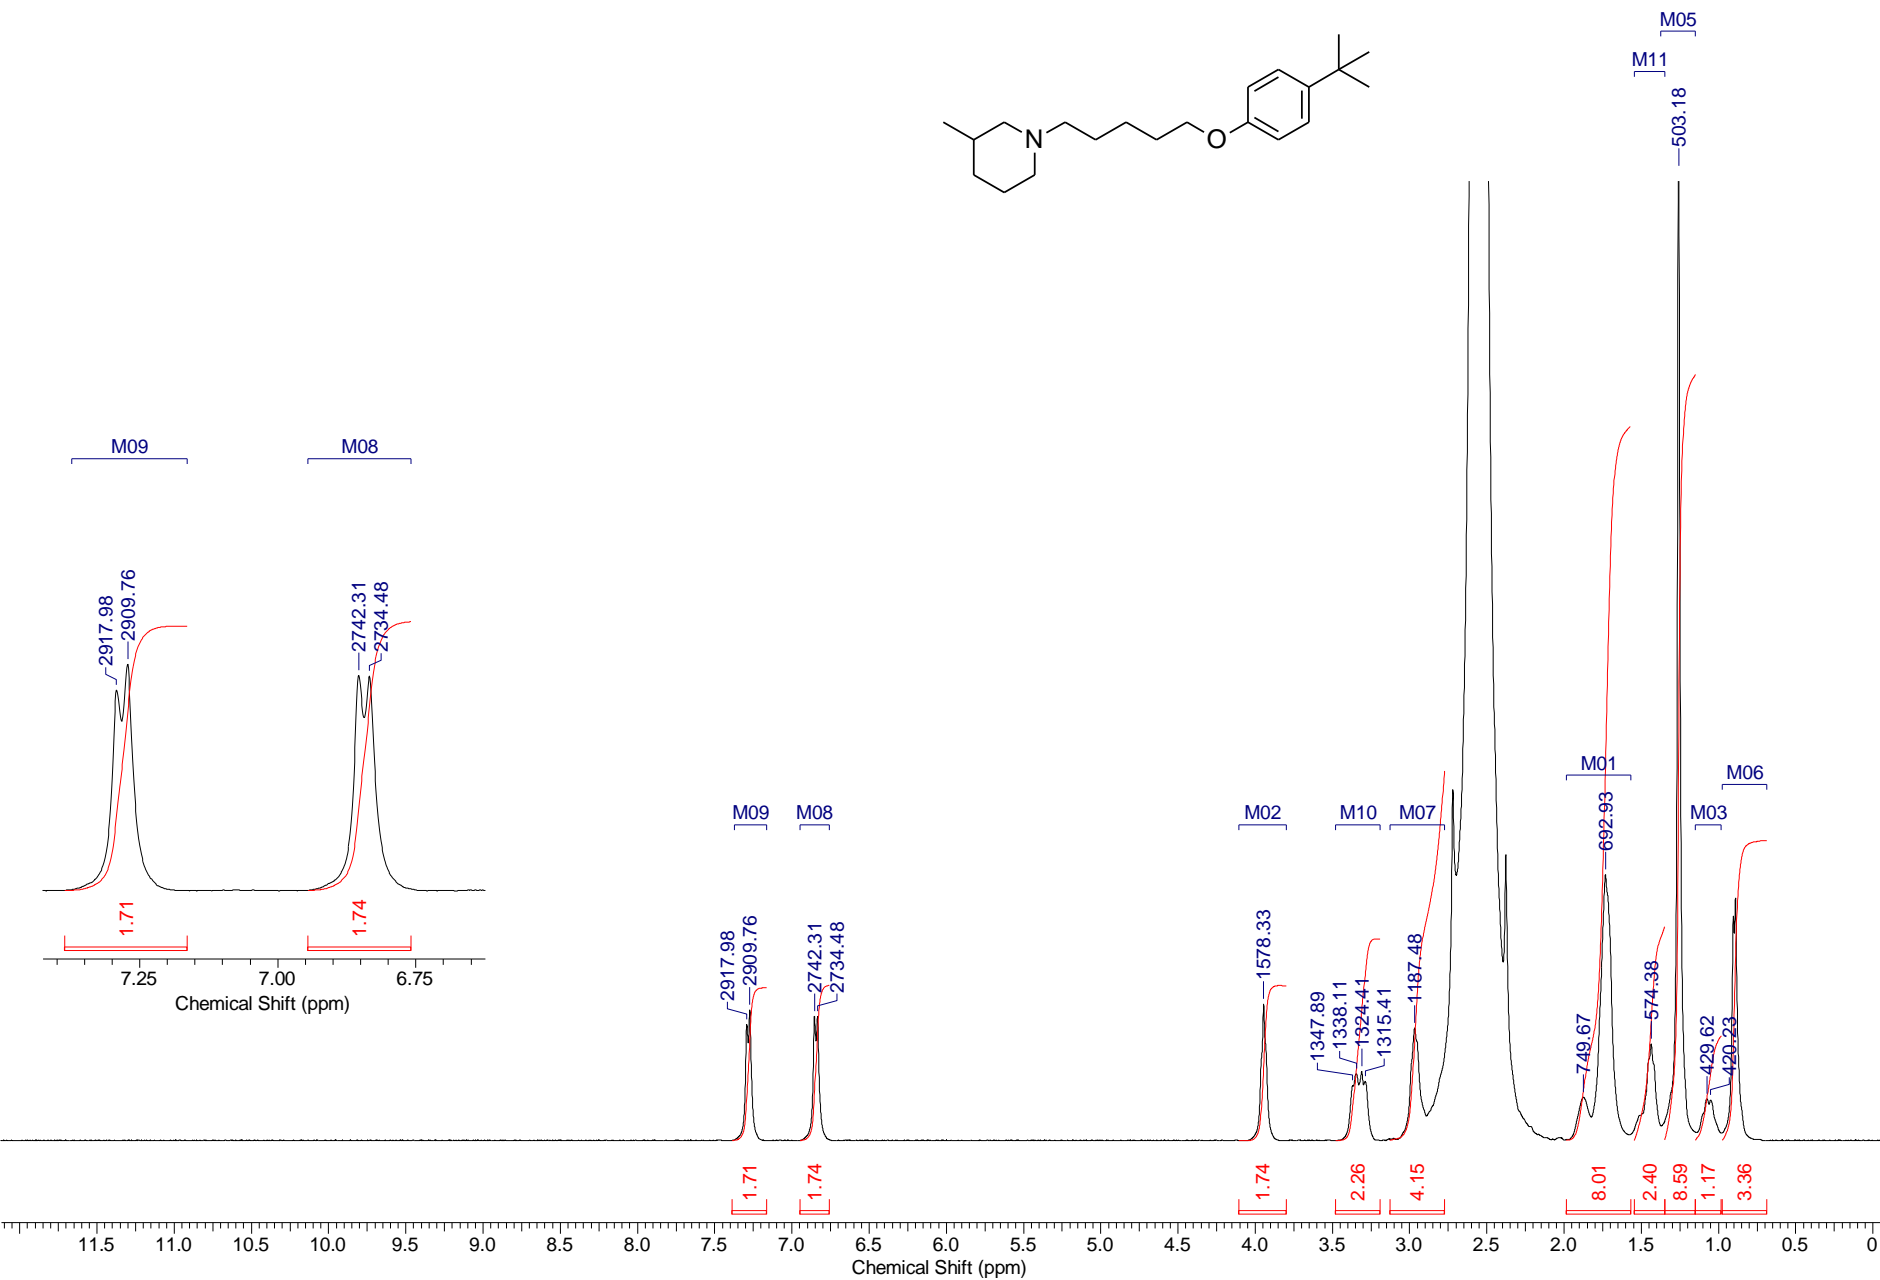

**Fig S19.**  $^1\text{H}$  NMR spectrum of **14**

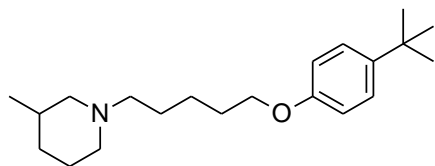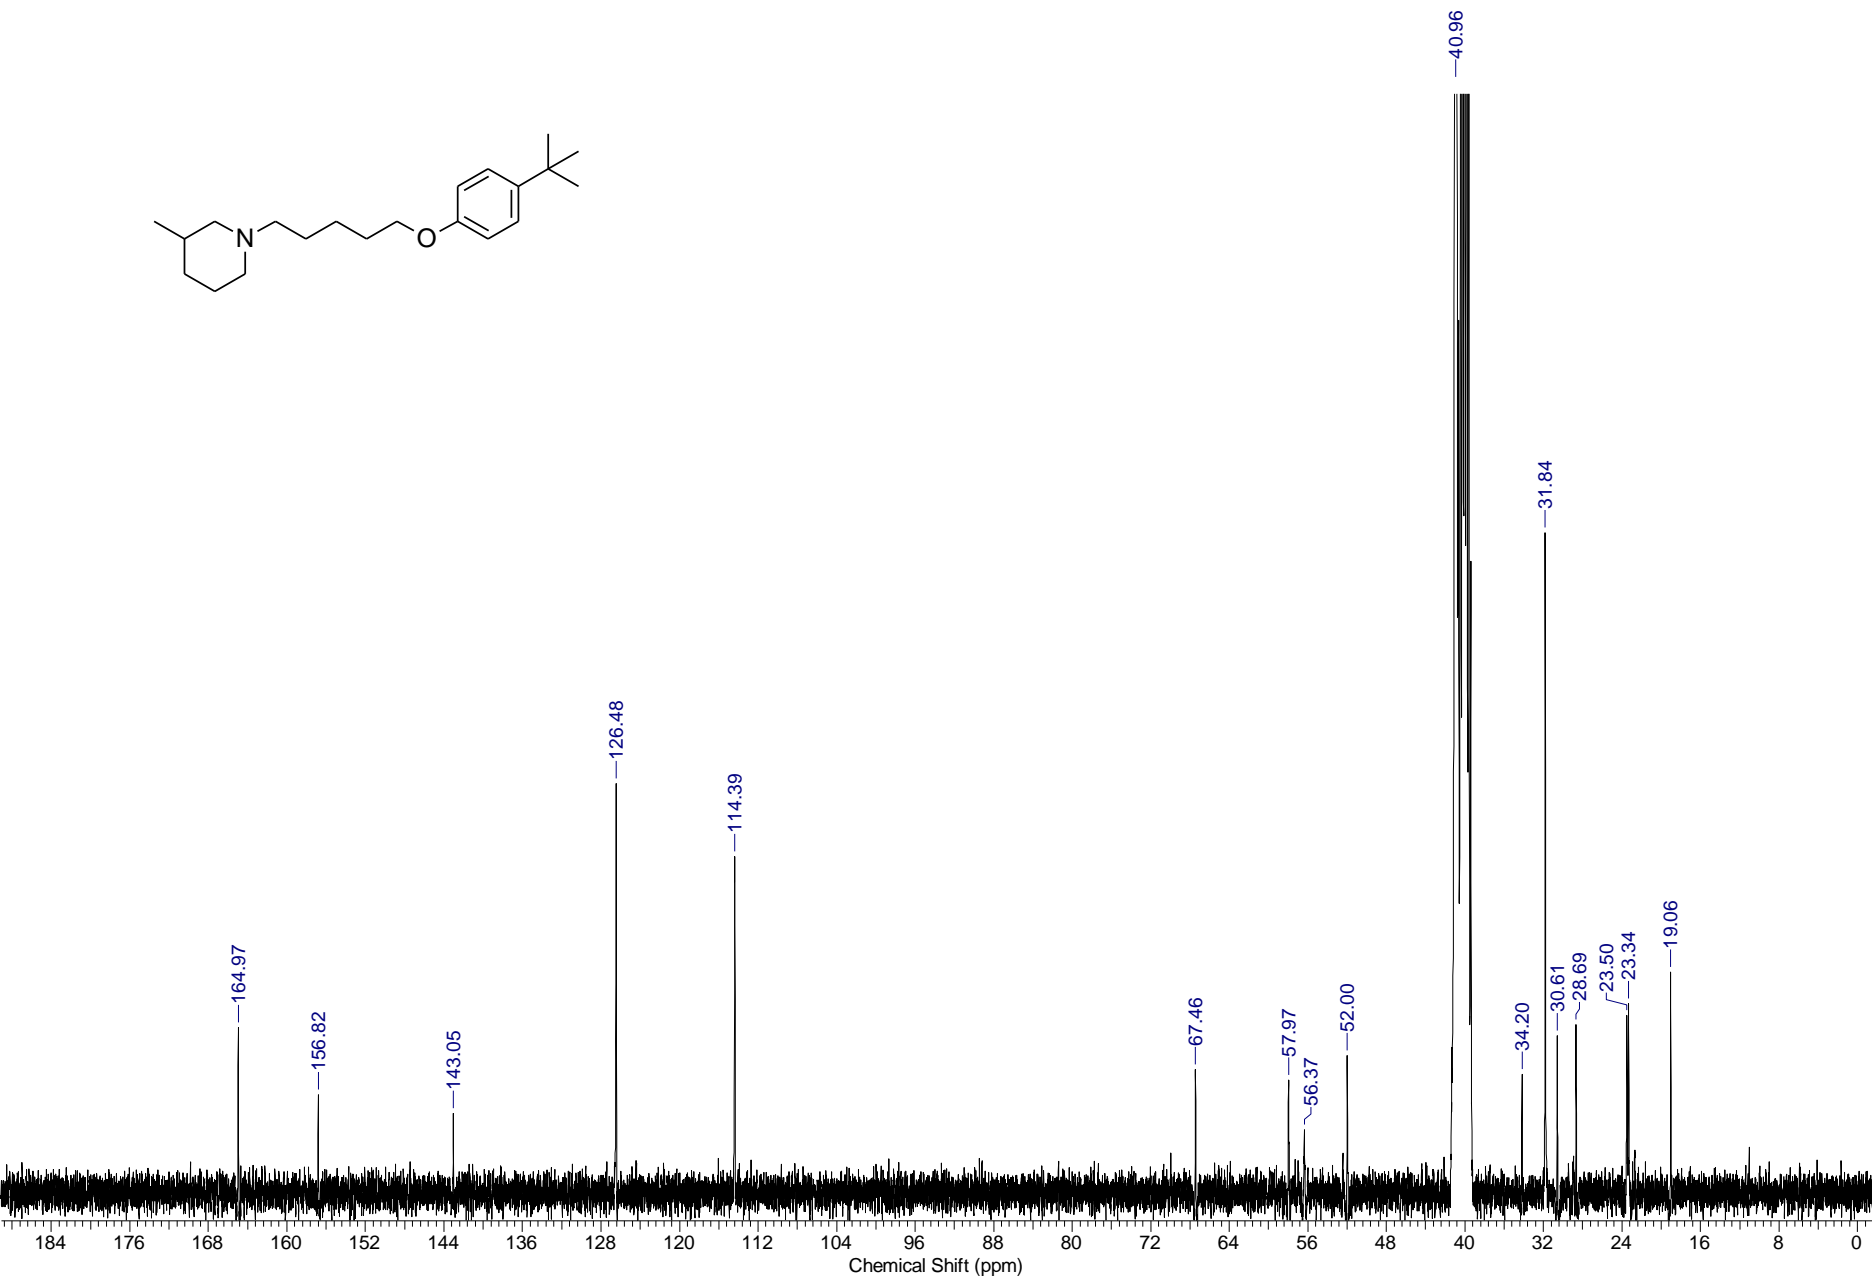

**Fig S20.** <sup>13</sup>C NMR spectrum of **14**



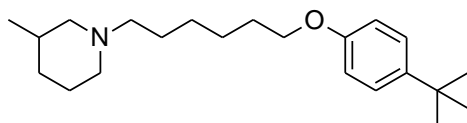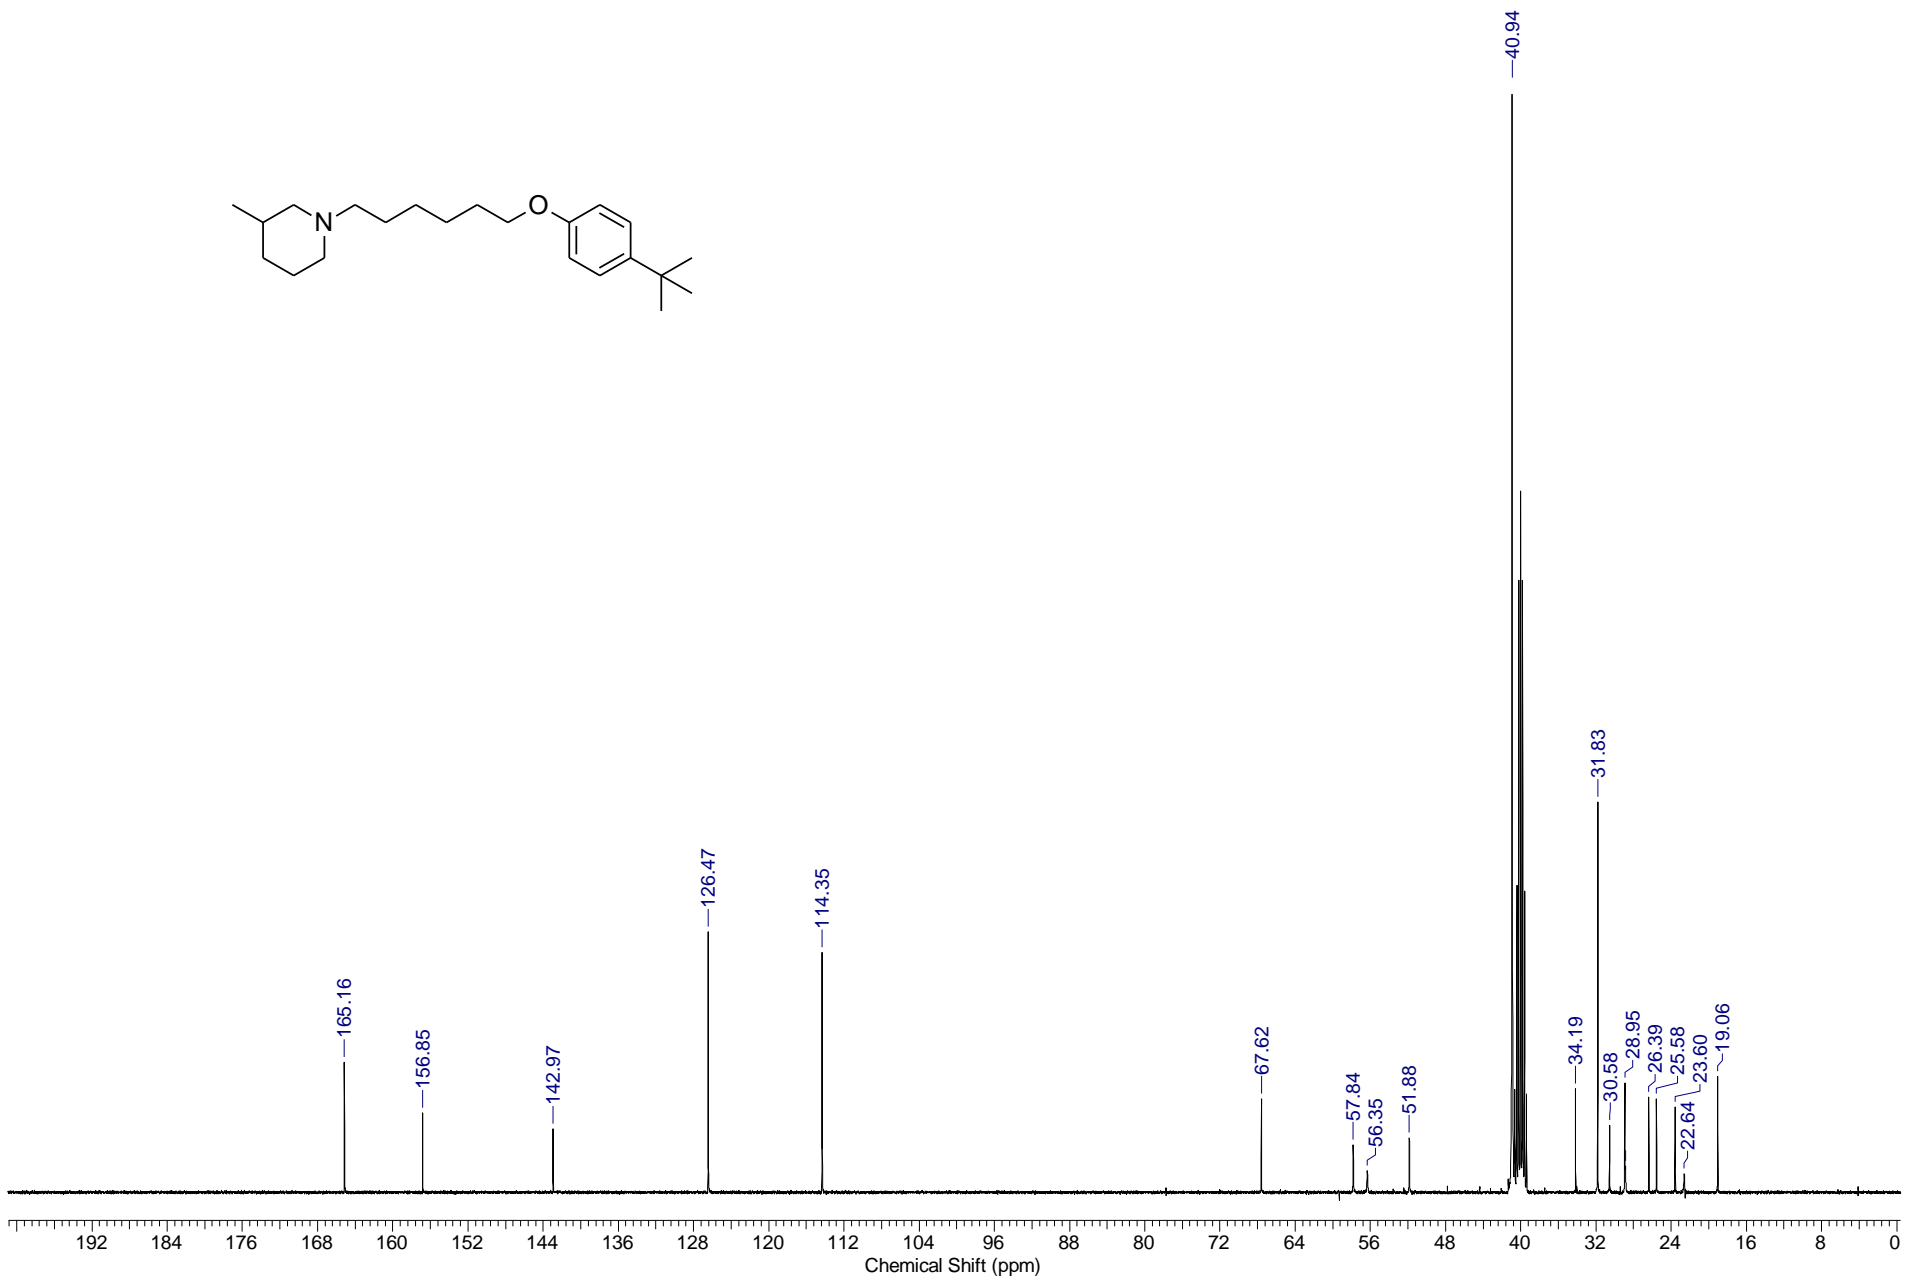

**Fig S22.** <sup>13</sup>C NMR spectrum of **15**

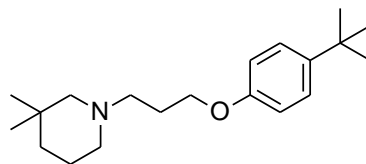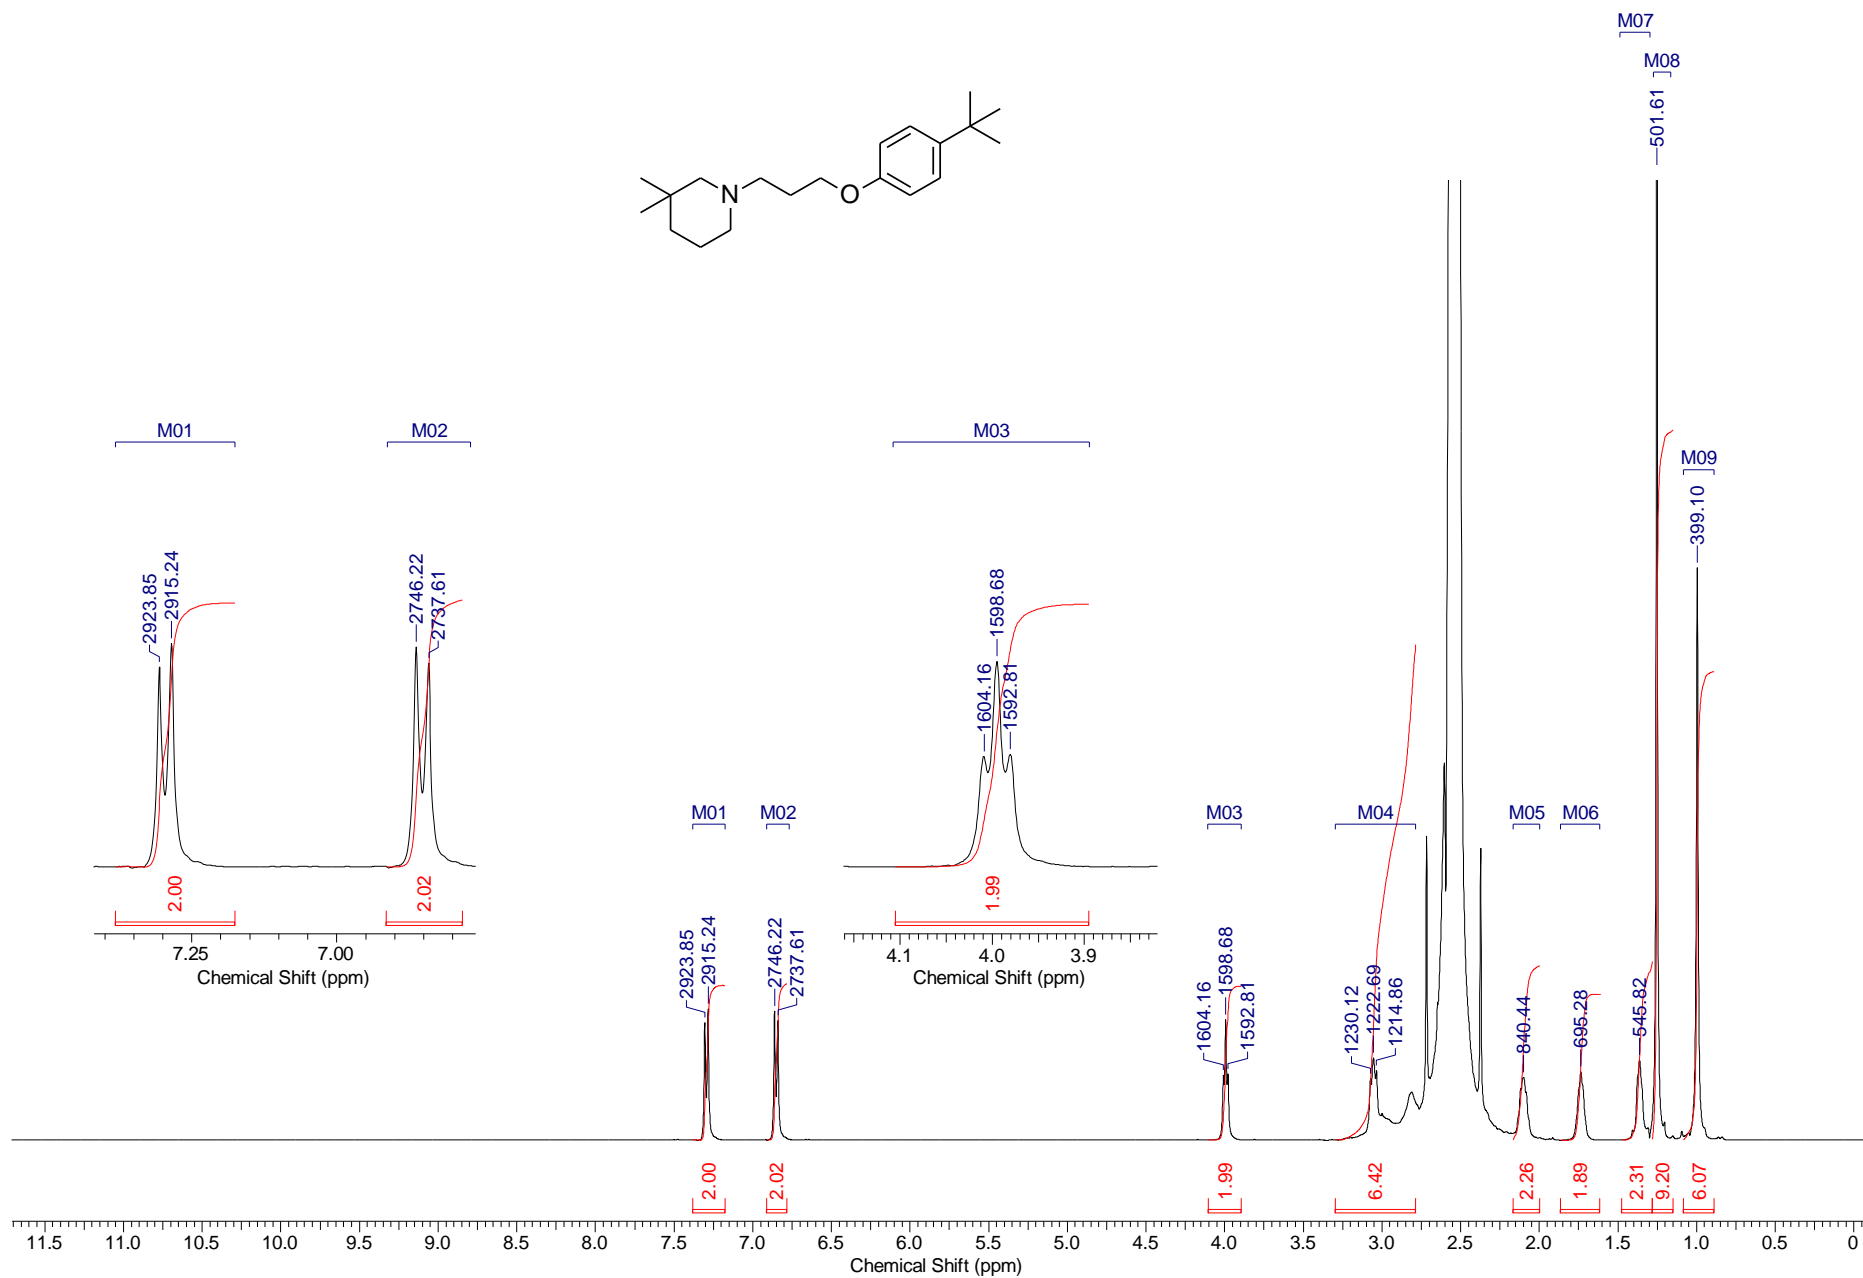

**Fig S23.**  $^1\text{H}$  NMR spectrum of **16**



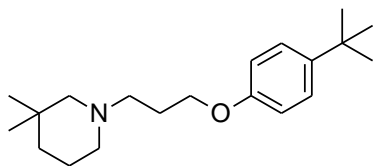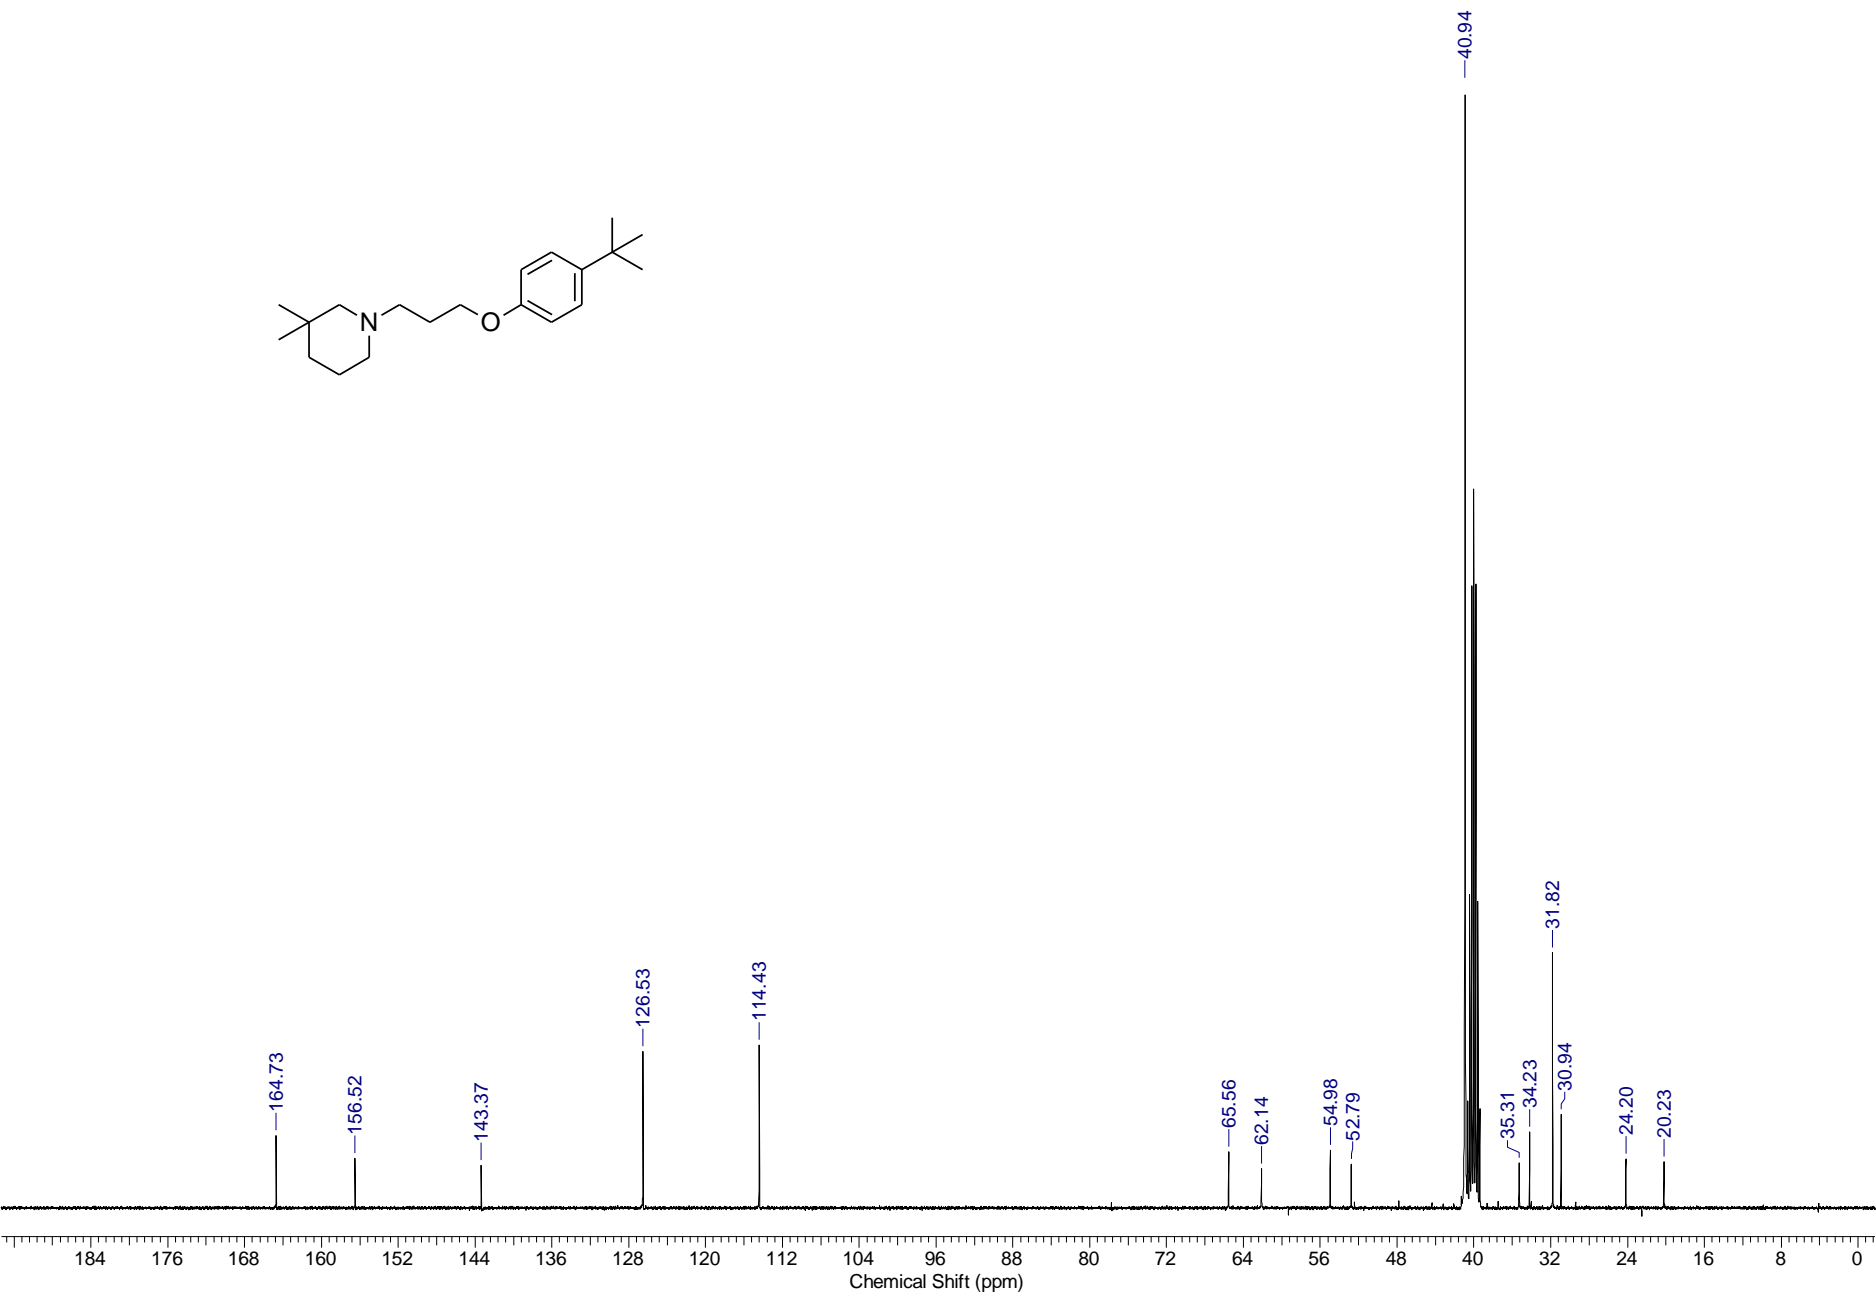

**Fig S24.** <sup>13</sup>C NMR spectrum of **16**

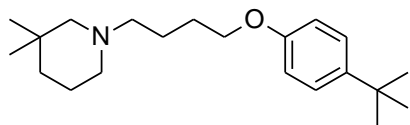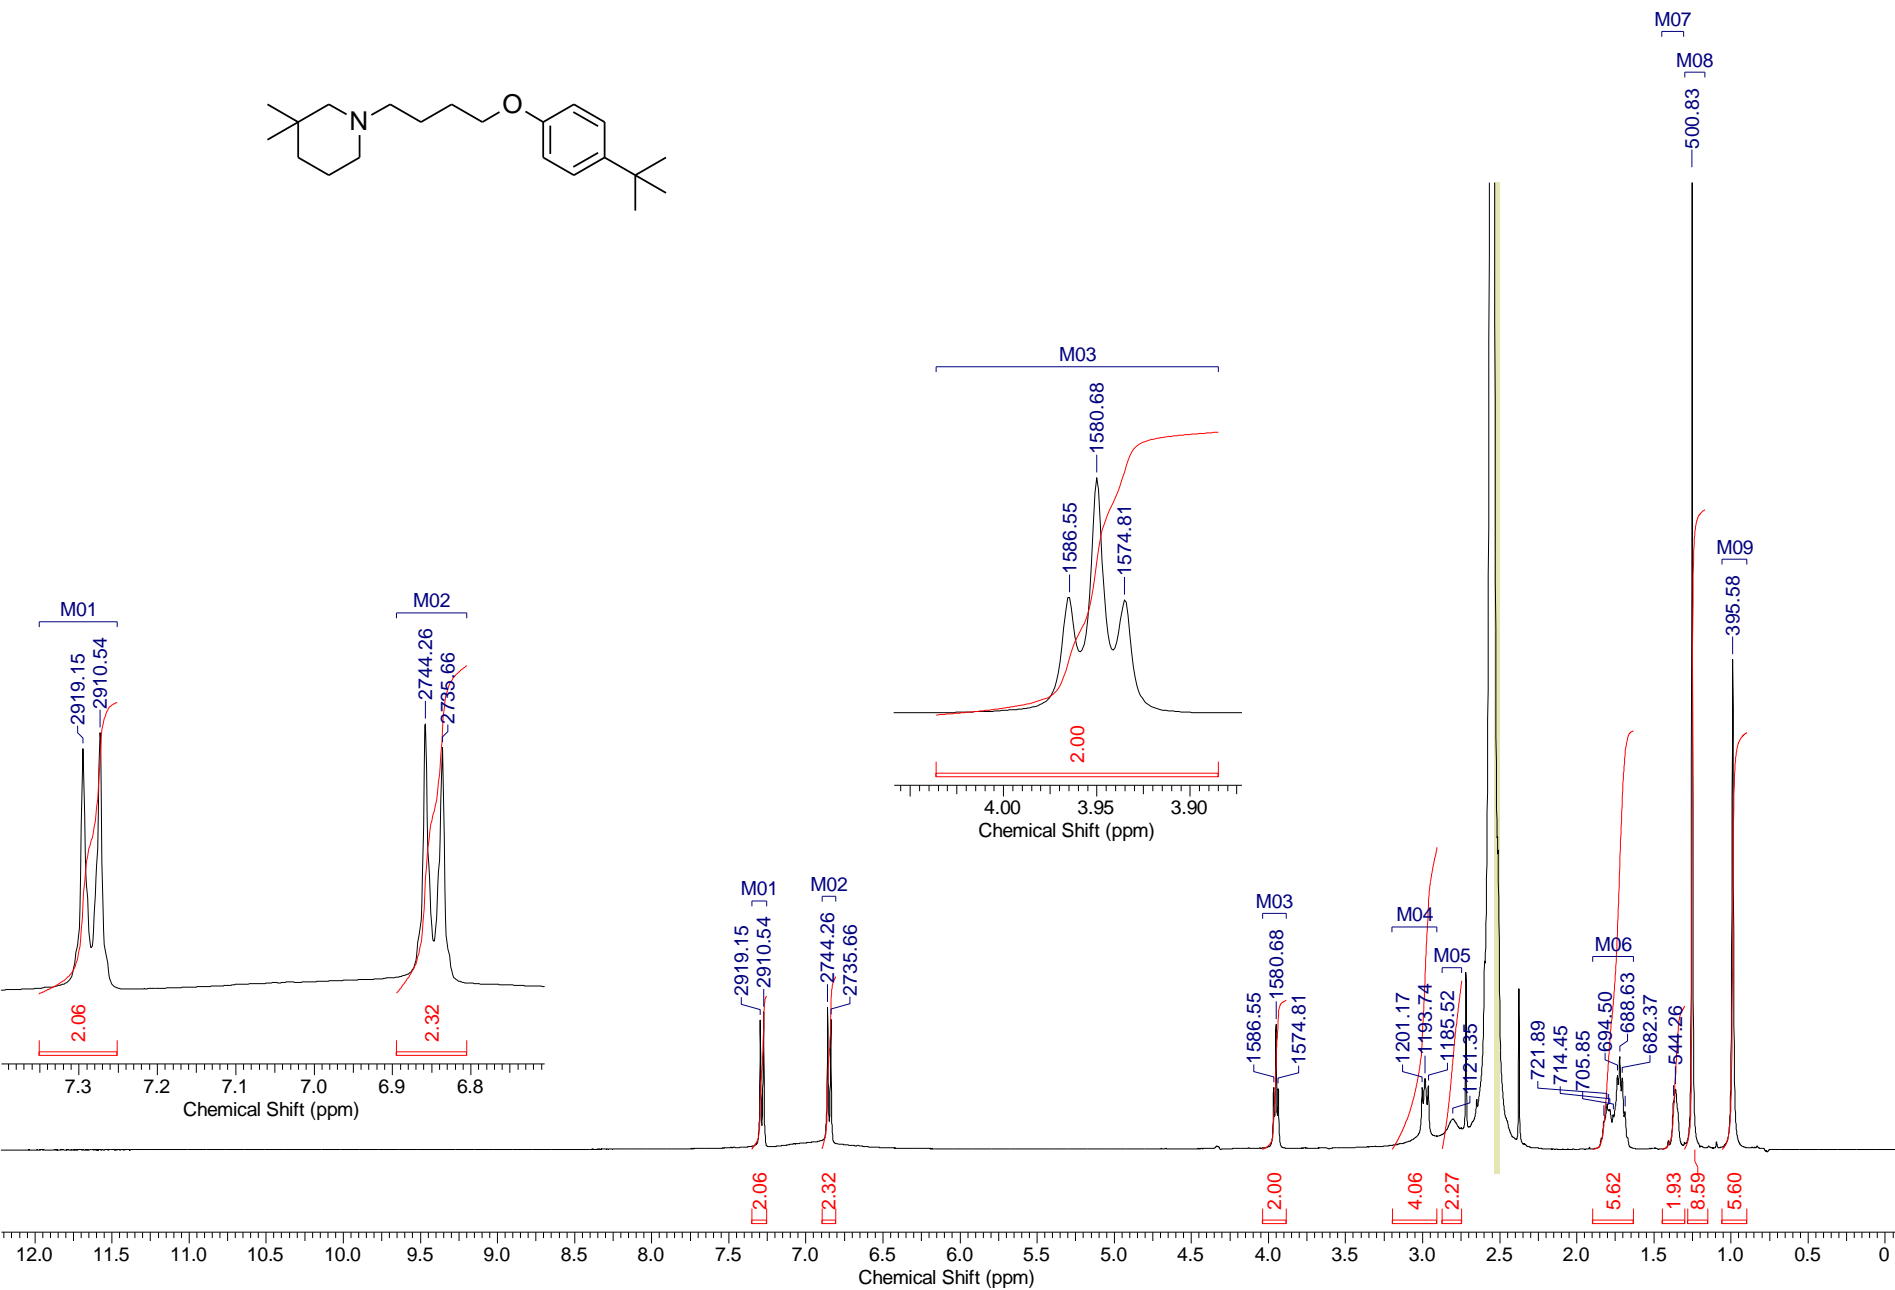

**Fig S25.**  $^1\text{H}$  NMR spectrum of **17**

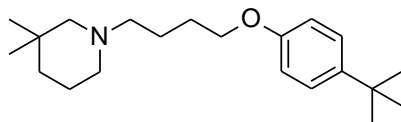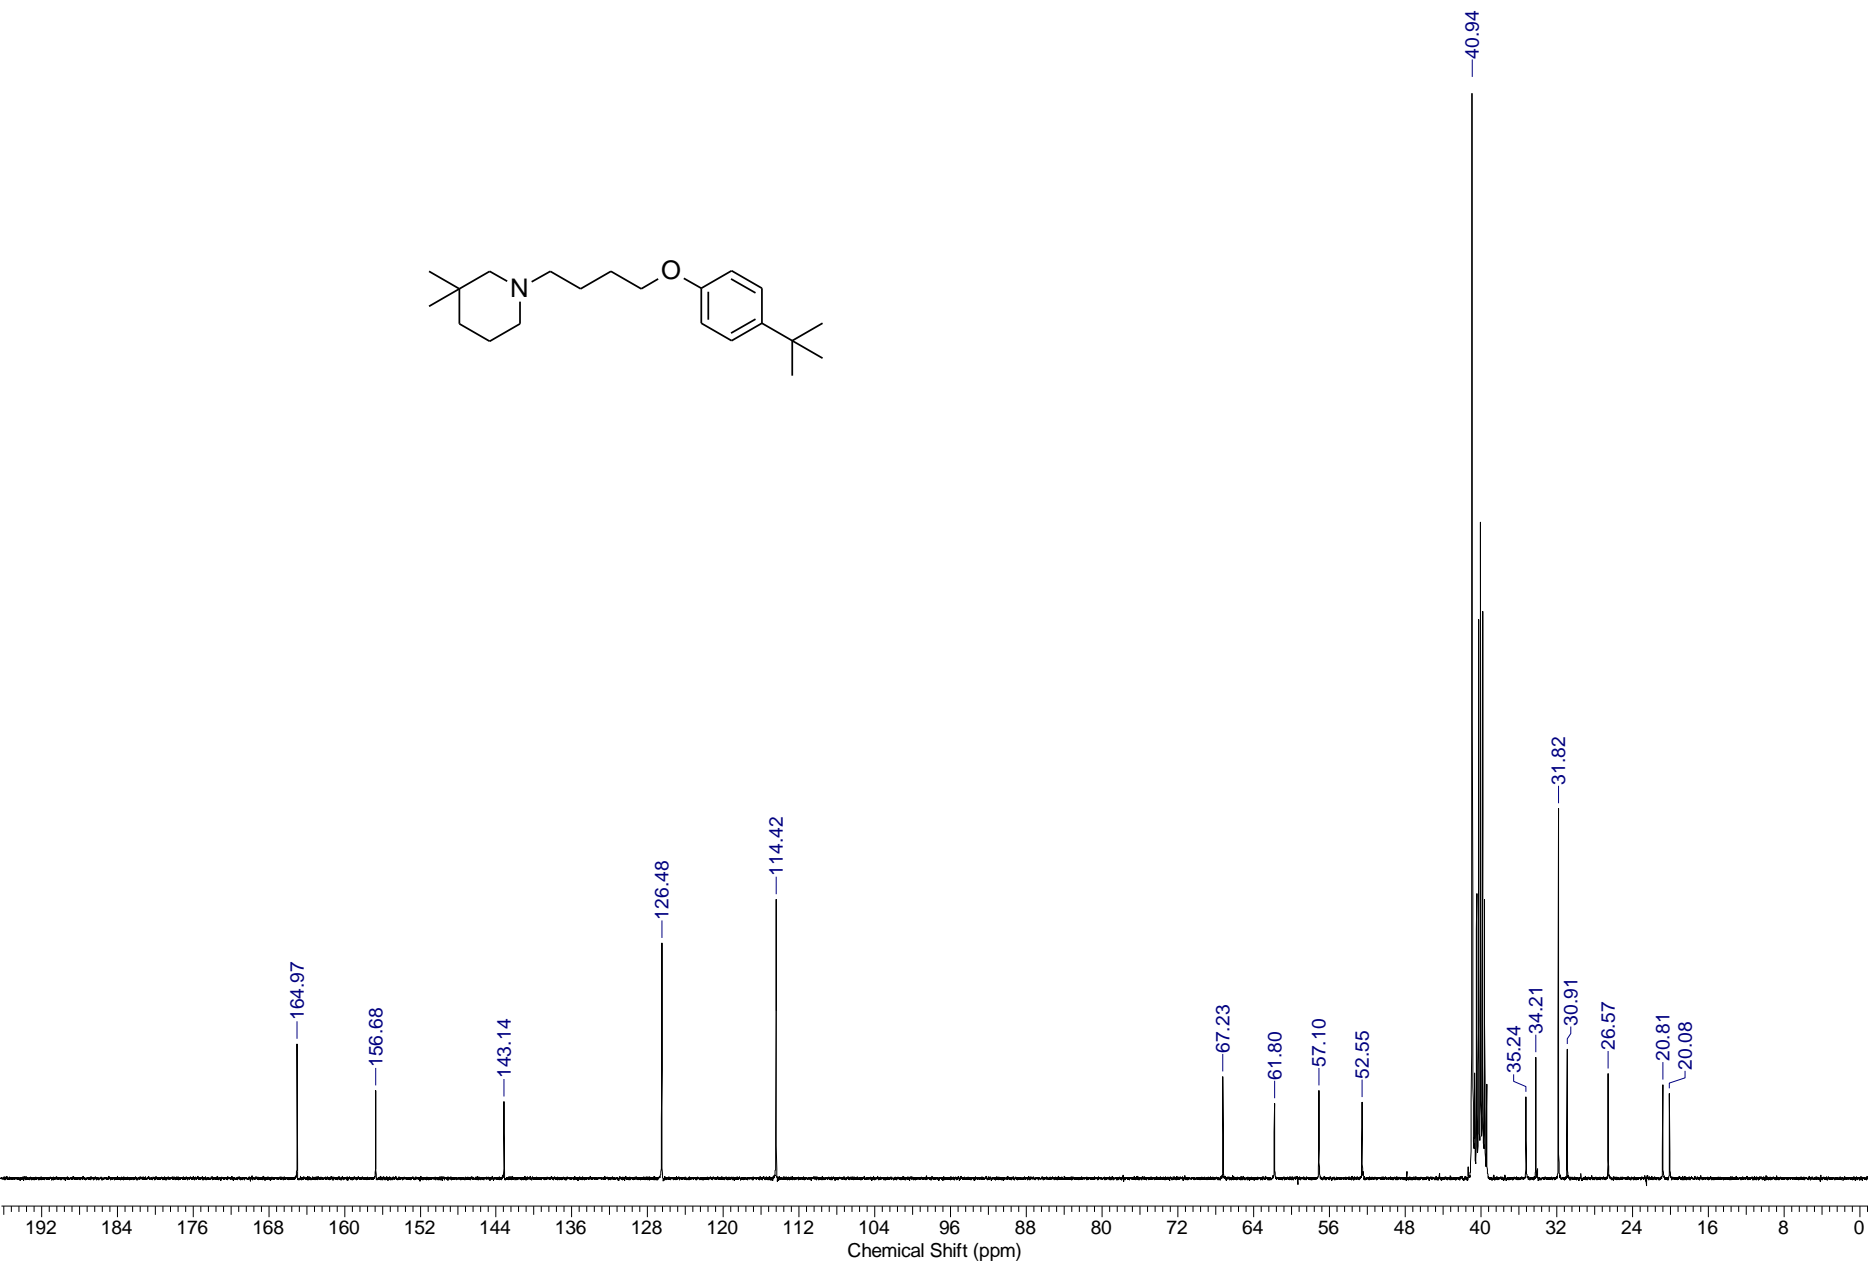

**Fig S26.** <sup>13</sup>C NMR spectrum of **17**

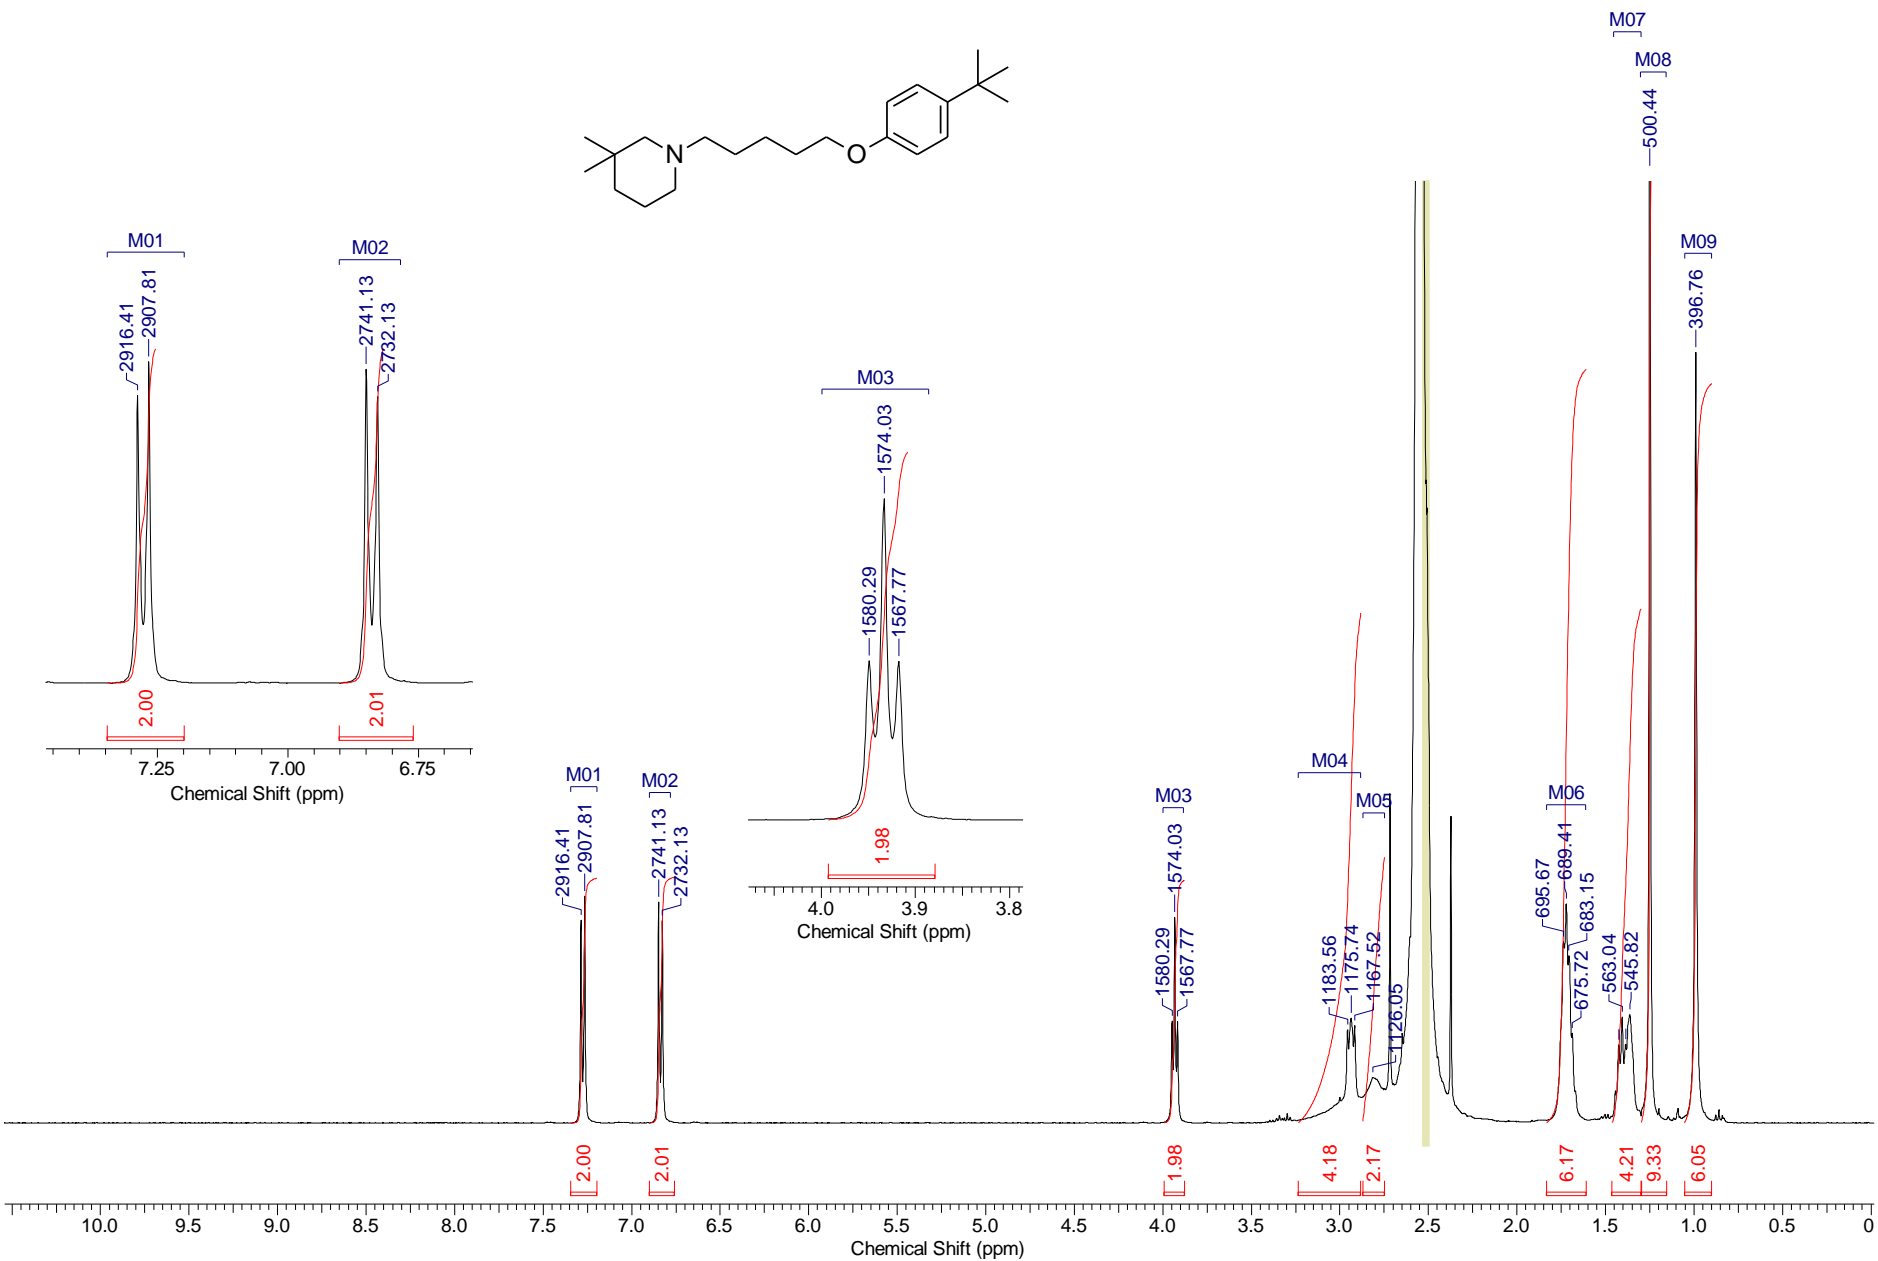

**Fig S27.**  $^1\text{H}$  NMR spectrum of **18**

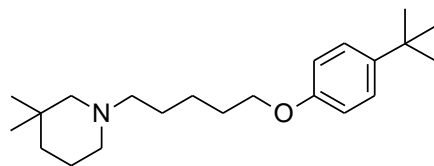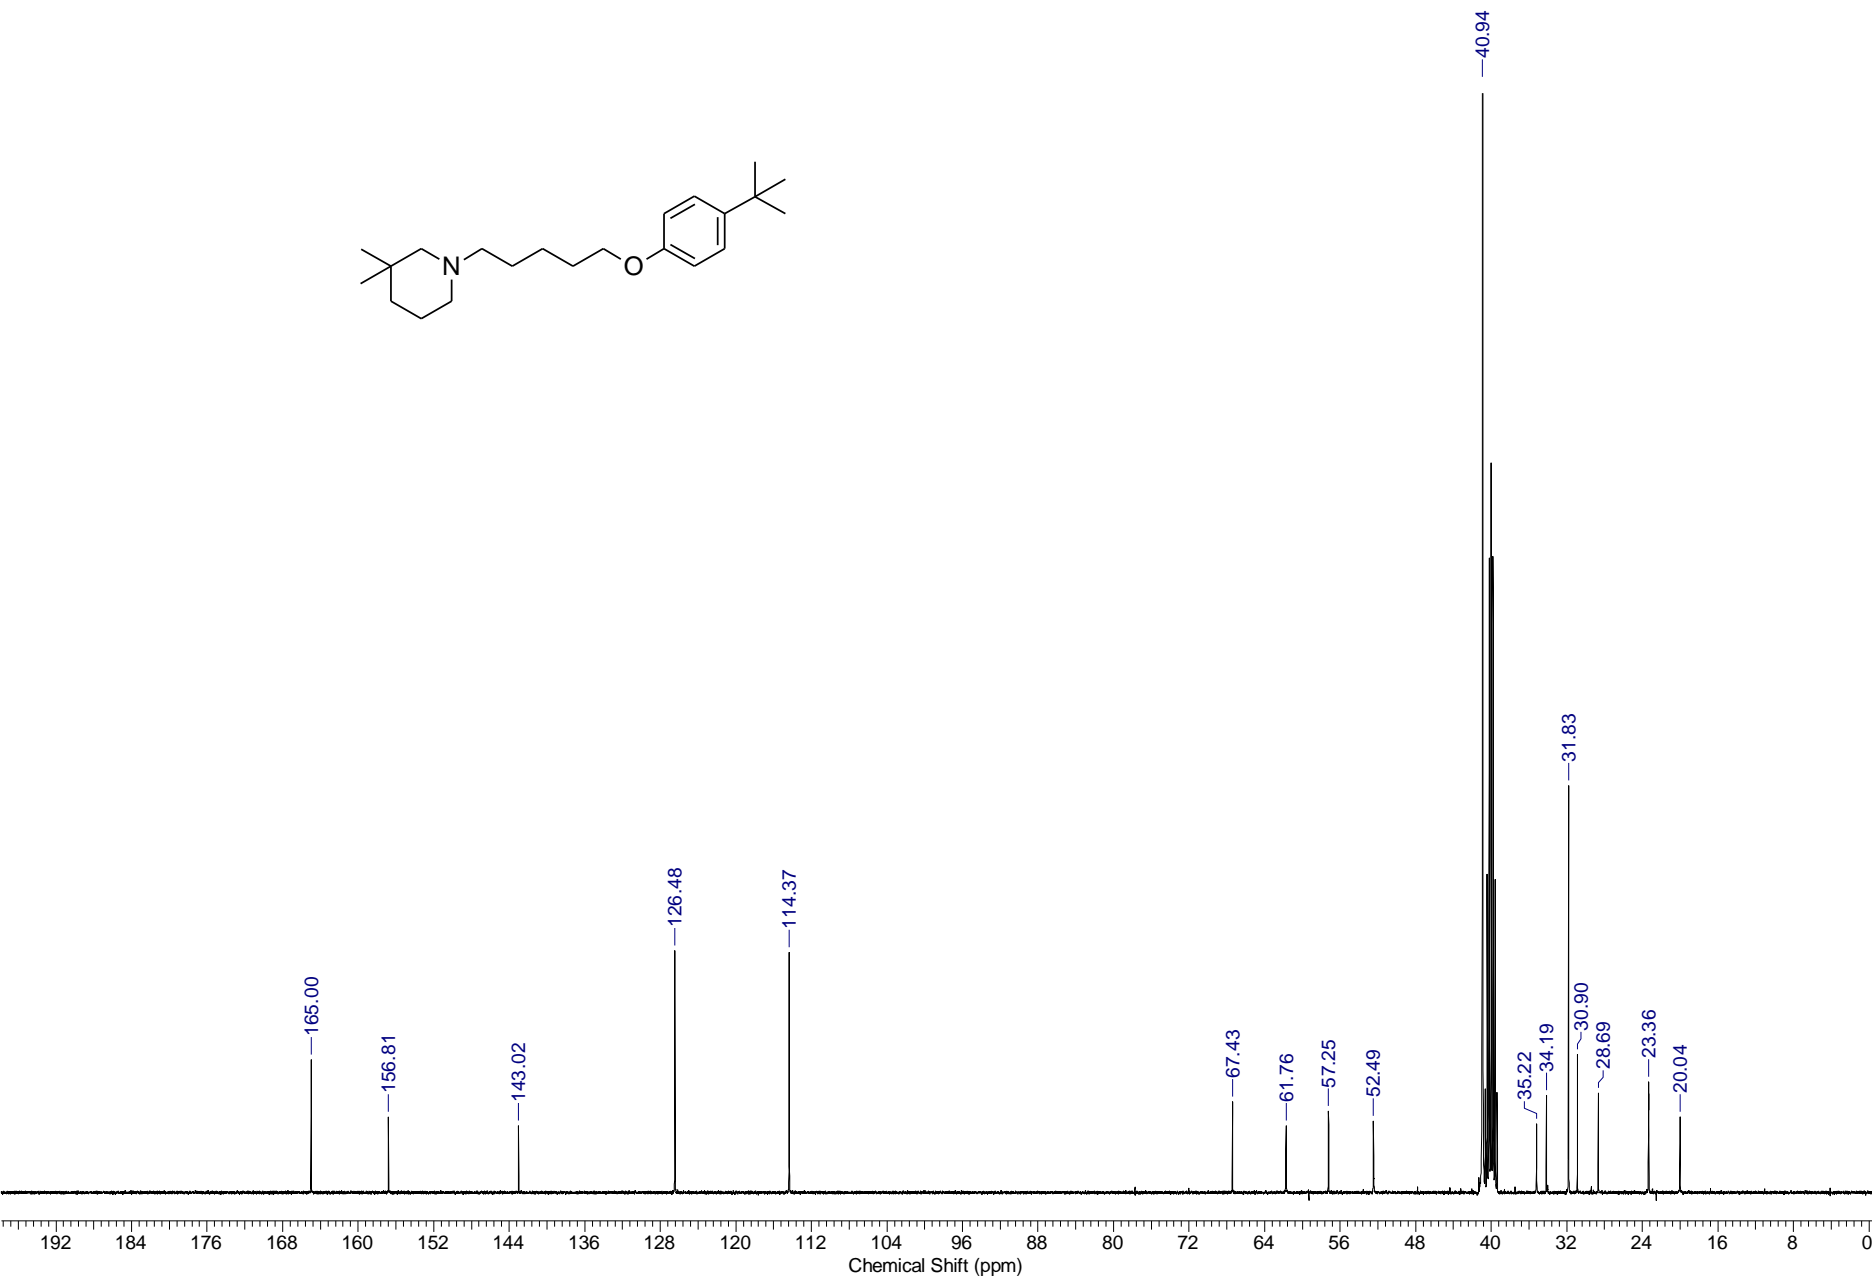

**Fig S28.** <sup>13</sup>C NMR spectrum of **18**

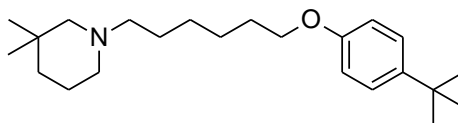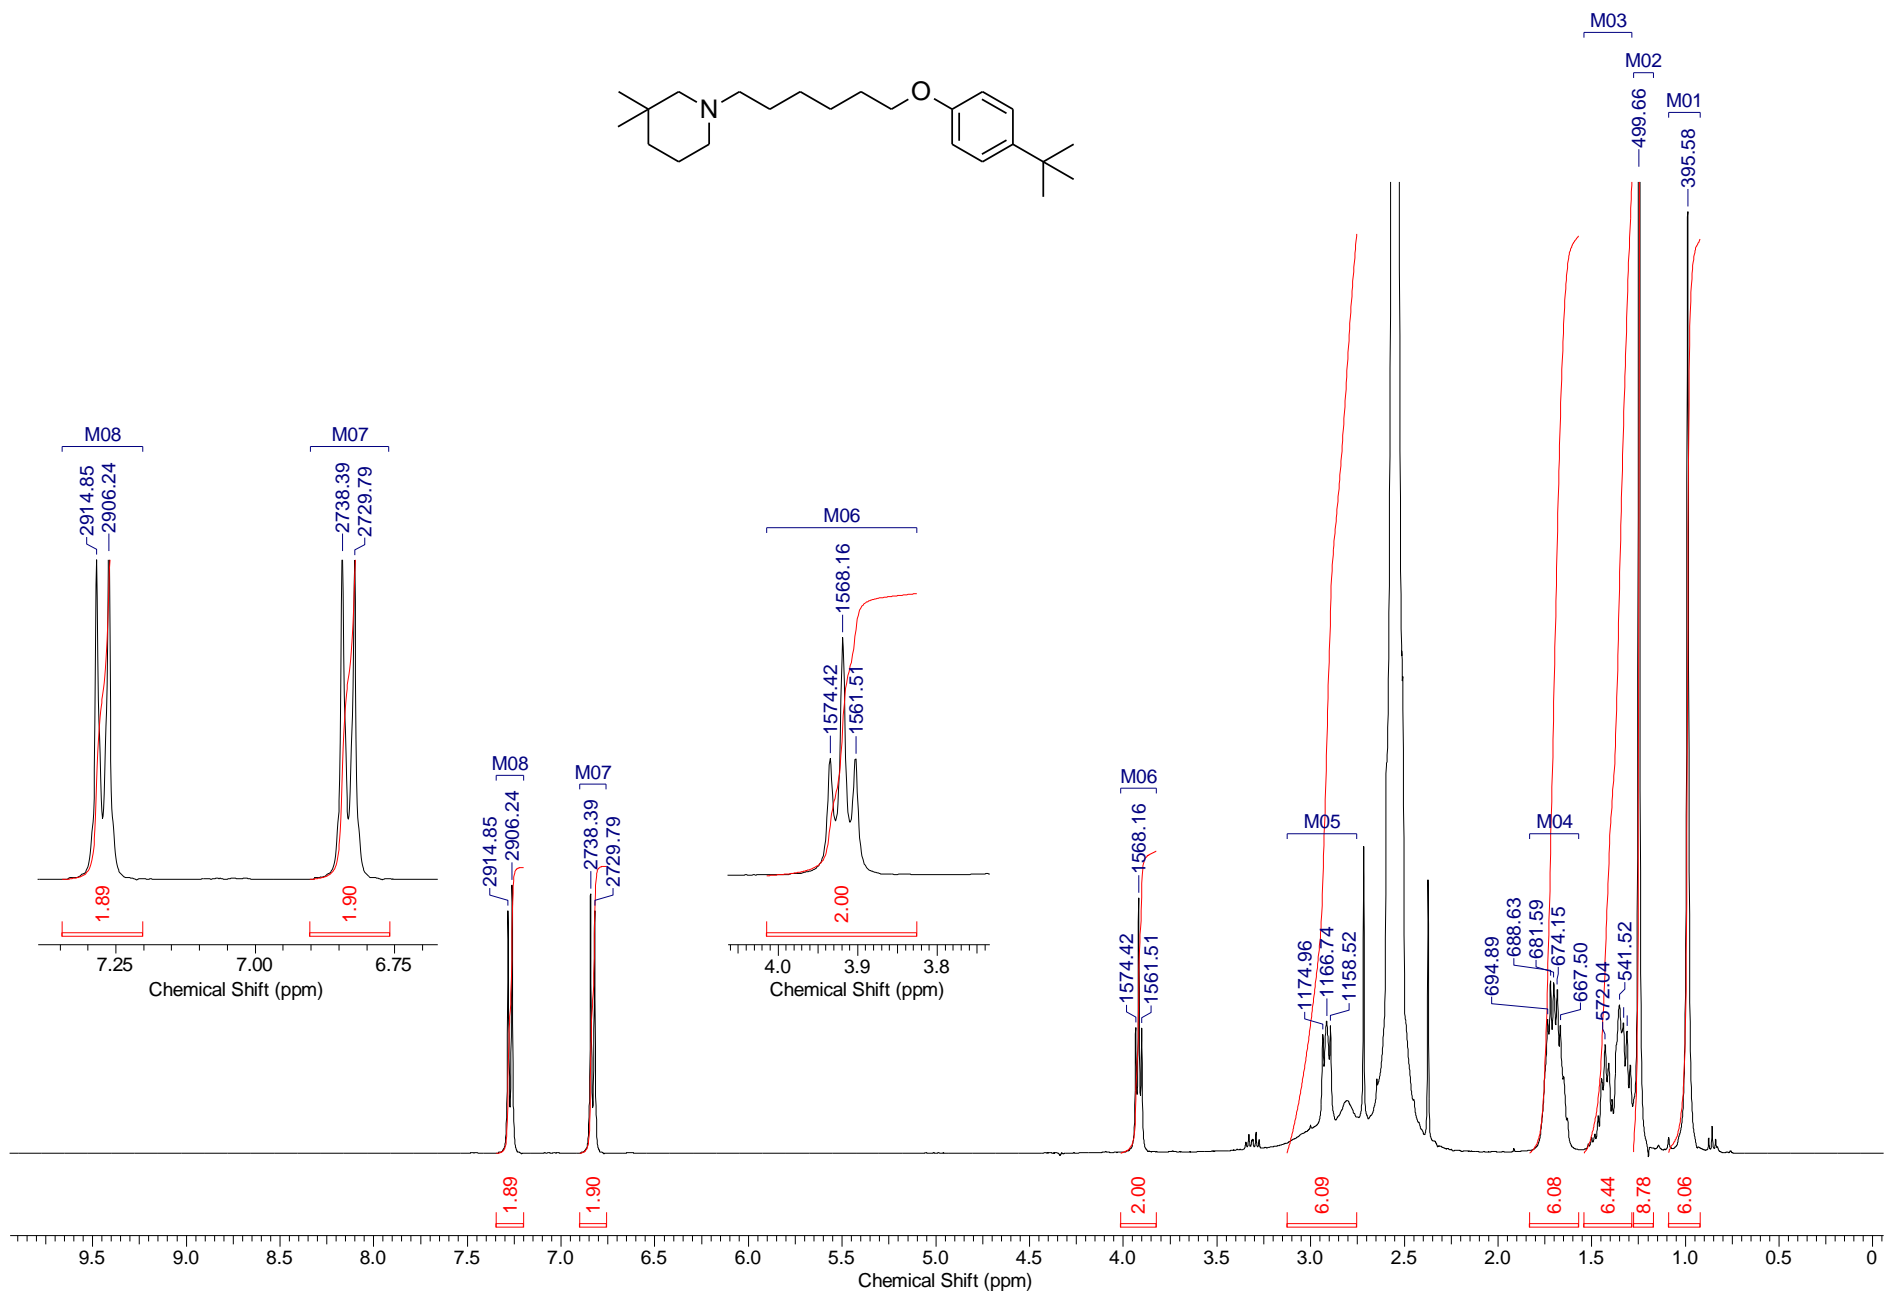

**Fig S29.** <sup>1</sup>H NMR spectrum of **19**

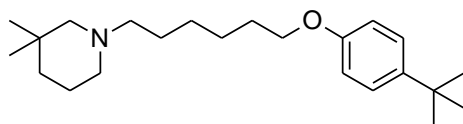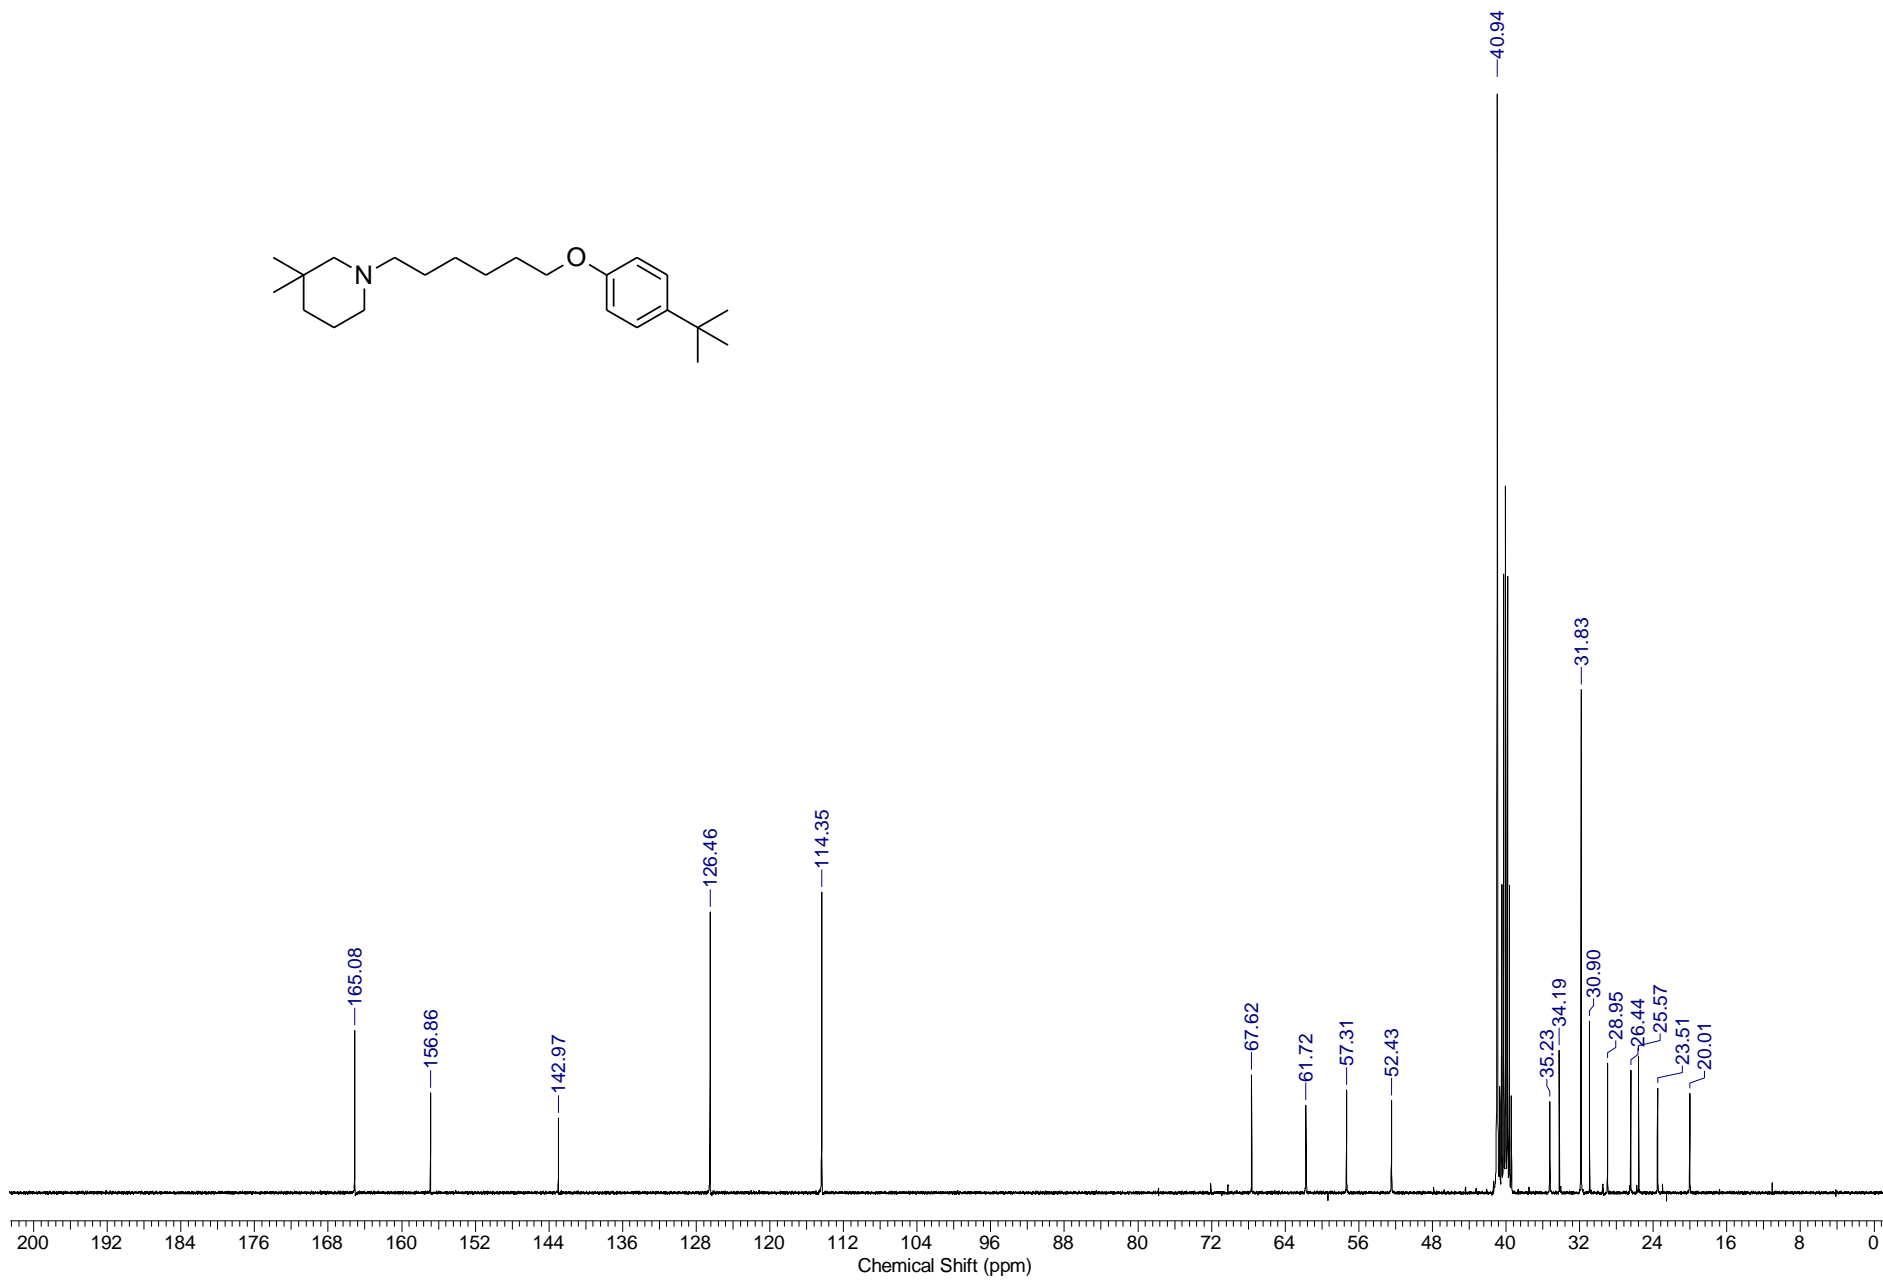

**Fig S30.** <sup>13</sup>C NMR spectrum of **19**

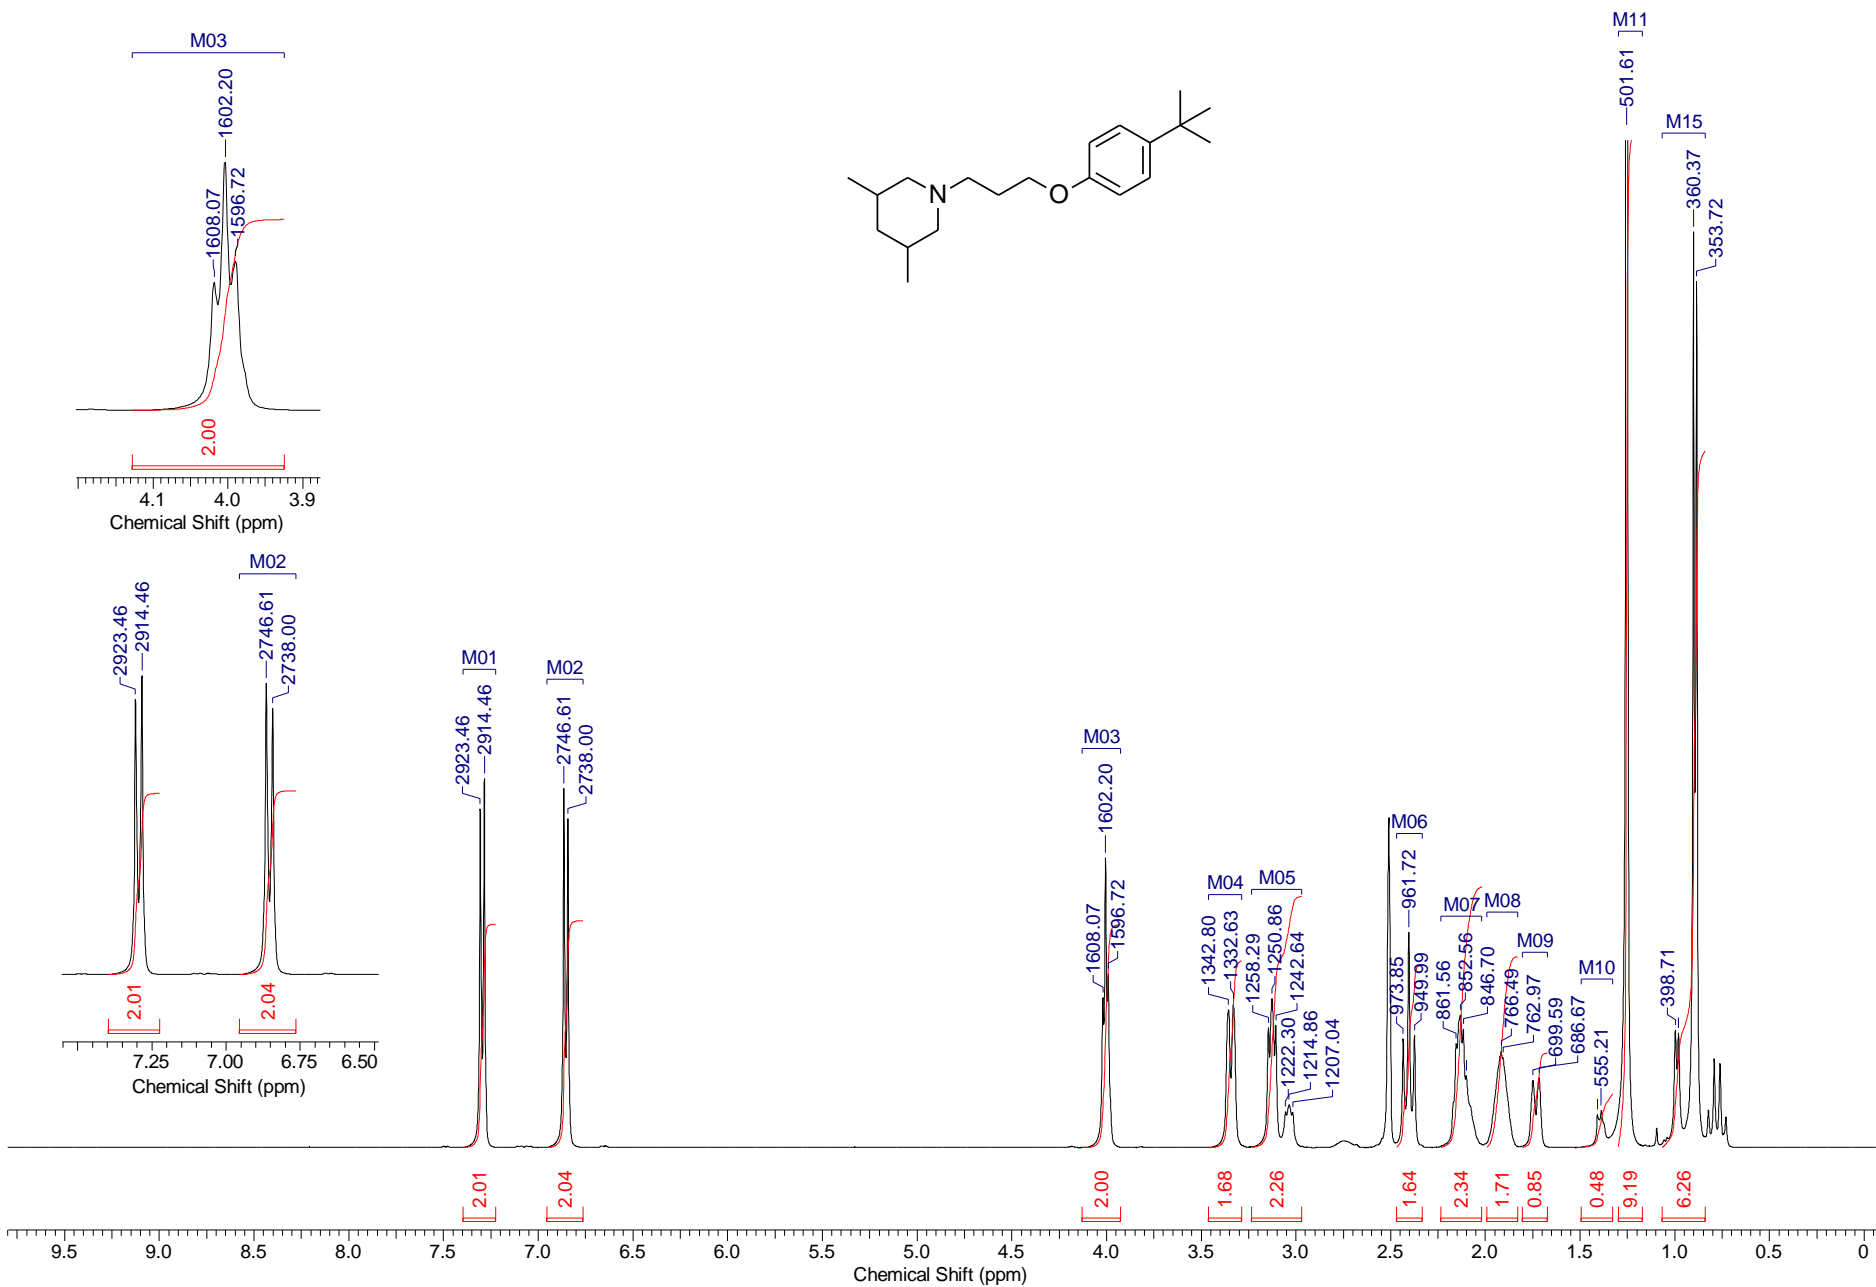

**Fig S31.** <sup>1</sup>H NMR spectrum of **20**



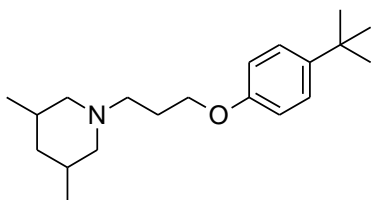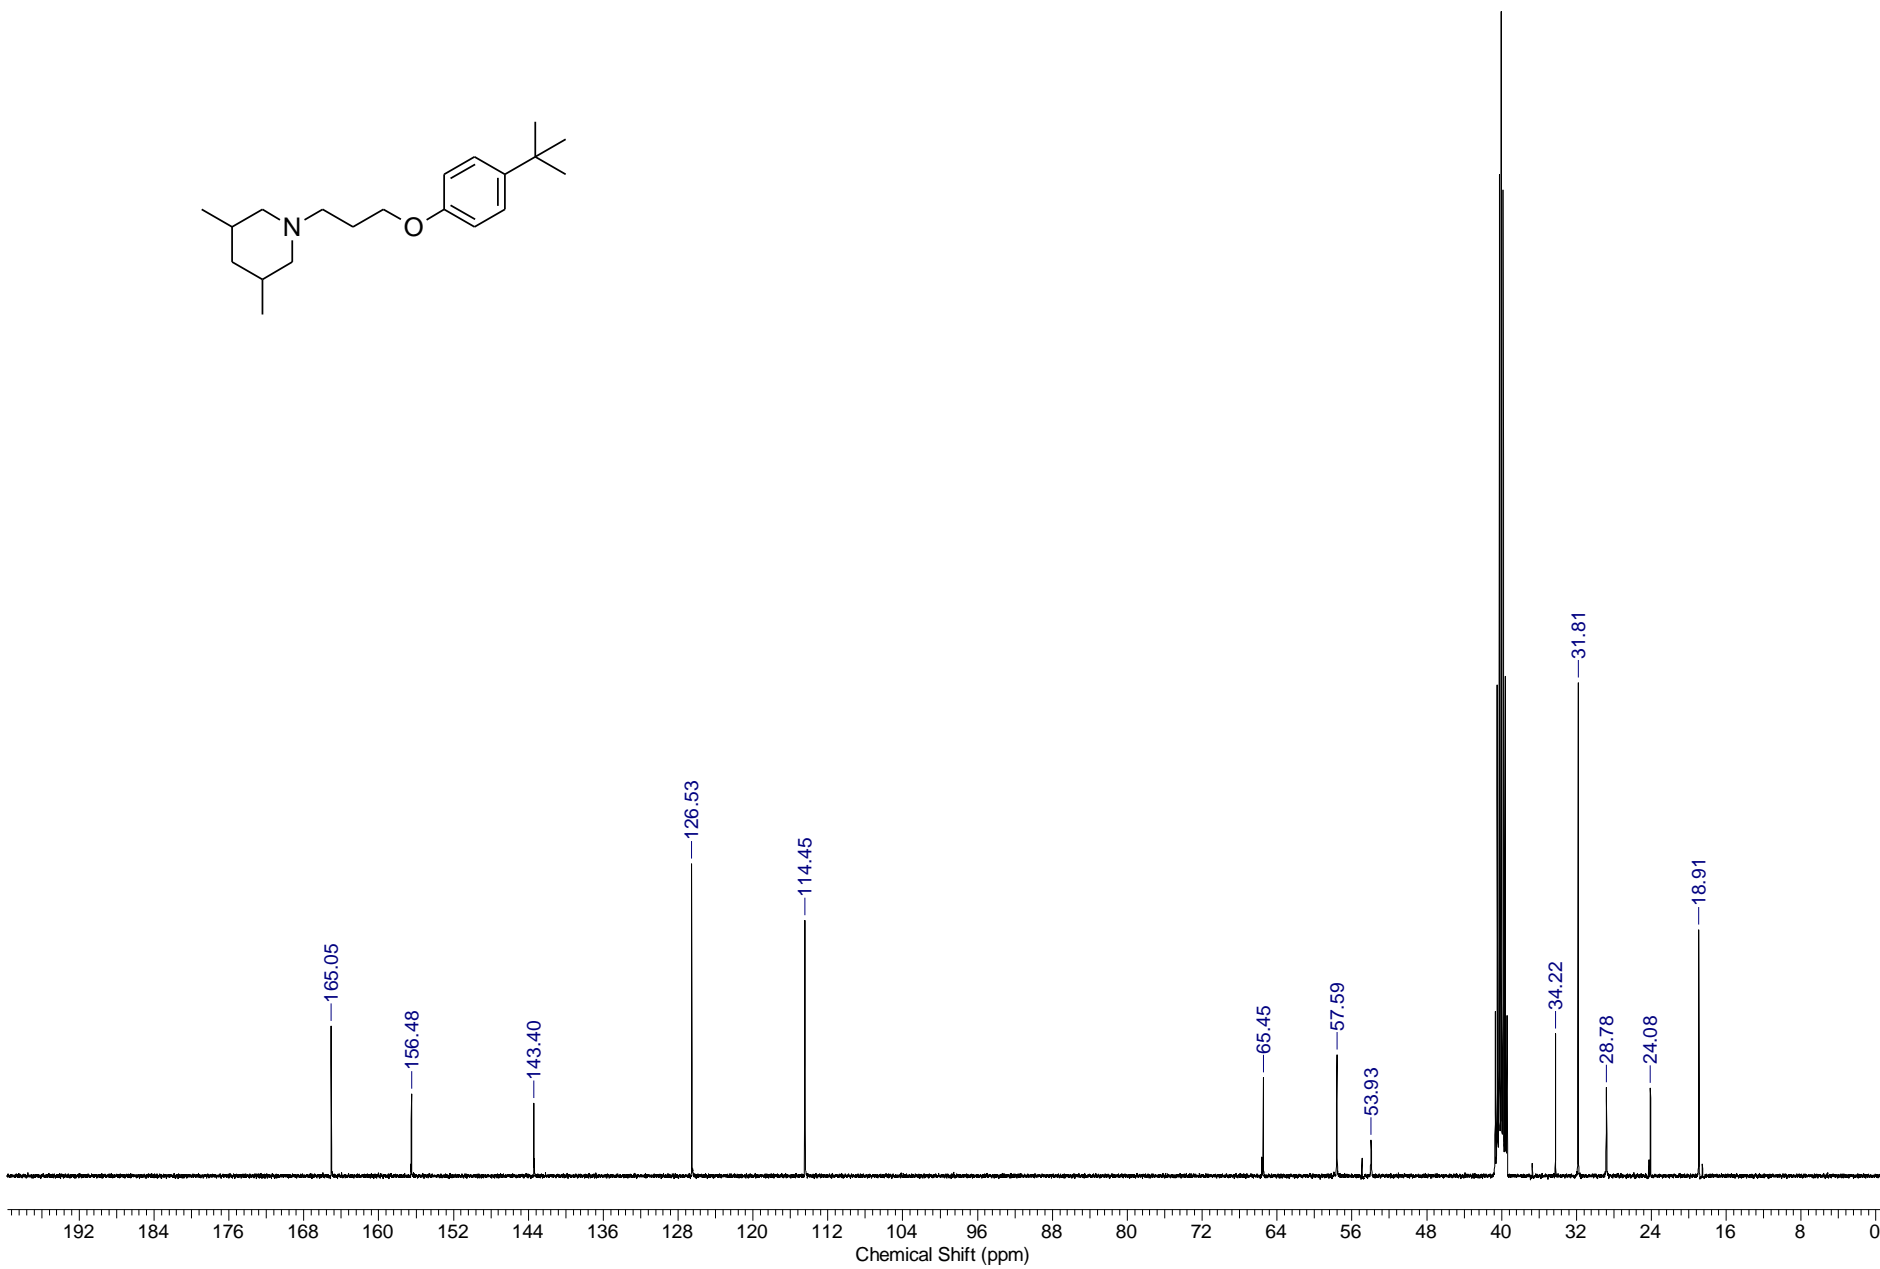

**Fig S32.** <sup>13</sup>C NMR spectrum of **20**

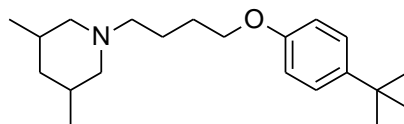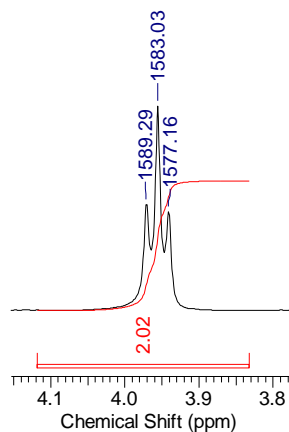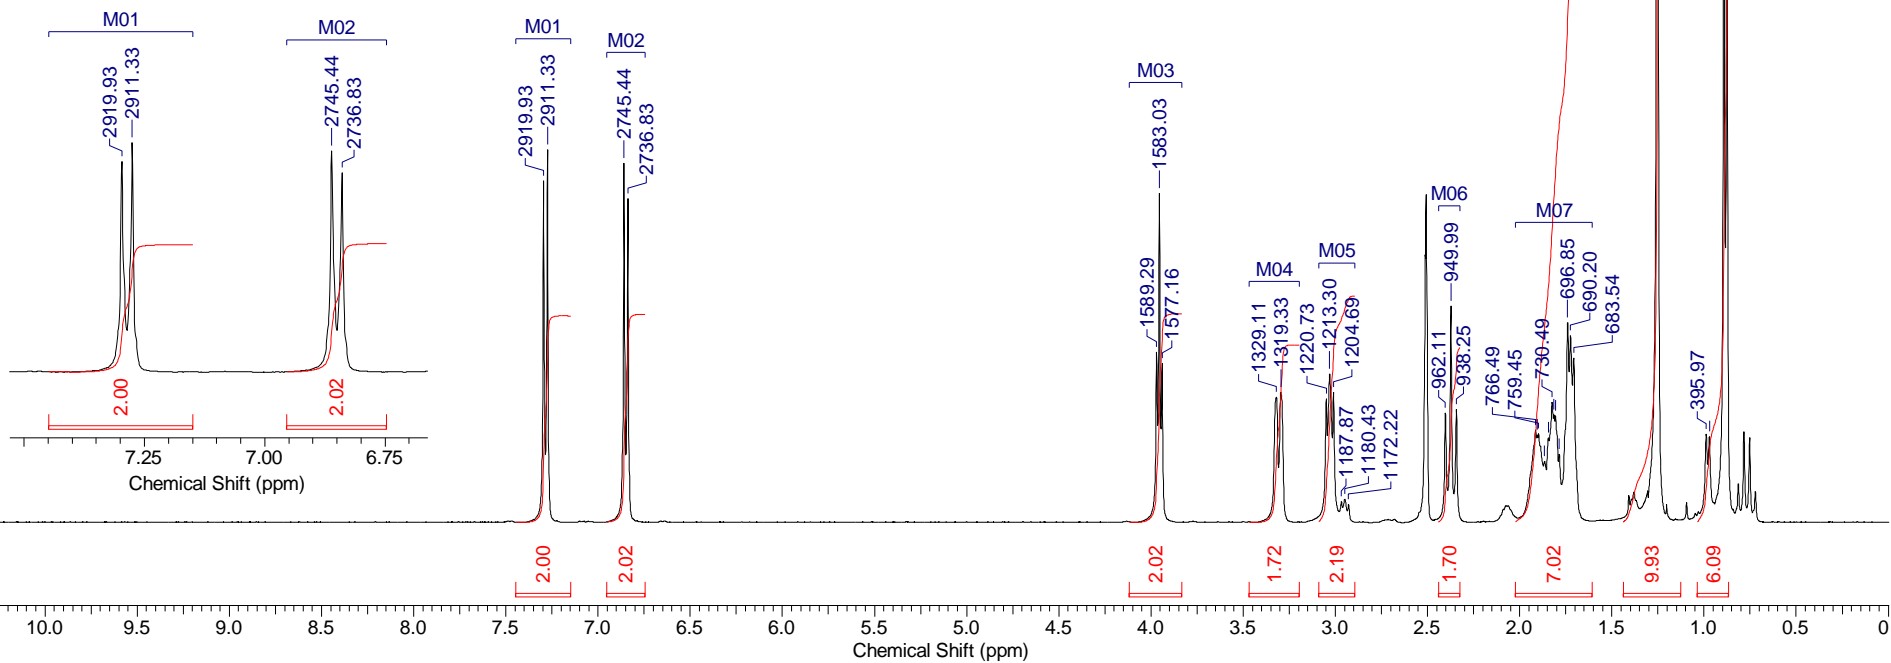

**Fig S33.**  $^1\text{H}$  NMR spectrum of **21**

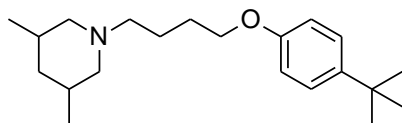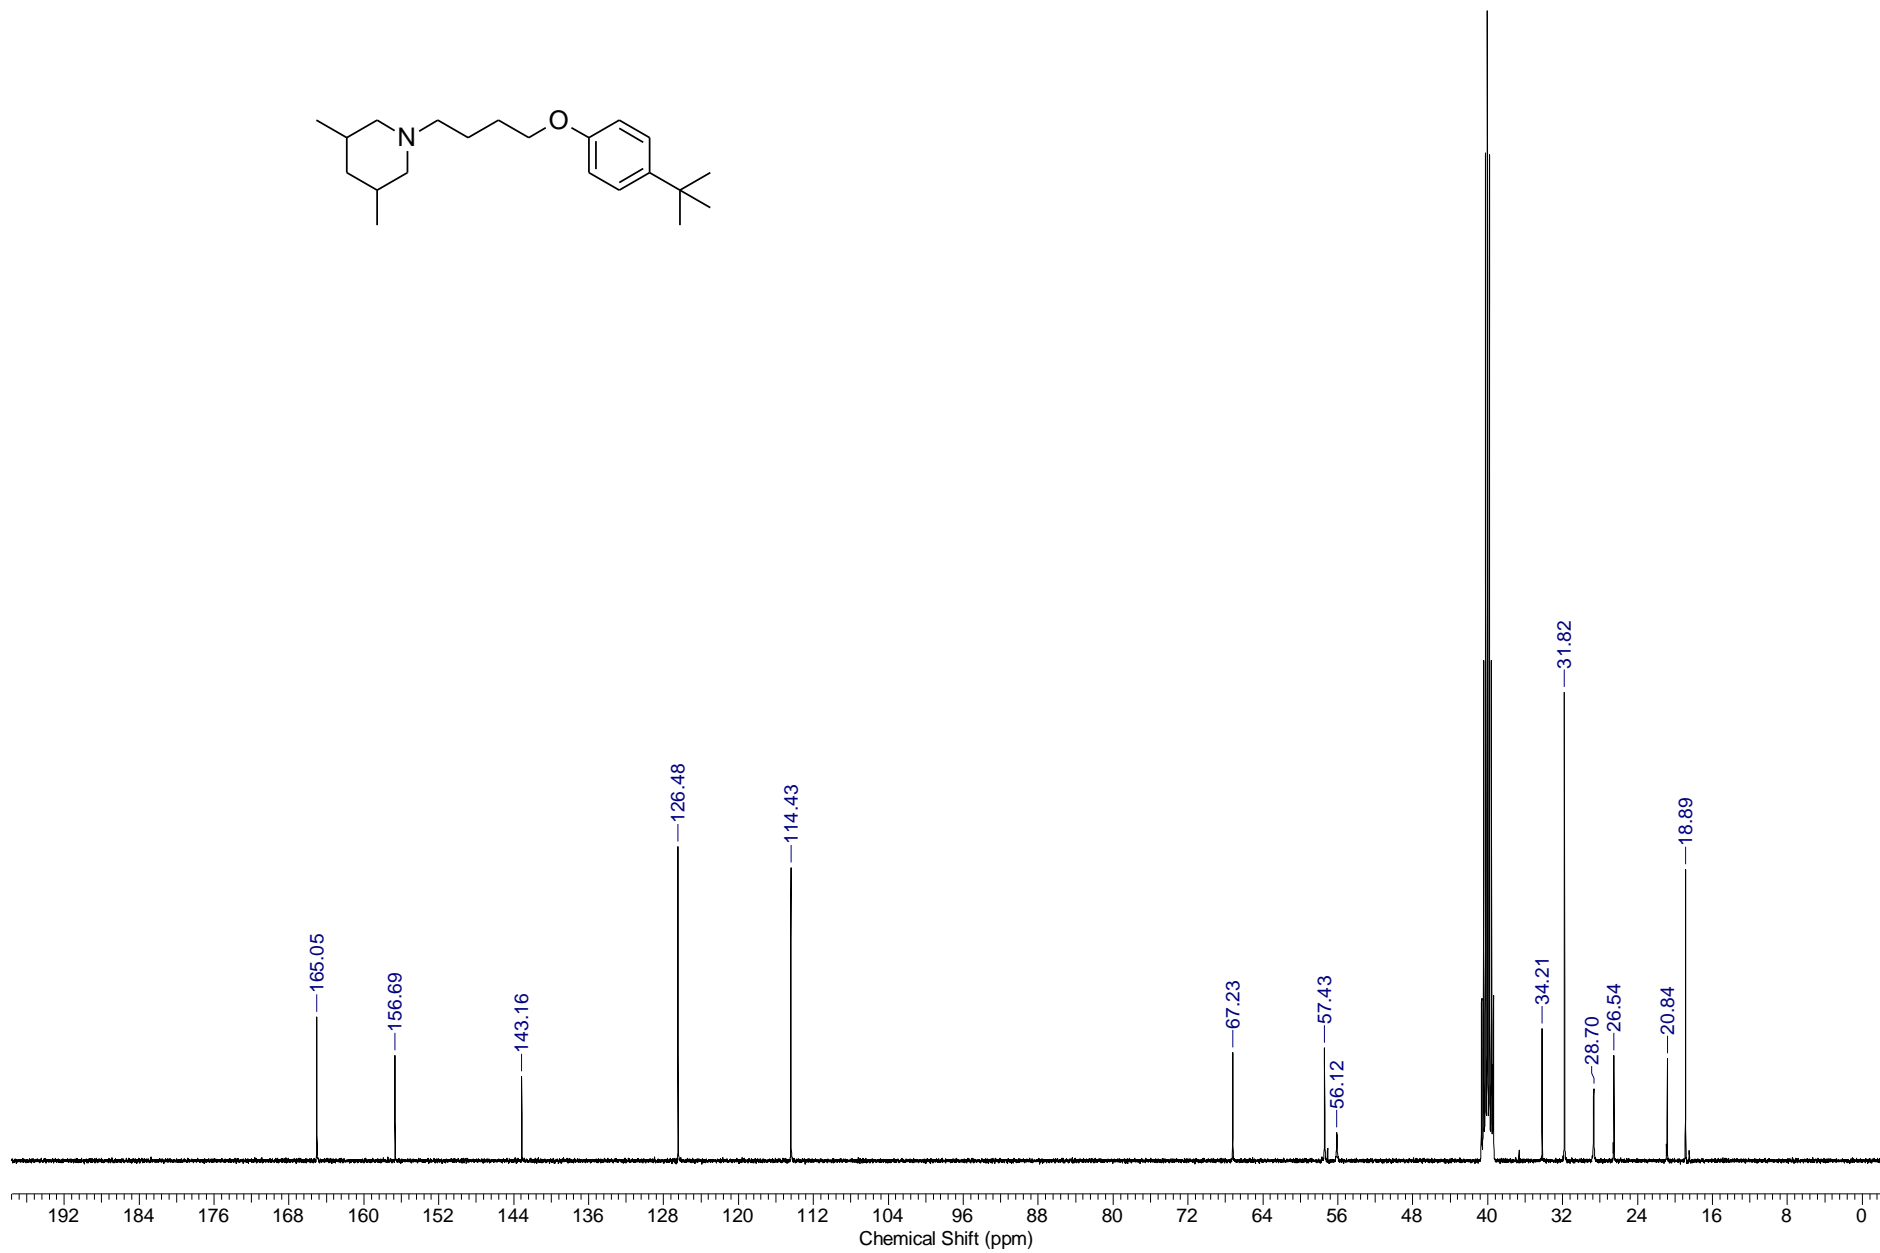

**Fig S34.** <sup>13</sup>C NMR spectrum of **21**

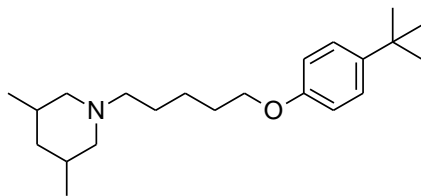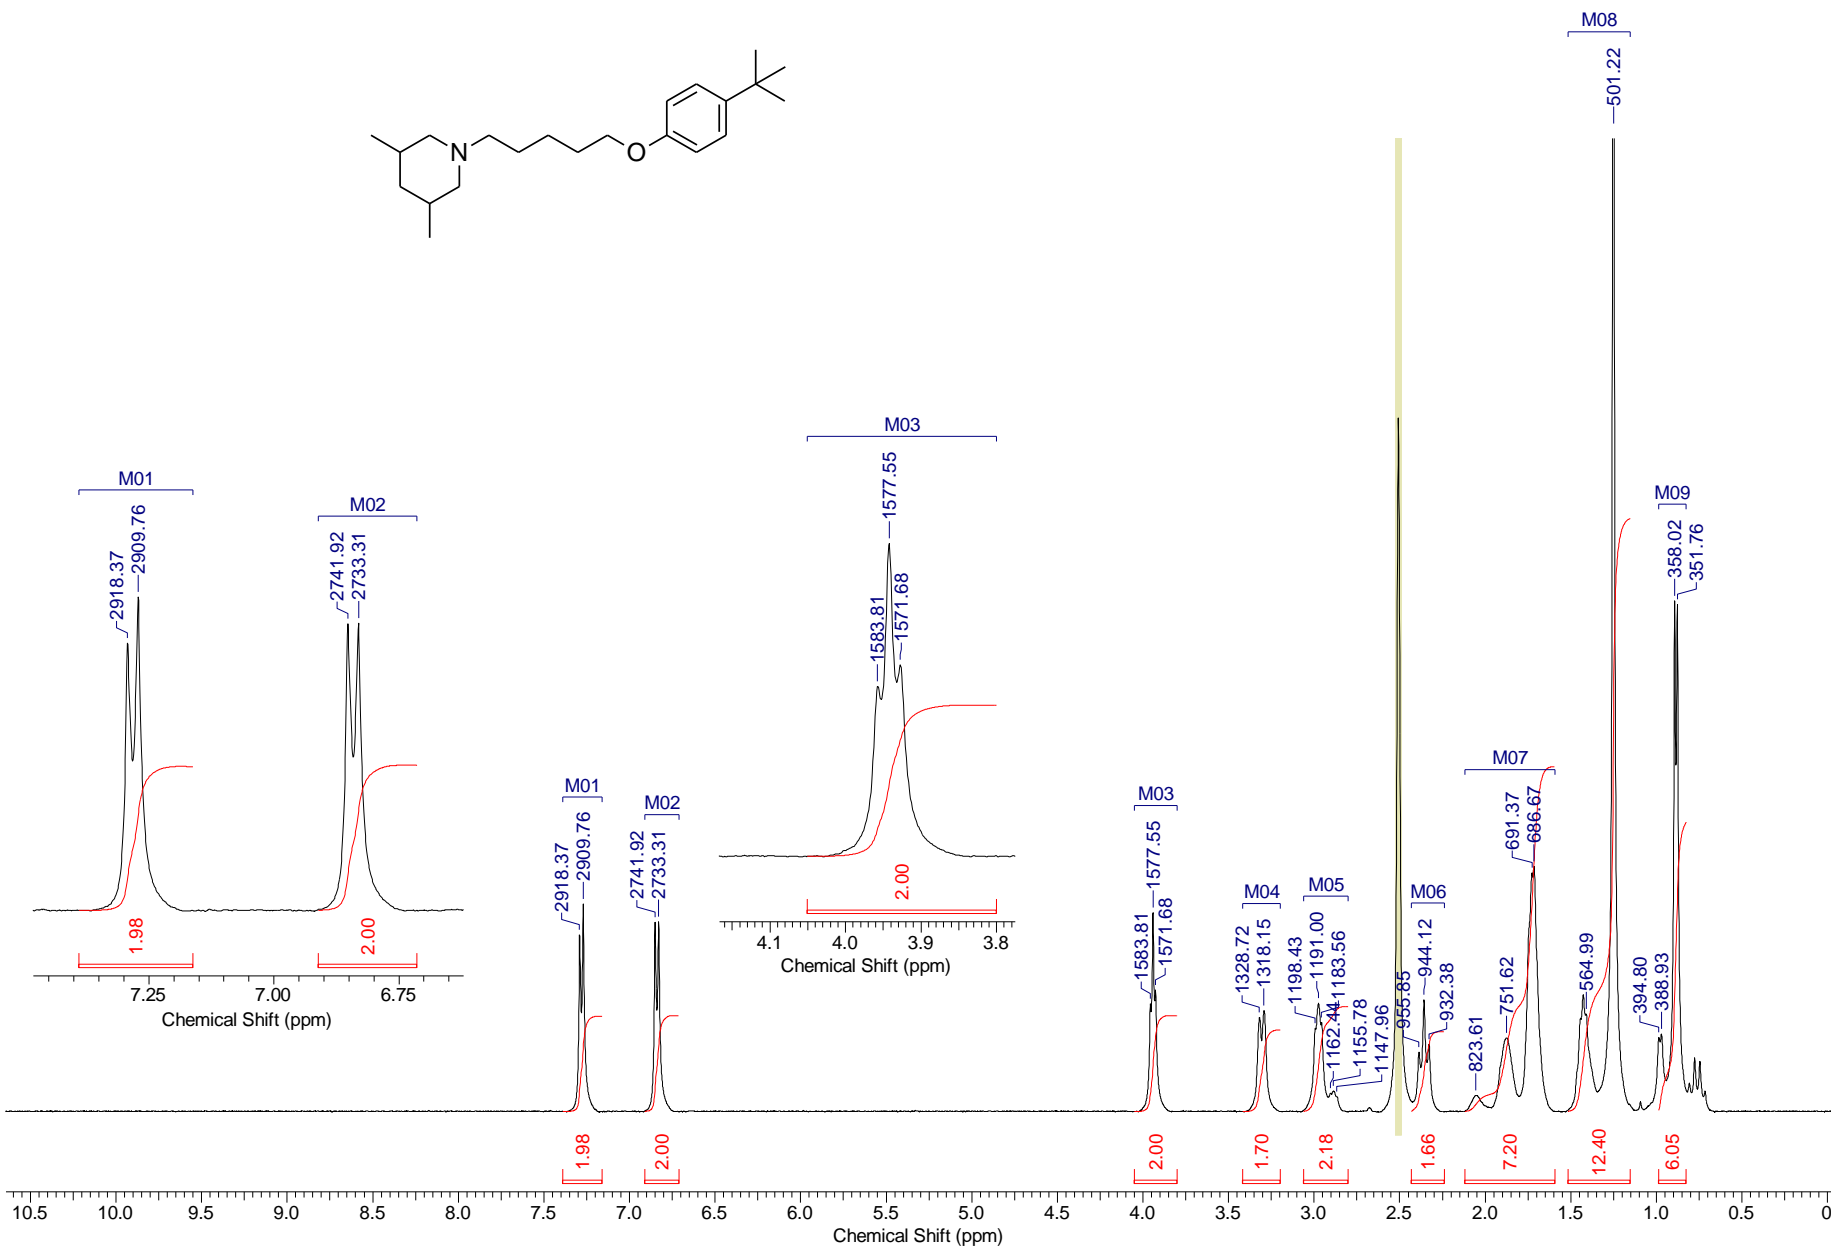

**Fig S35.**  $^1\text{H}$  NMR spectrum of **22**

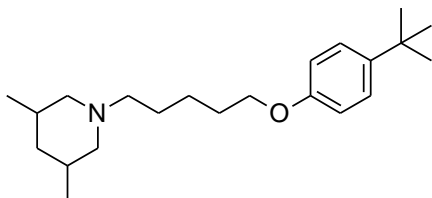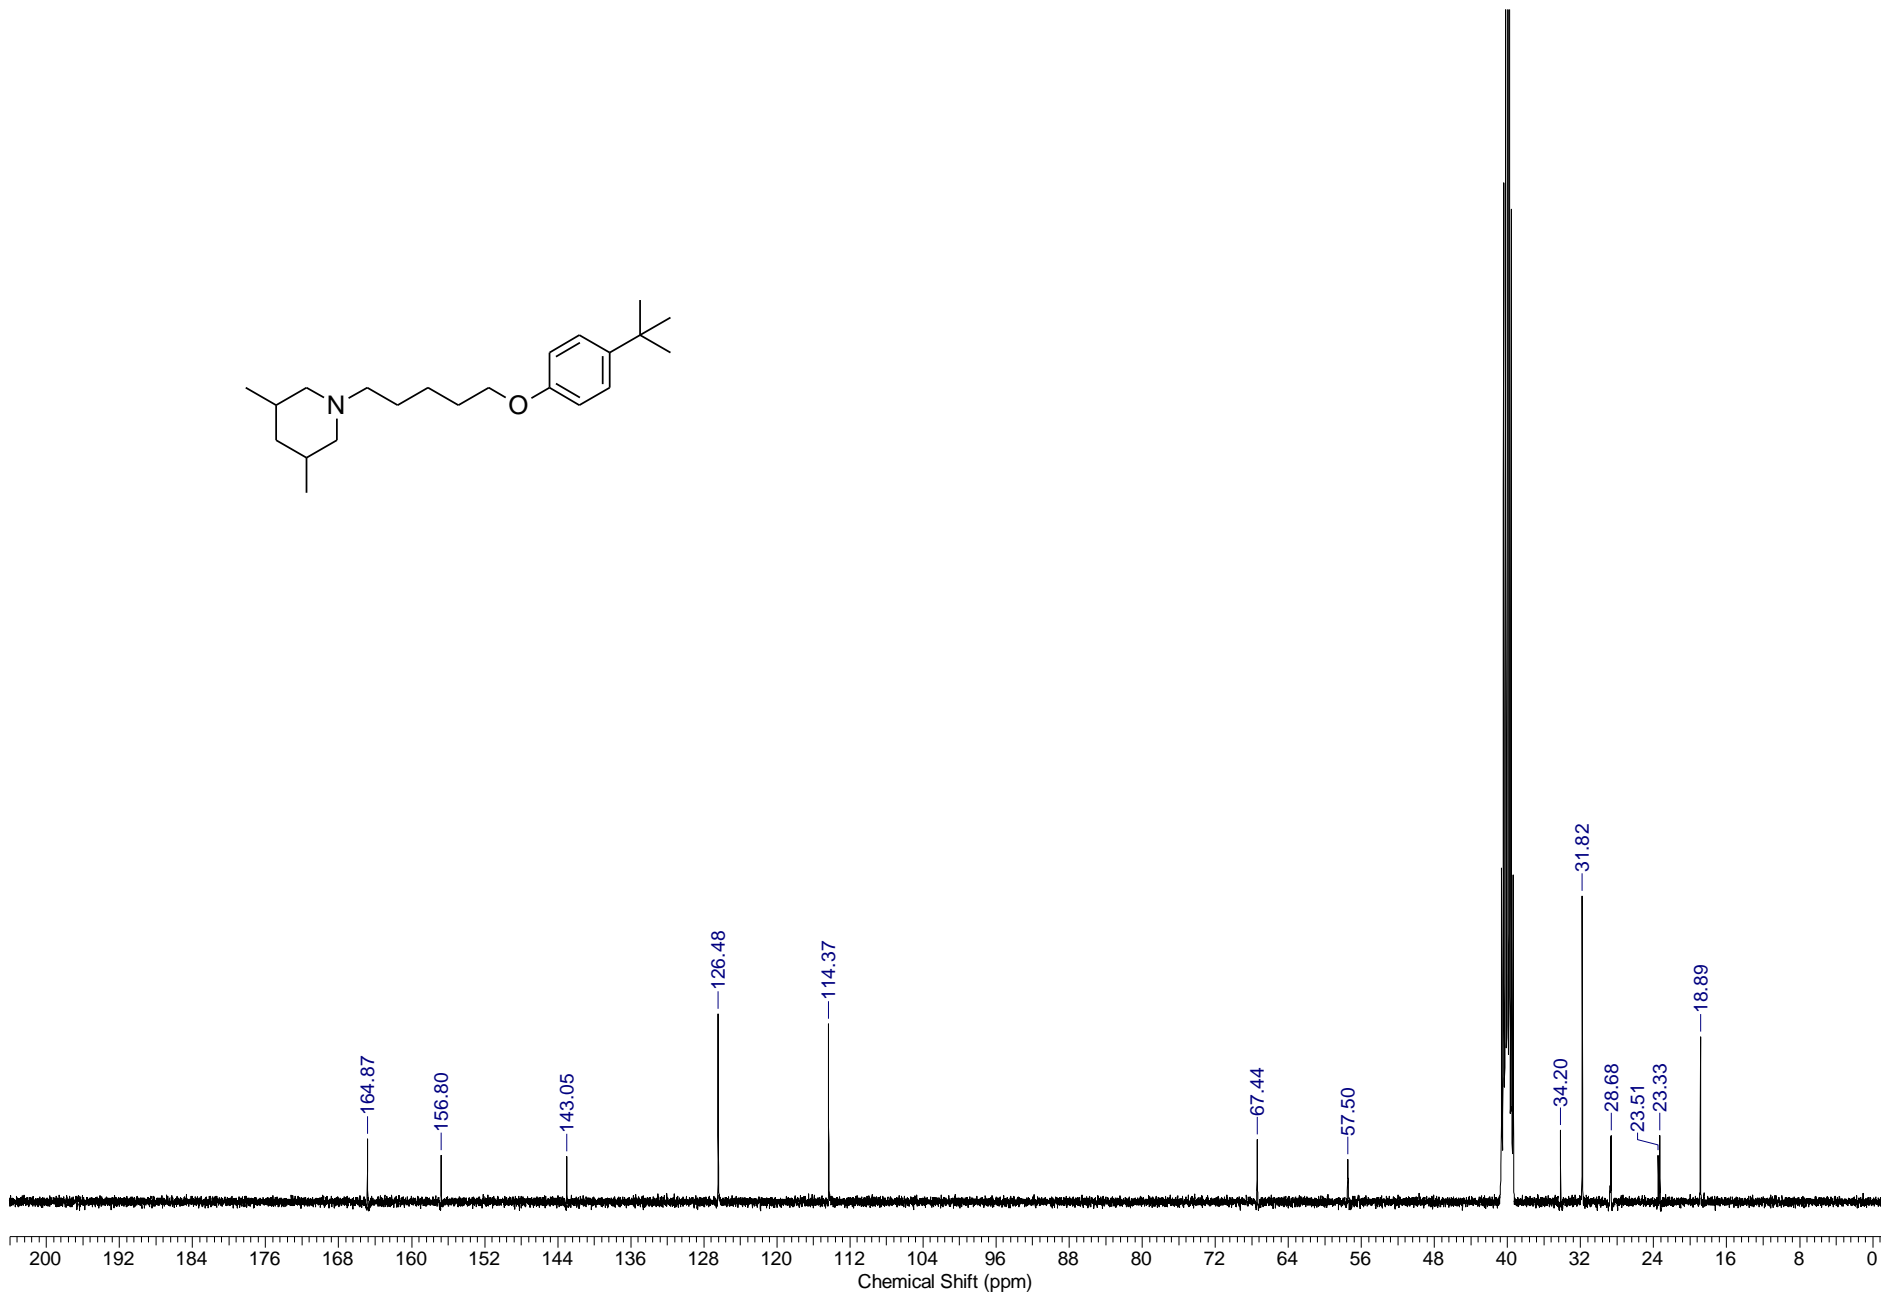

**Fig S36.** <sup>13</sup>C NMR spectrum of **22**

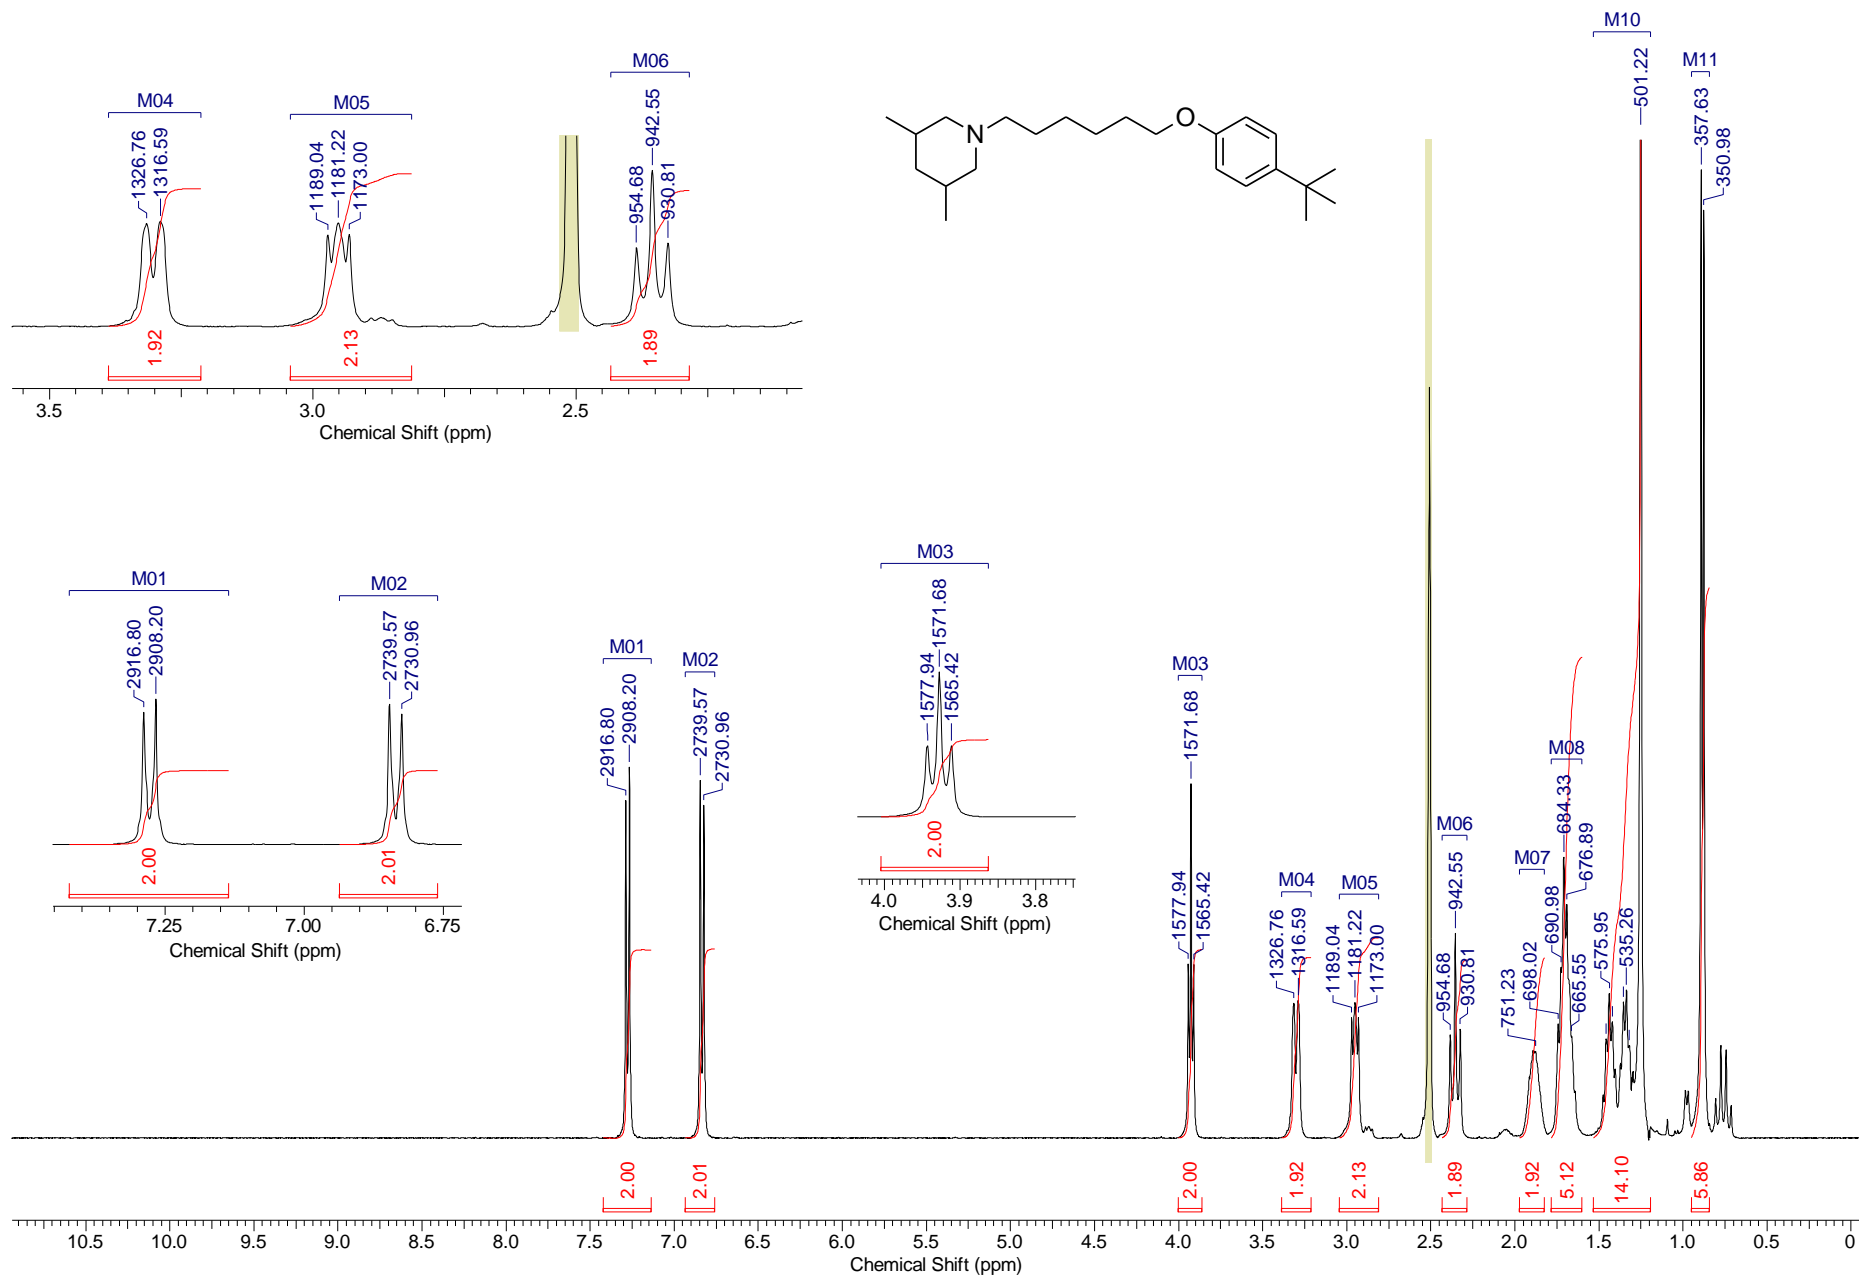

**Fig S37.**  $^1\text{H}$  NMR spectrum of **23**

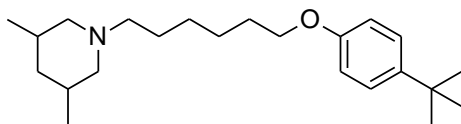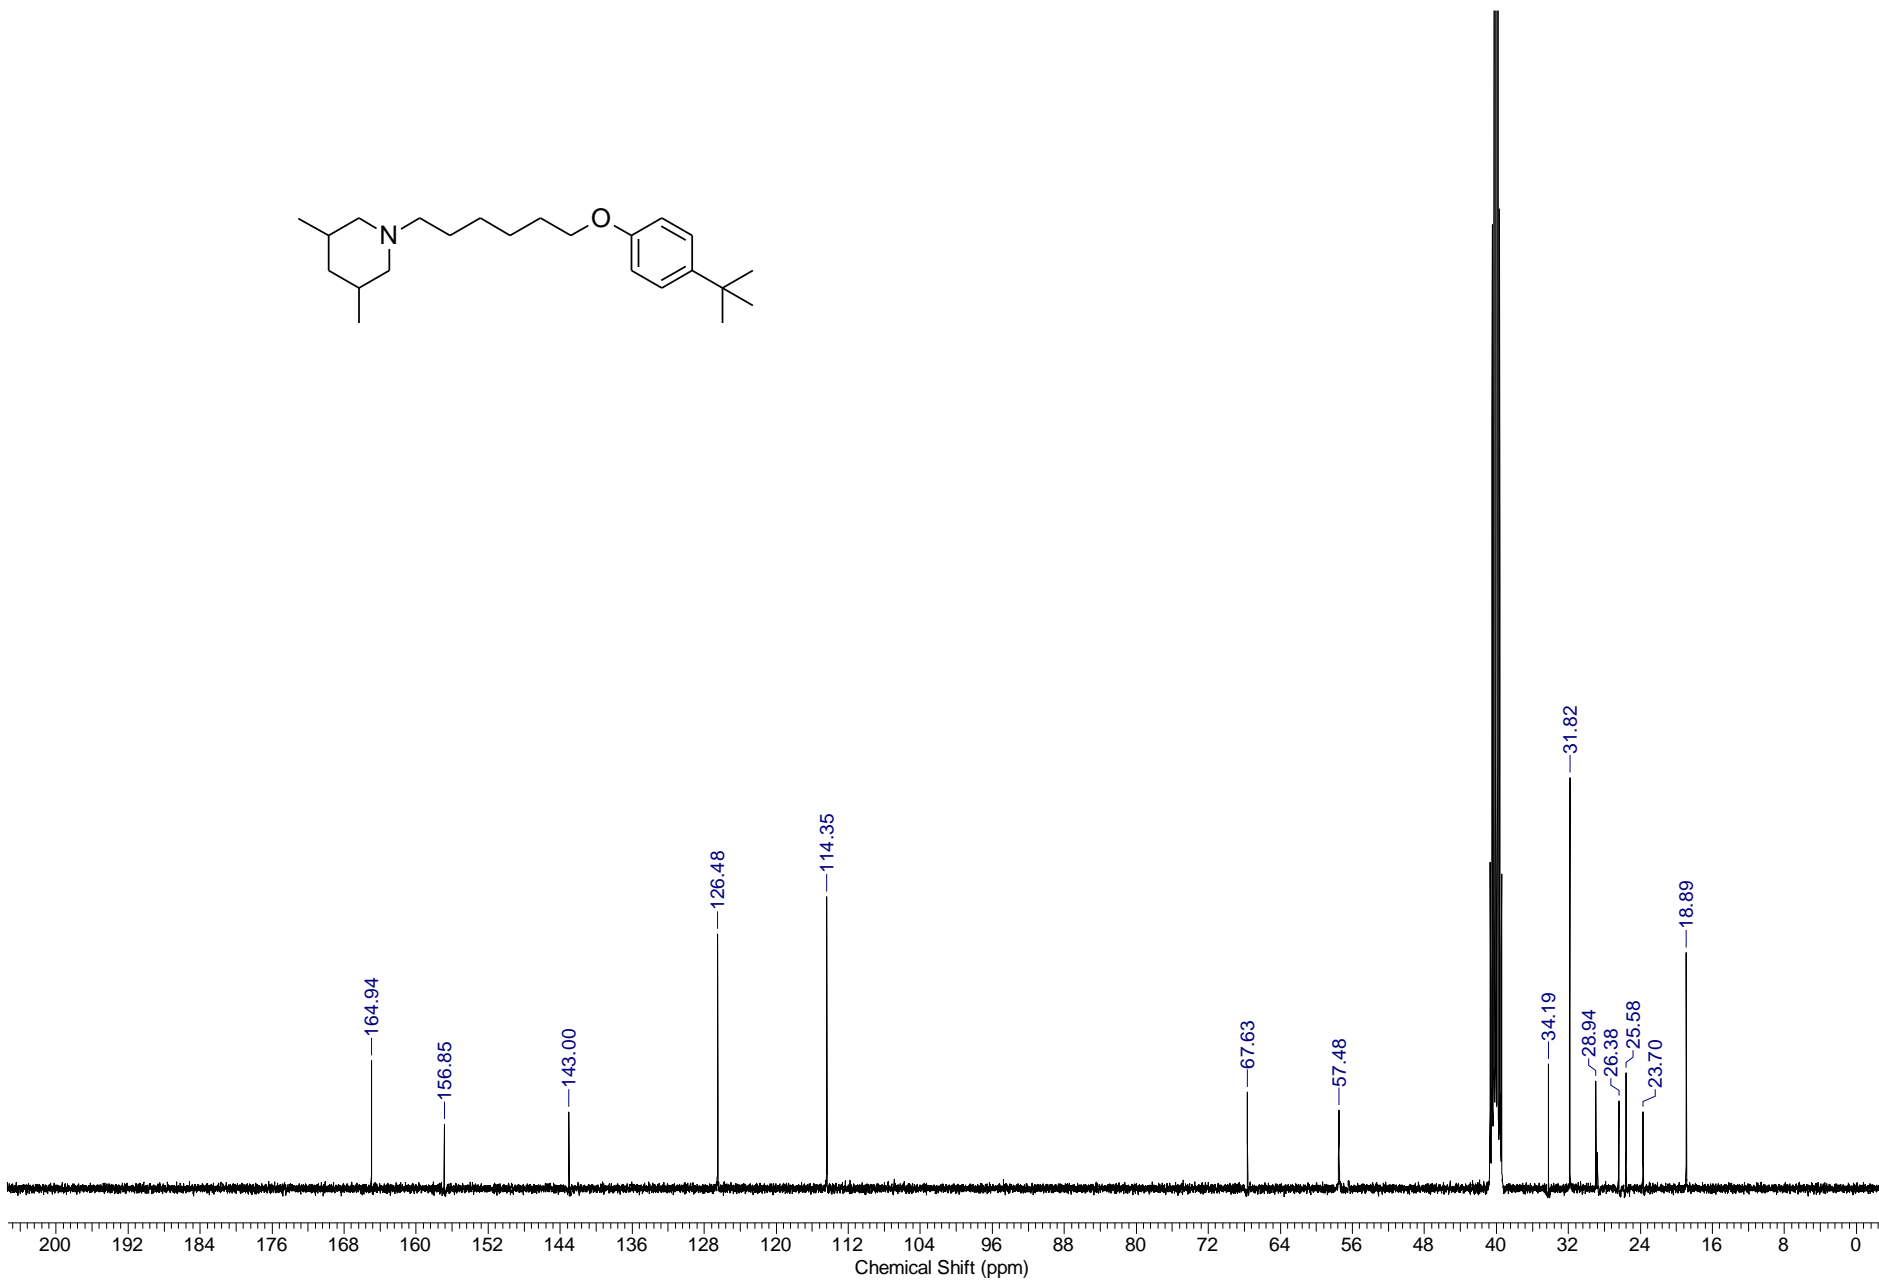

**Fig S38.** <sup>13</sup>C NMR spectrum of **23**

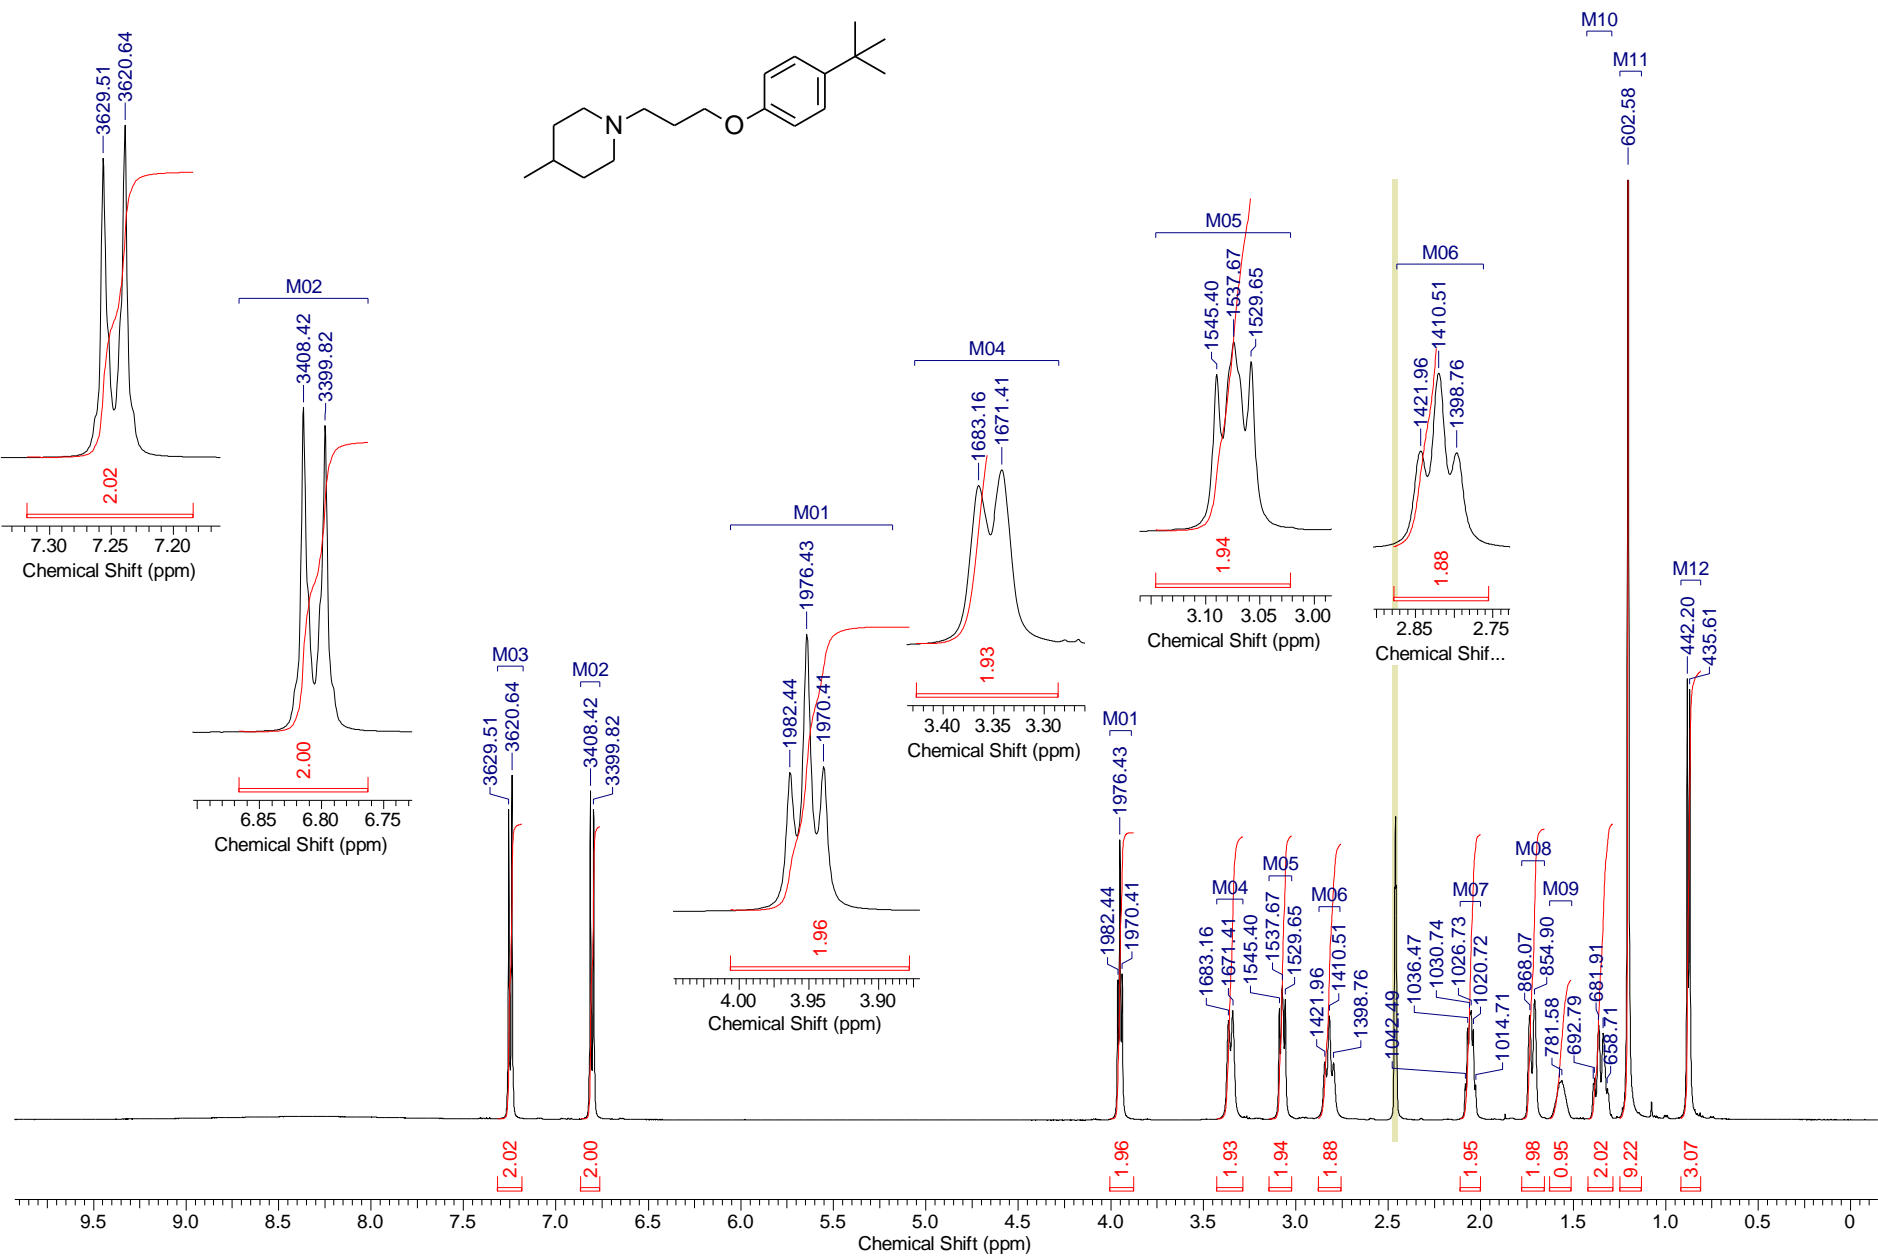

**Fig S39.** <sup>1</sup>H NMR spectrum of **24**



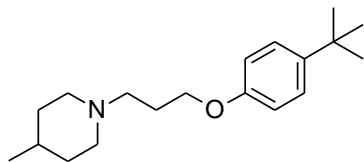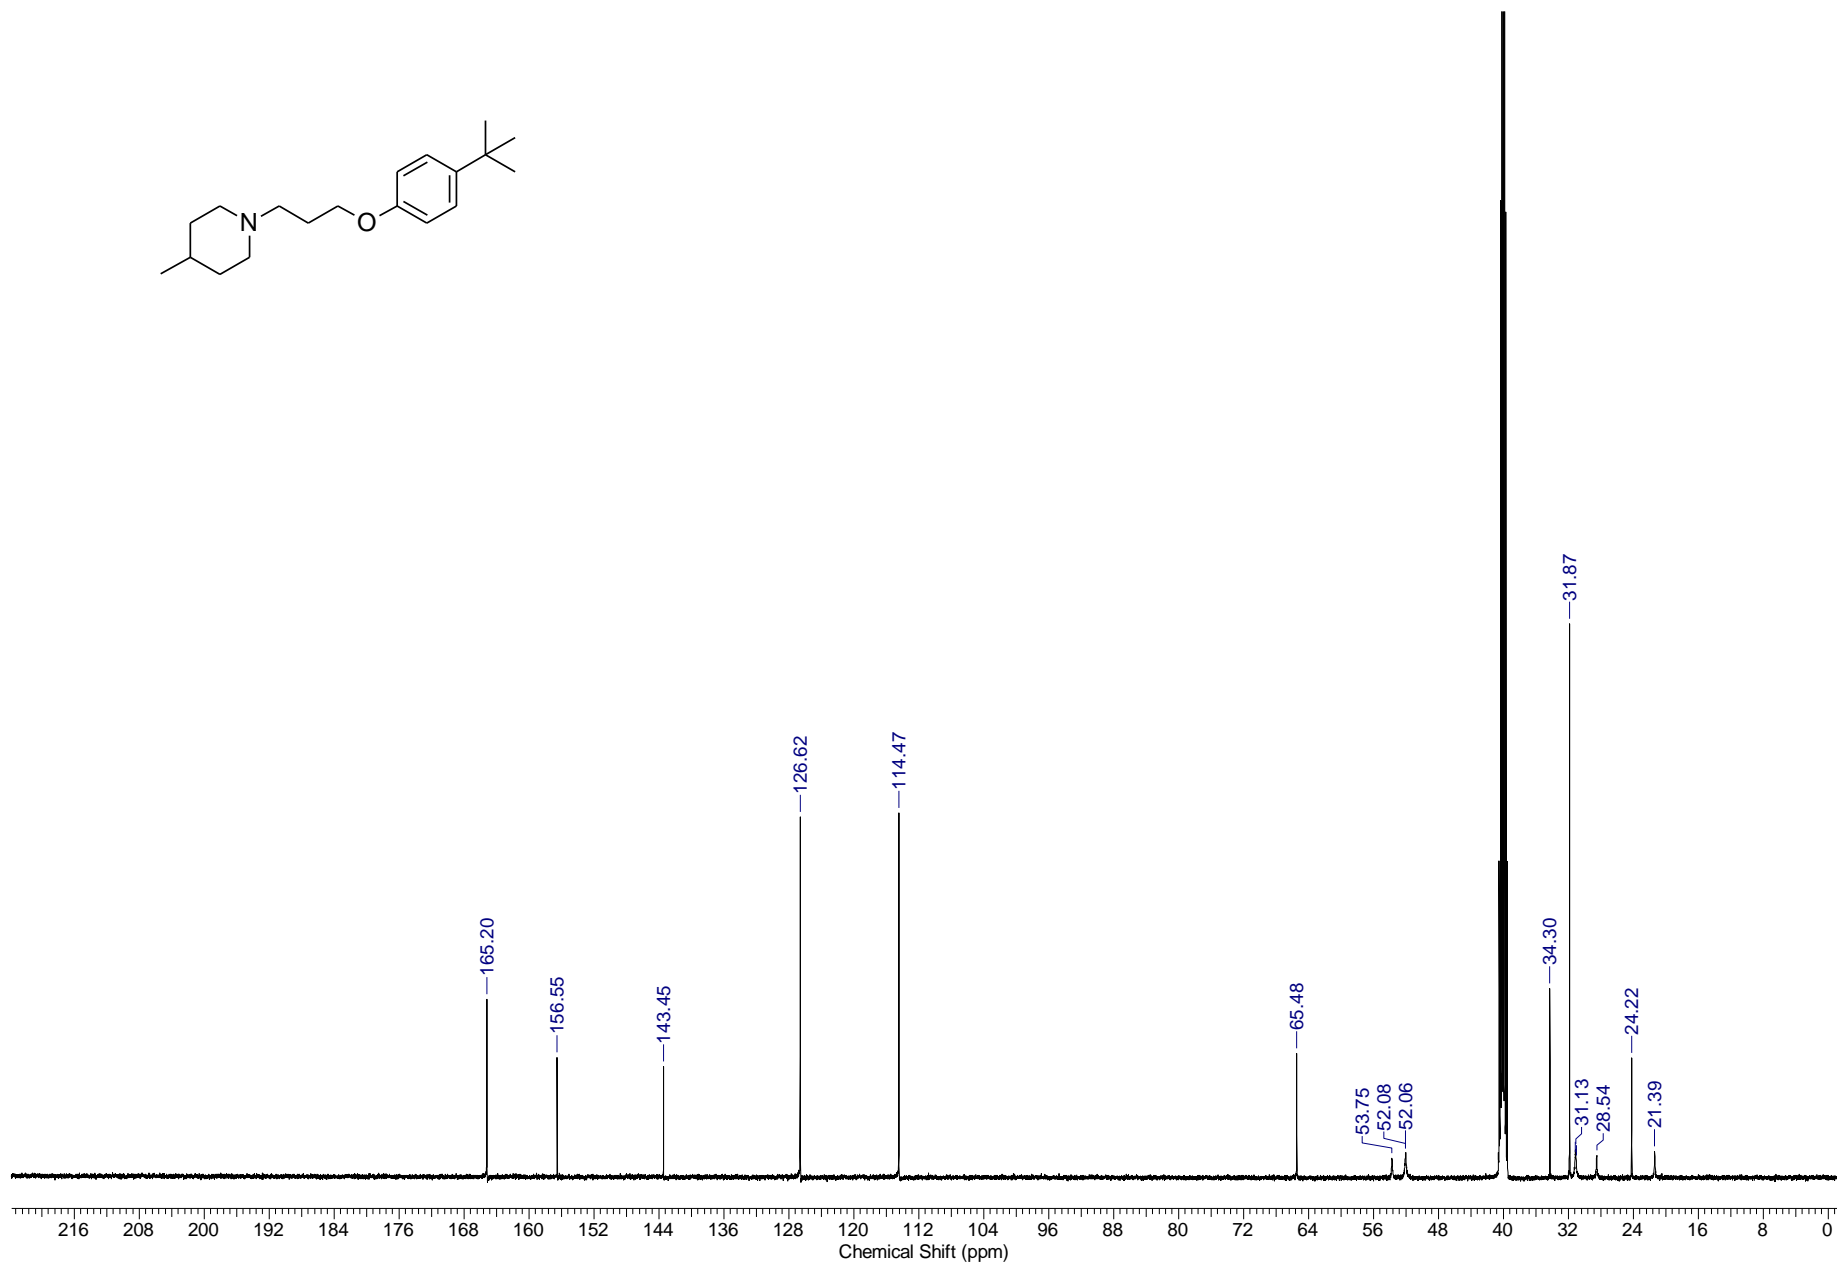

**Fig S40.** <sup>13</sup>C NMR spectrum of **24**

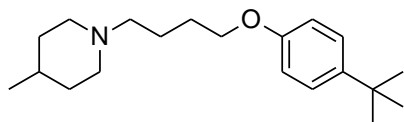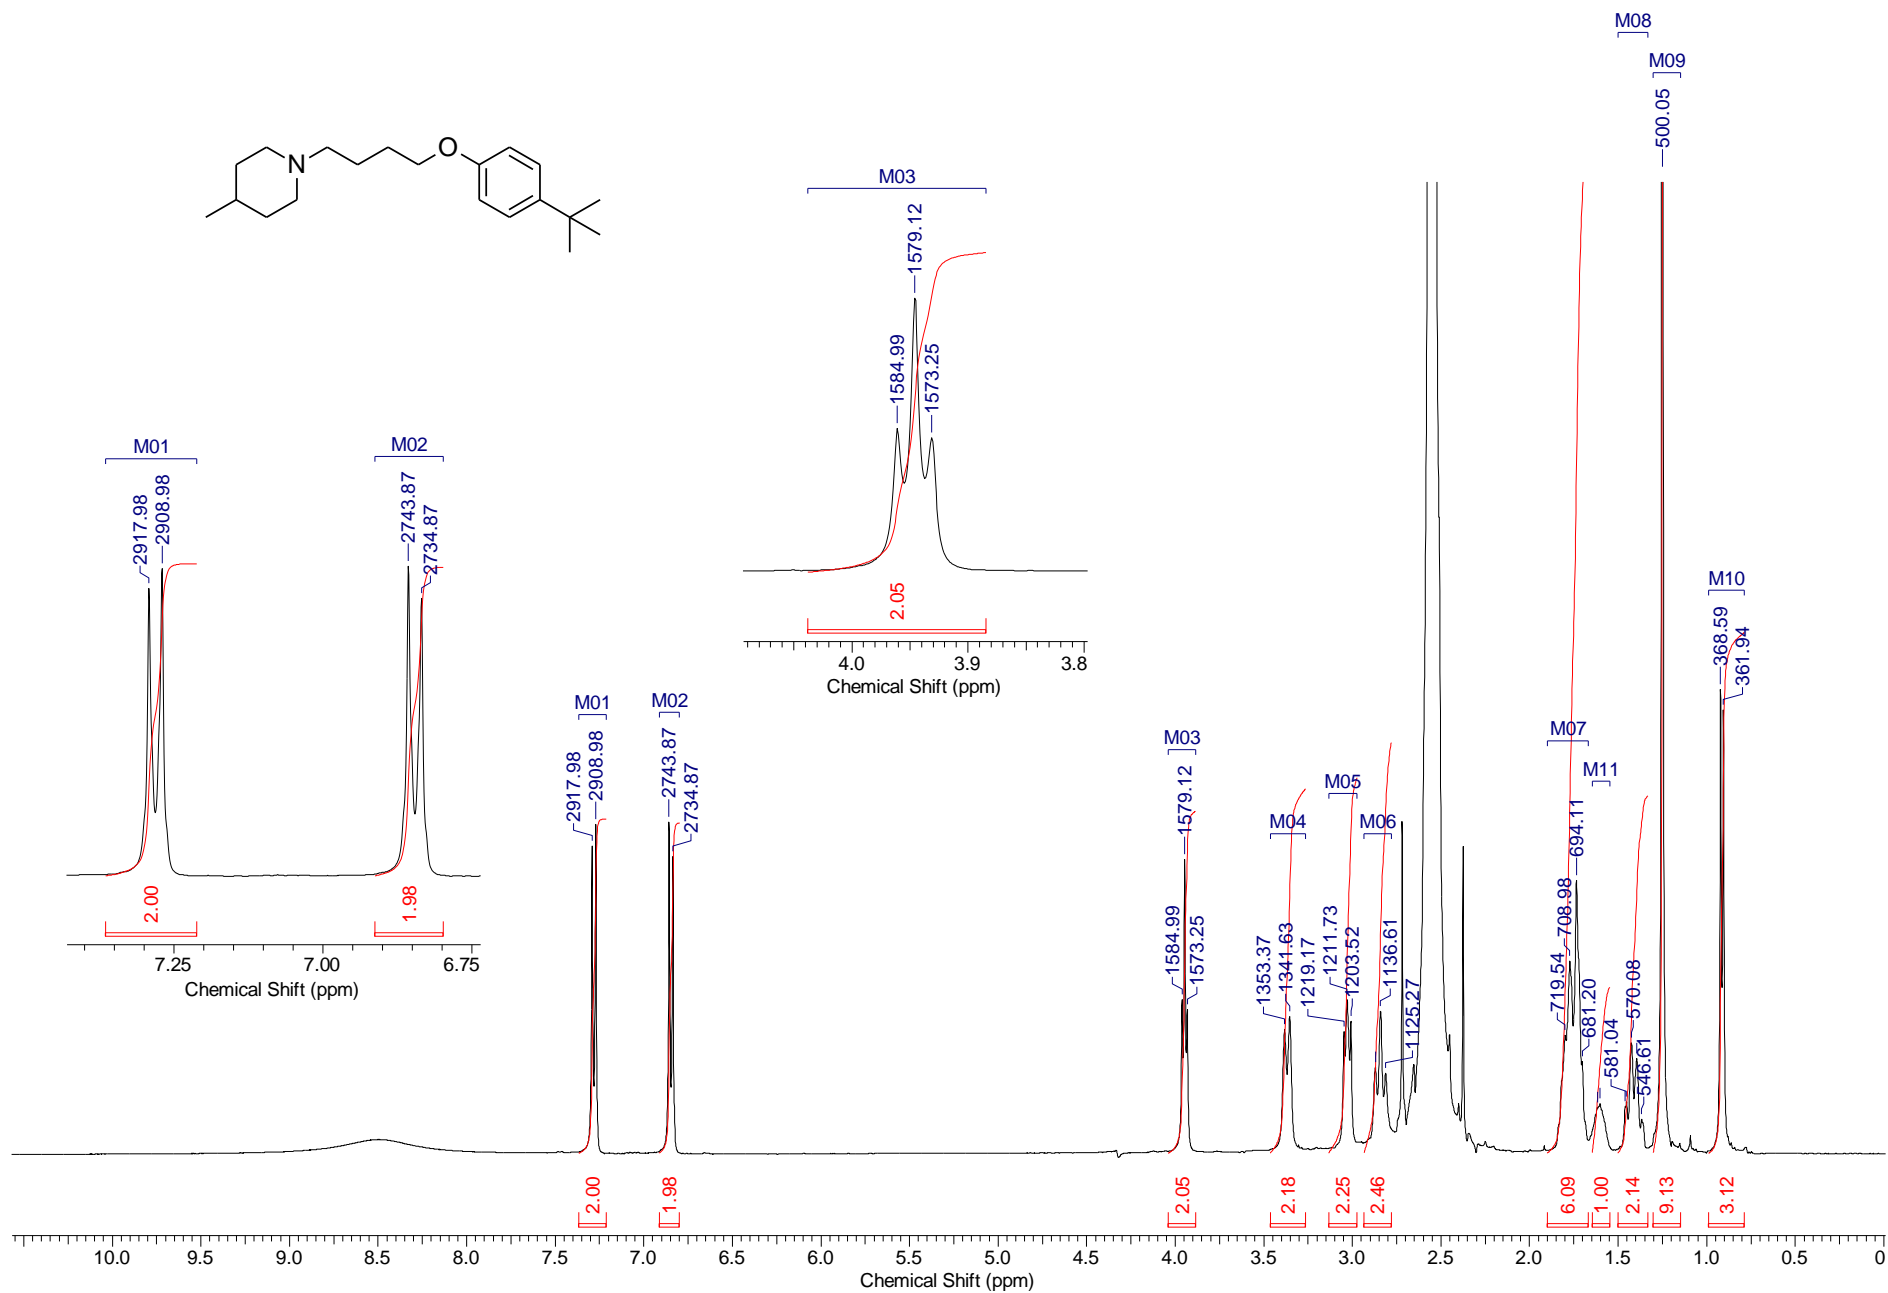

**Fig S41.**  $^1\text{H}$  NMR spectrum of **25**

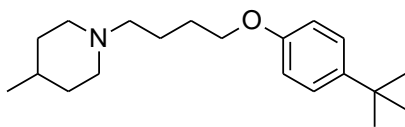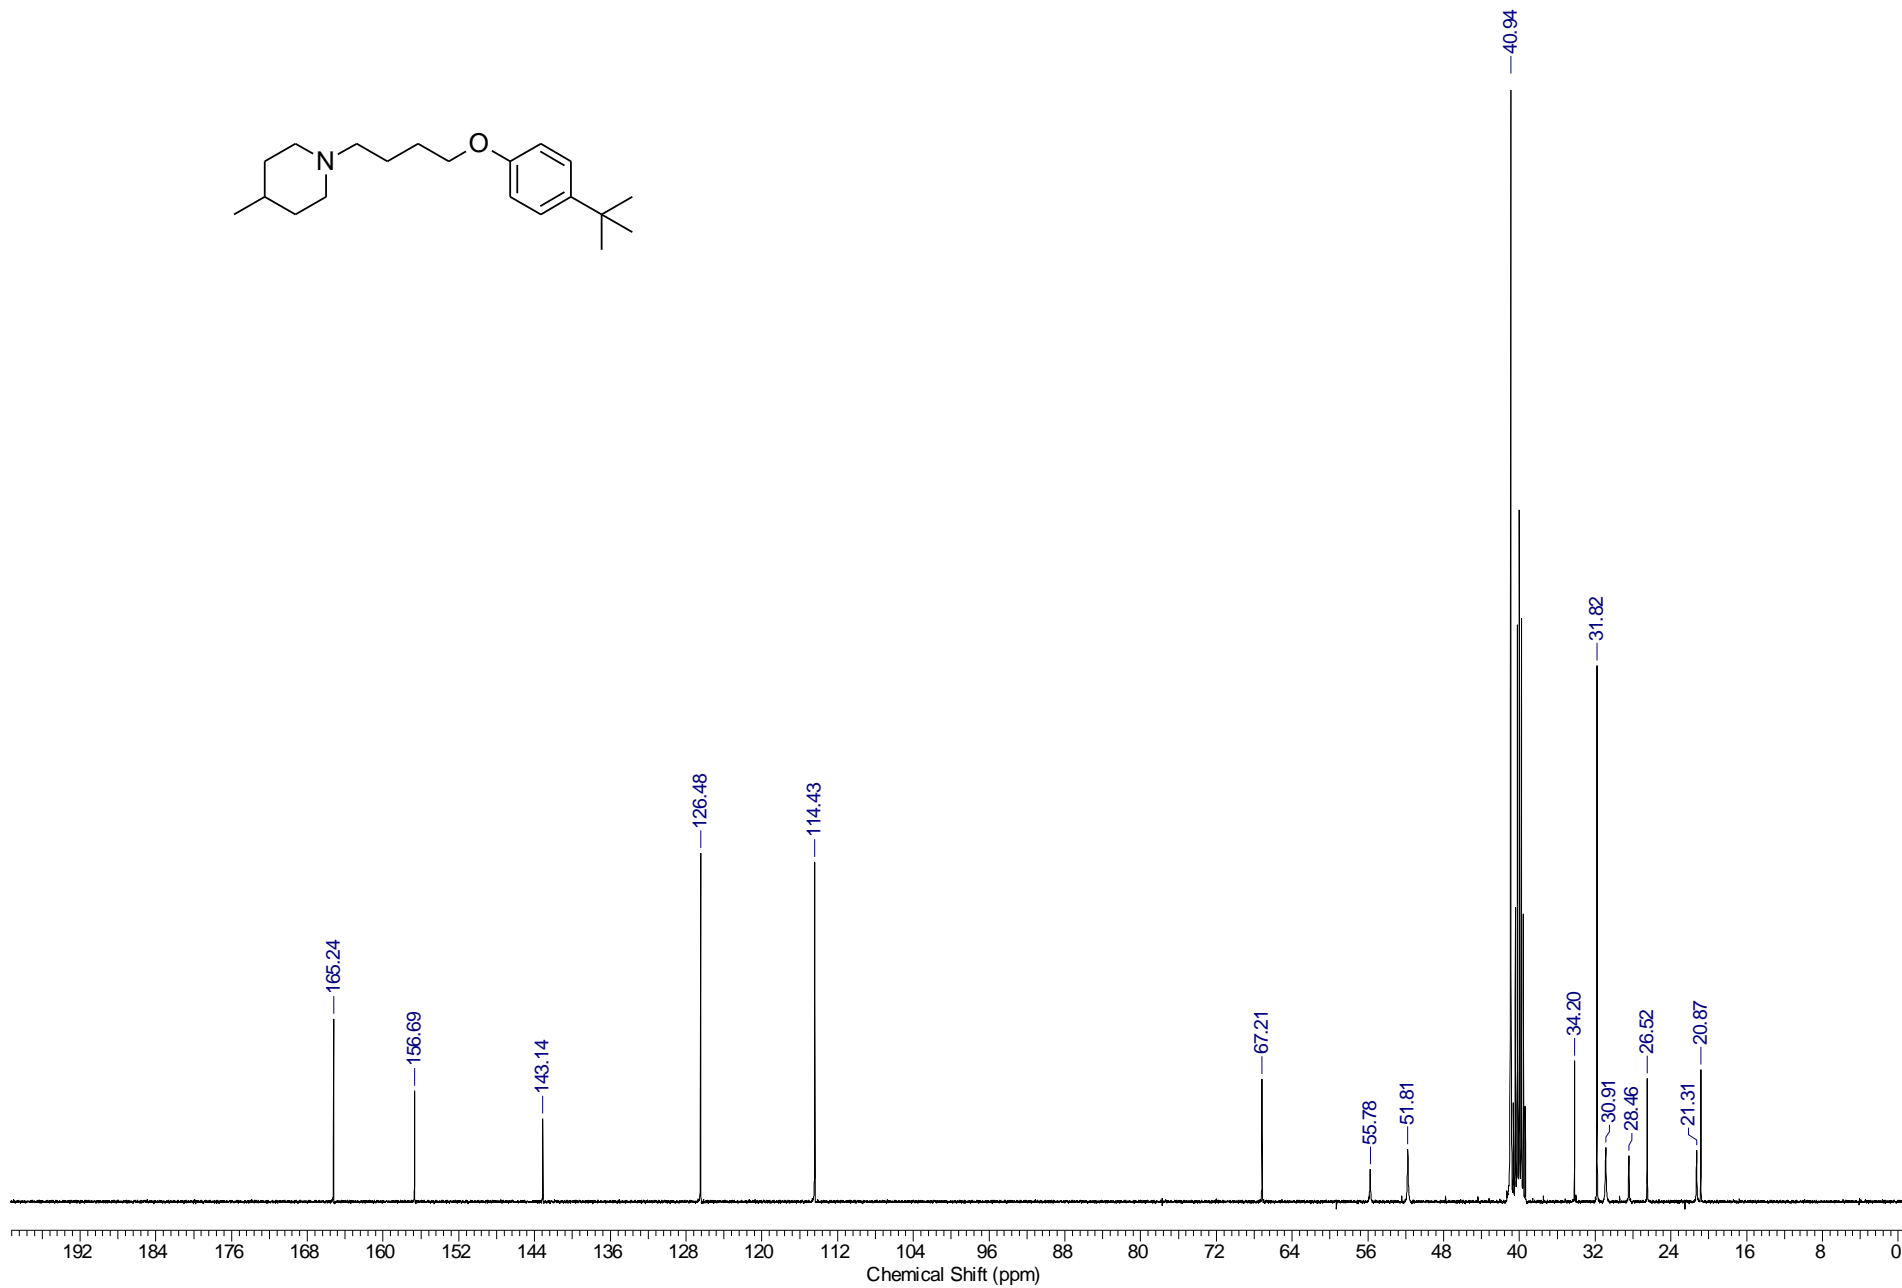

**Fig S42.** <sup>13</sup>C NMR spectrum of **25**

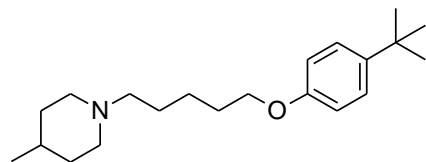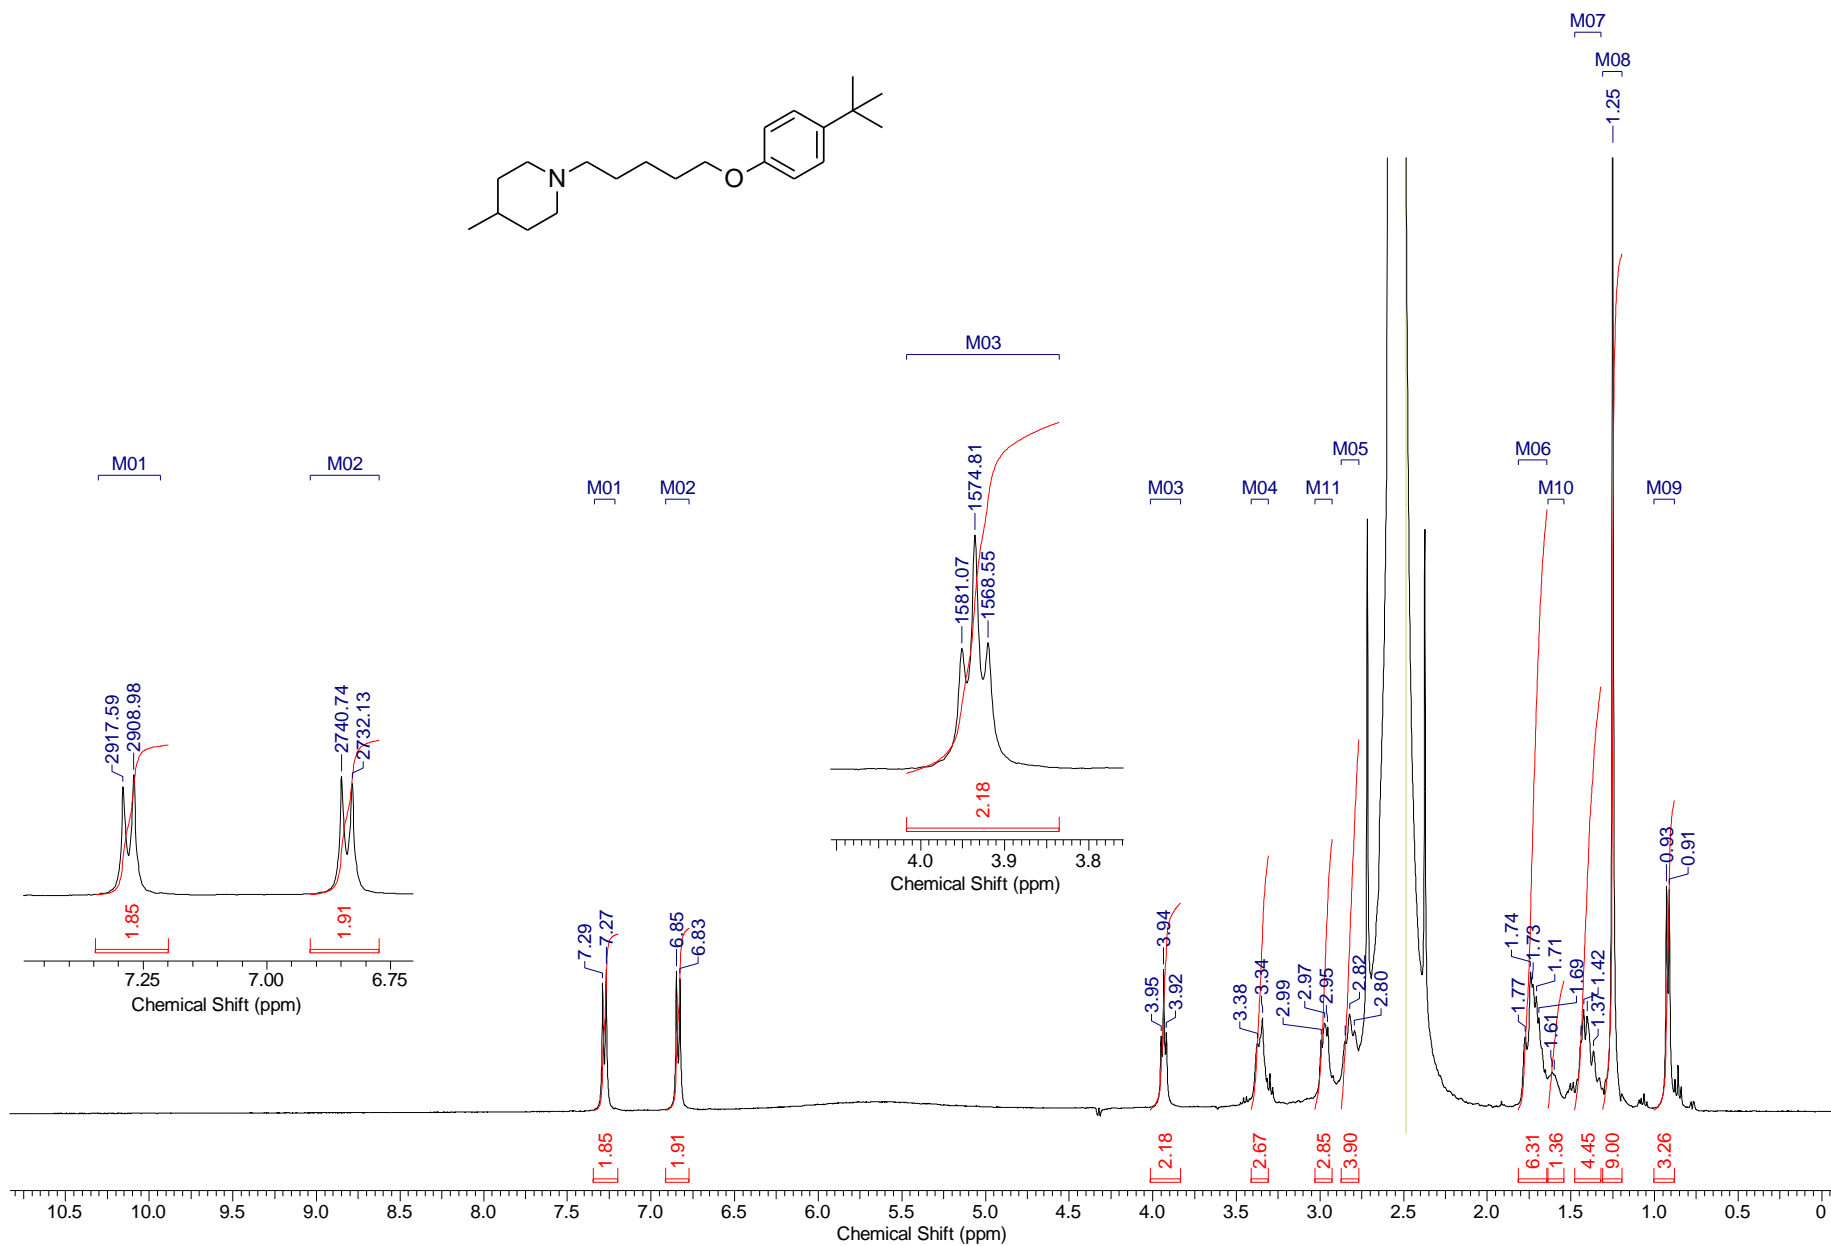

**Fig S43.**  $^1\text{H}$  NMR spectrum of **26**

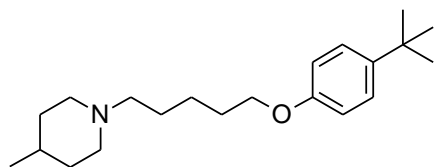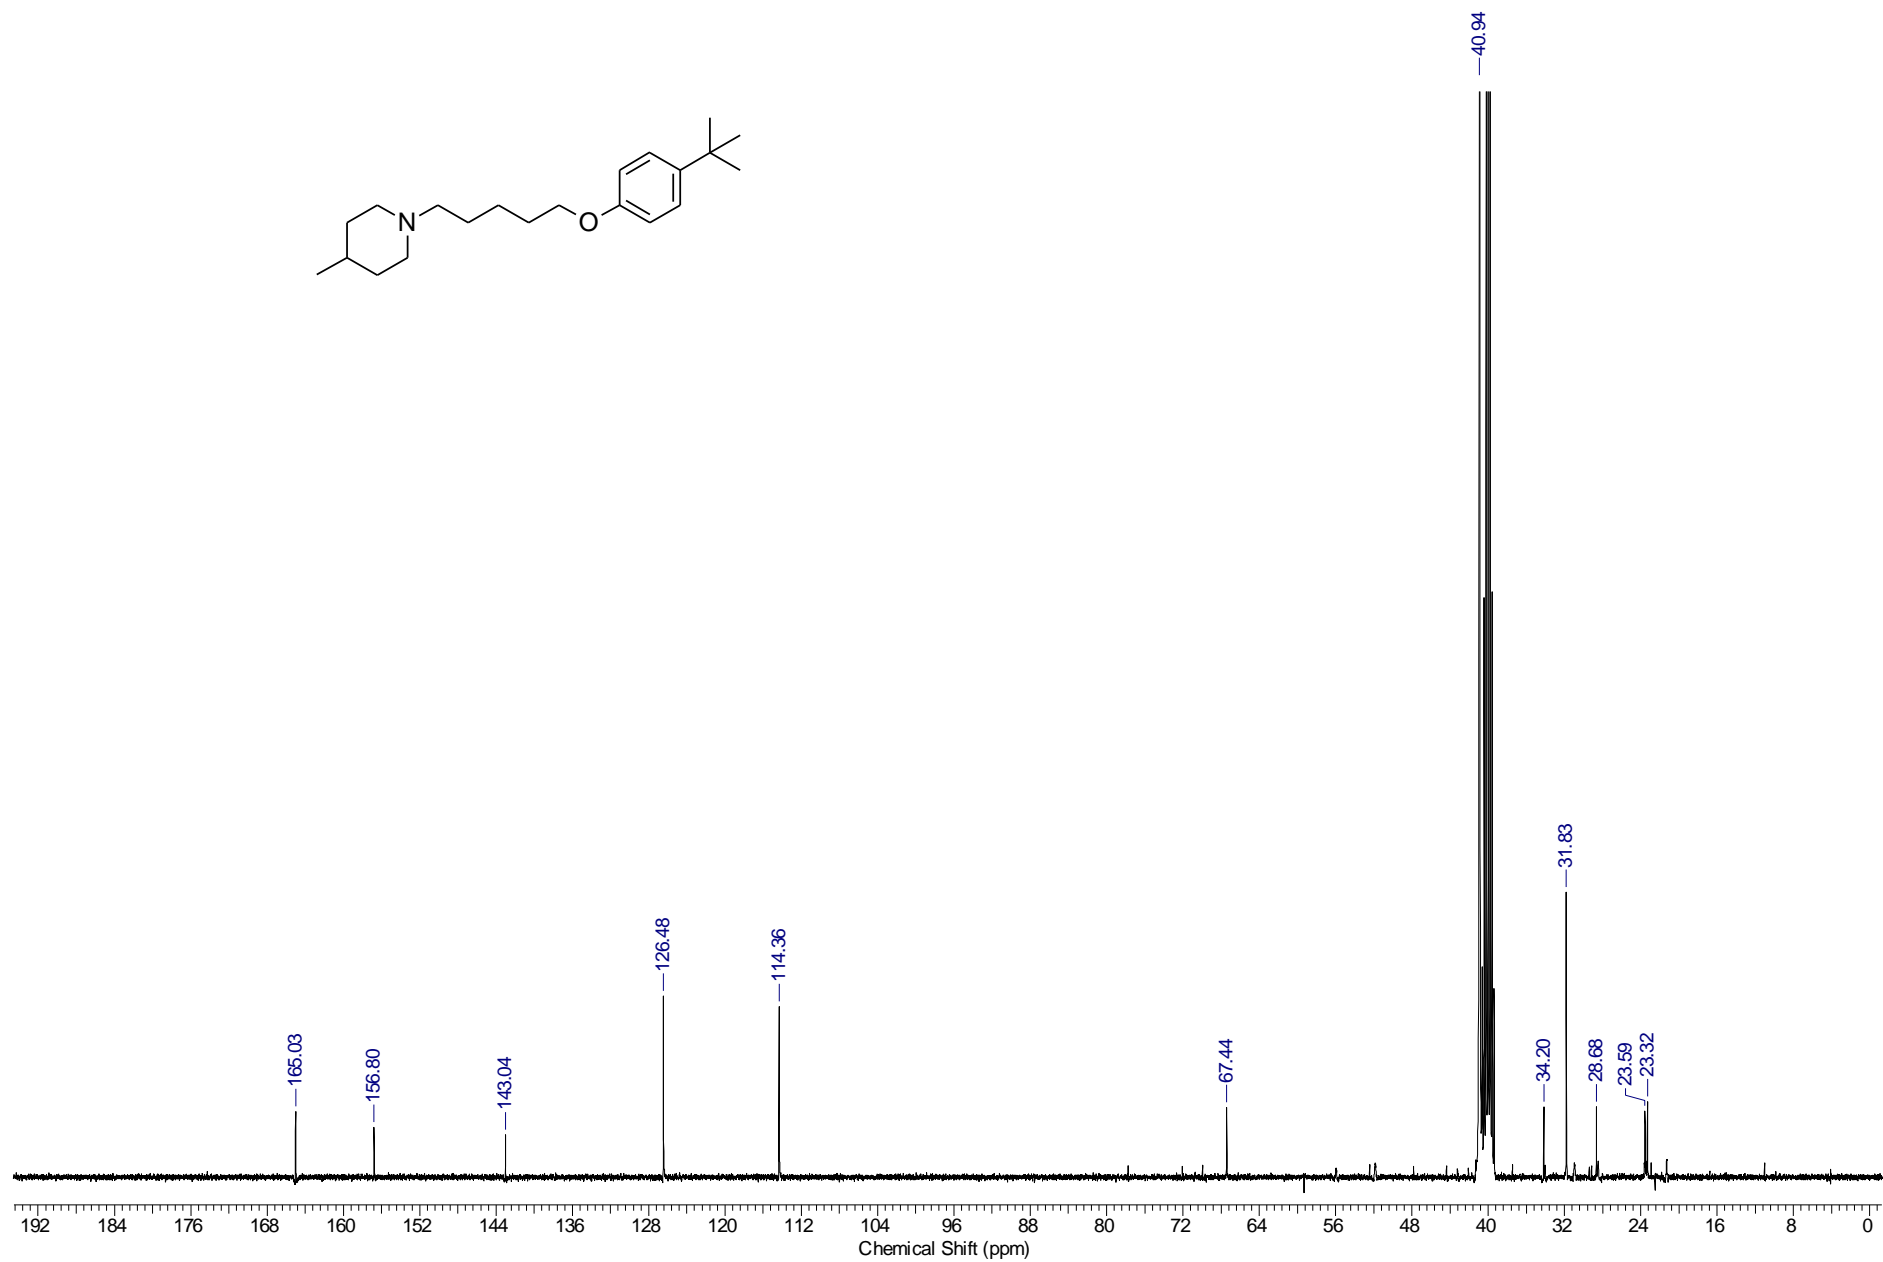

**Fig S44.** <sup>13</sup>C NMR spectrum of **26**

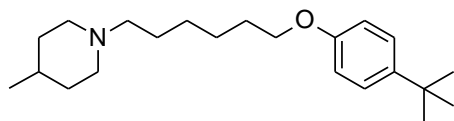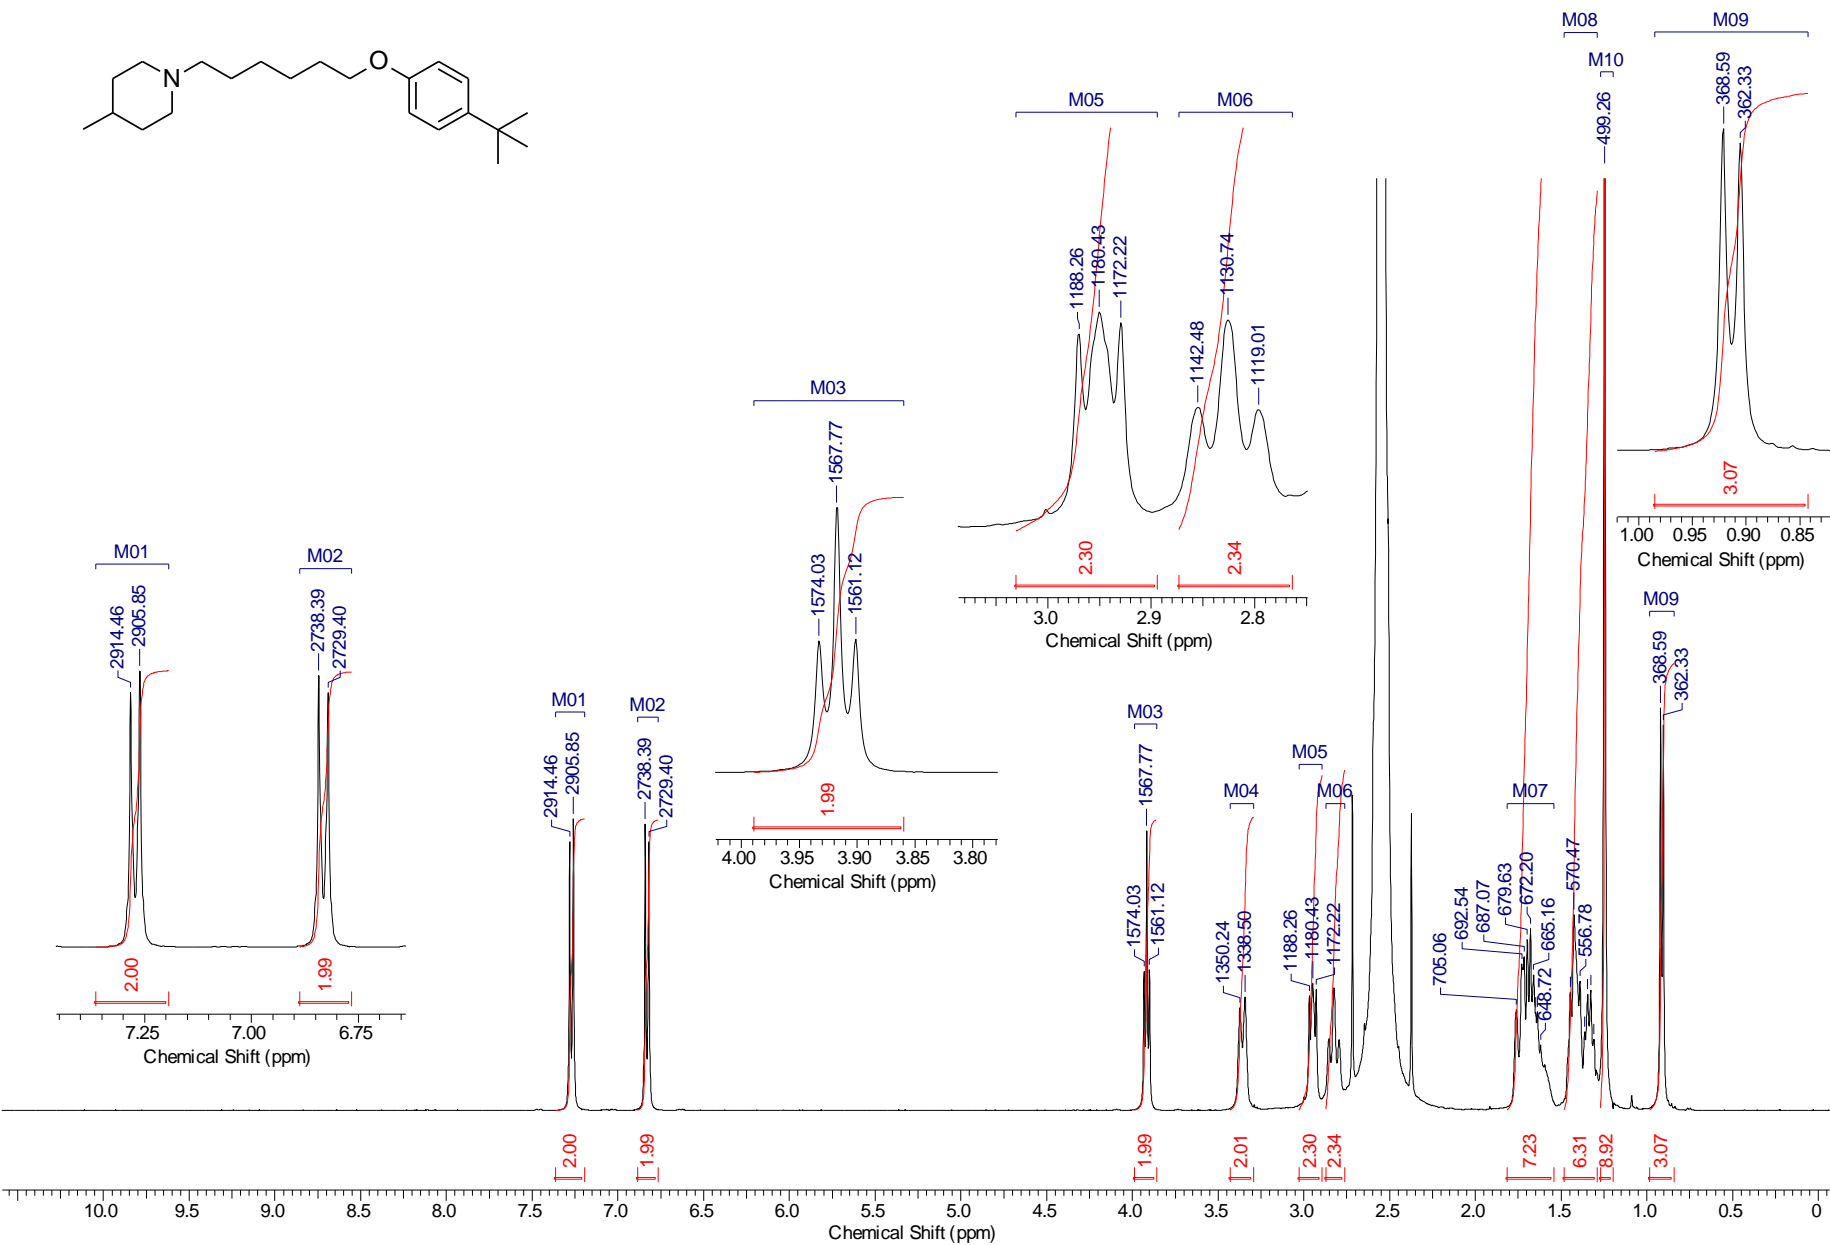

**Fig S45.**  $^1\text{H}$  NMR spectrum of **27**

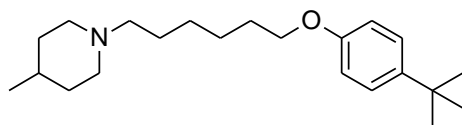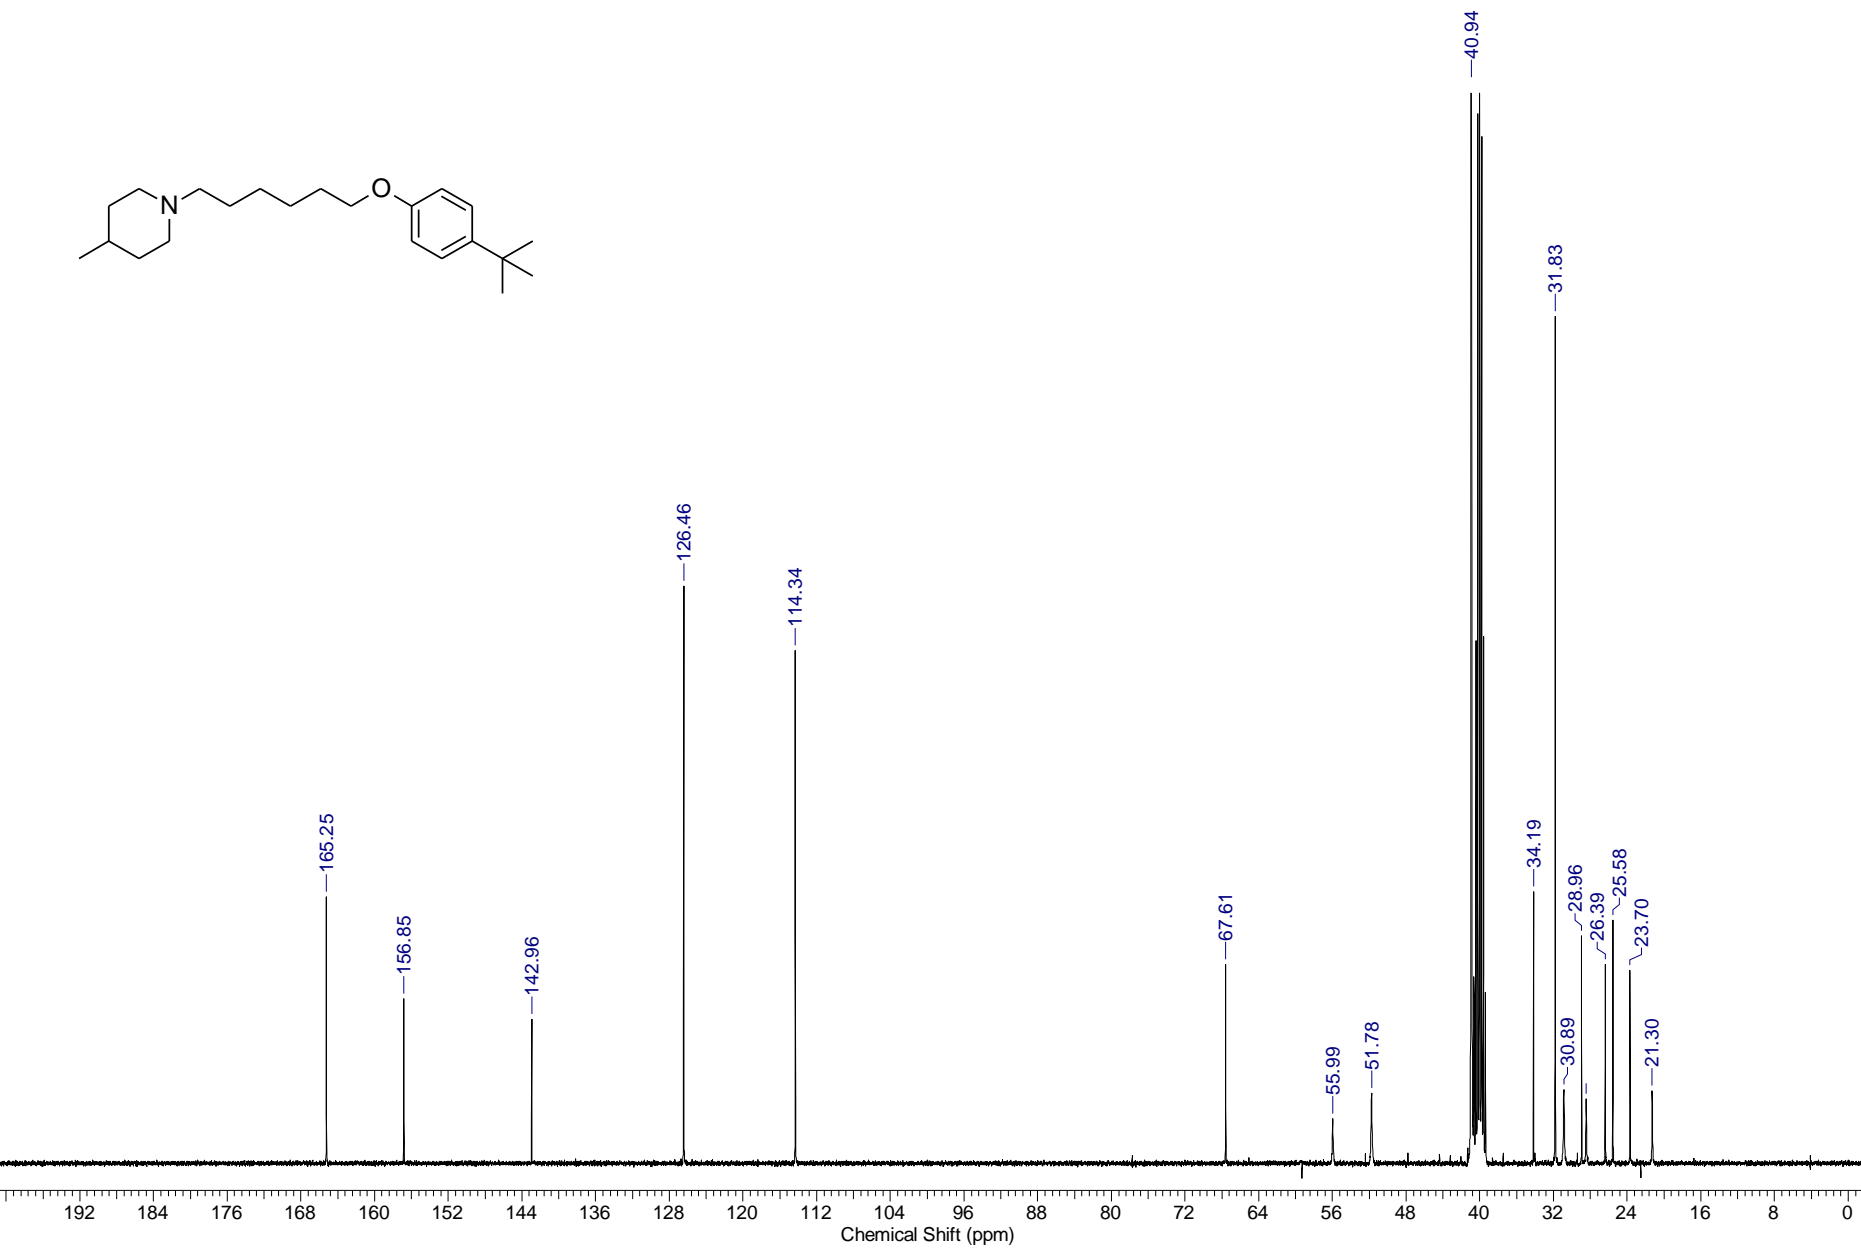

**Fig S46.** <sup>13</sup>C NMR spectrum of **27**

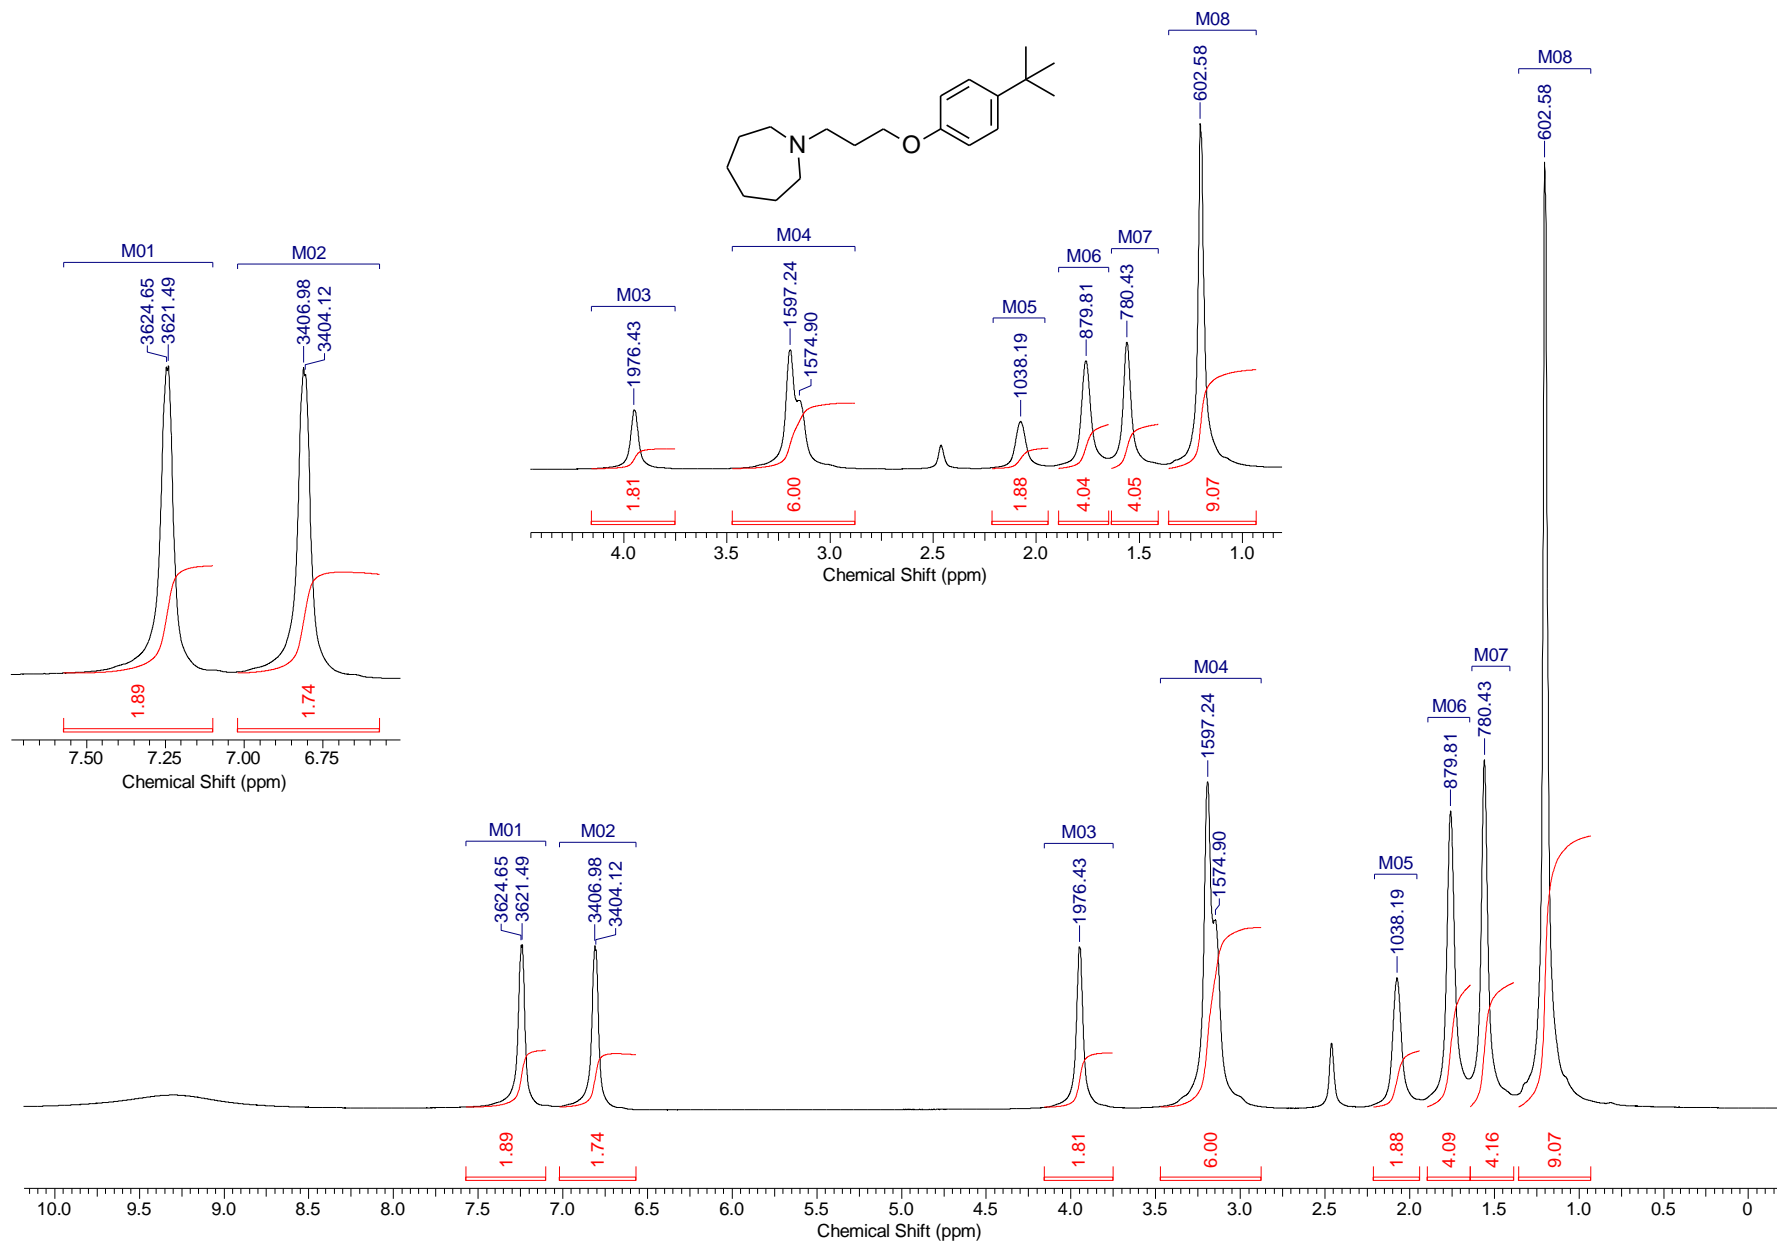

**Fig S47.**  $^1\text{H}$  NMR spectrum of **28**



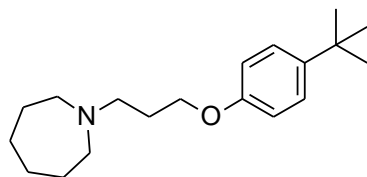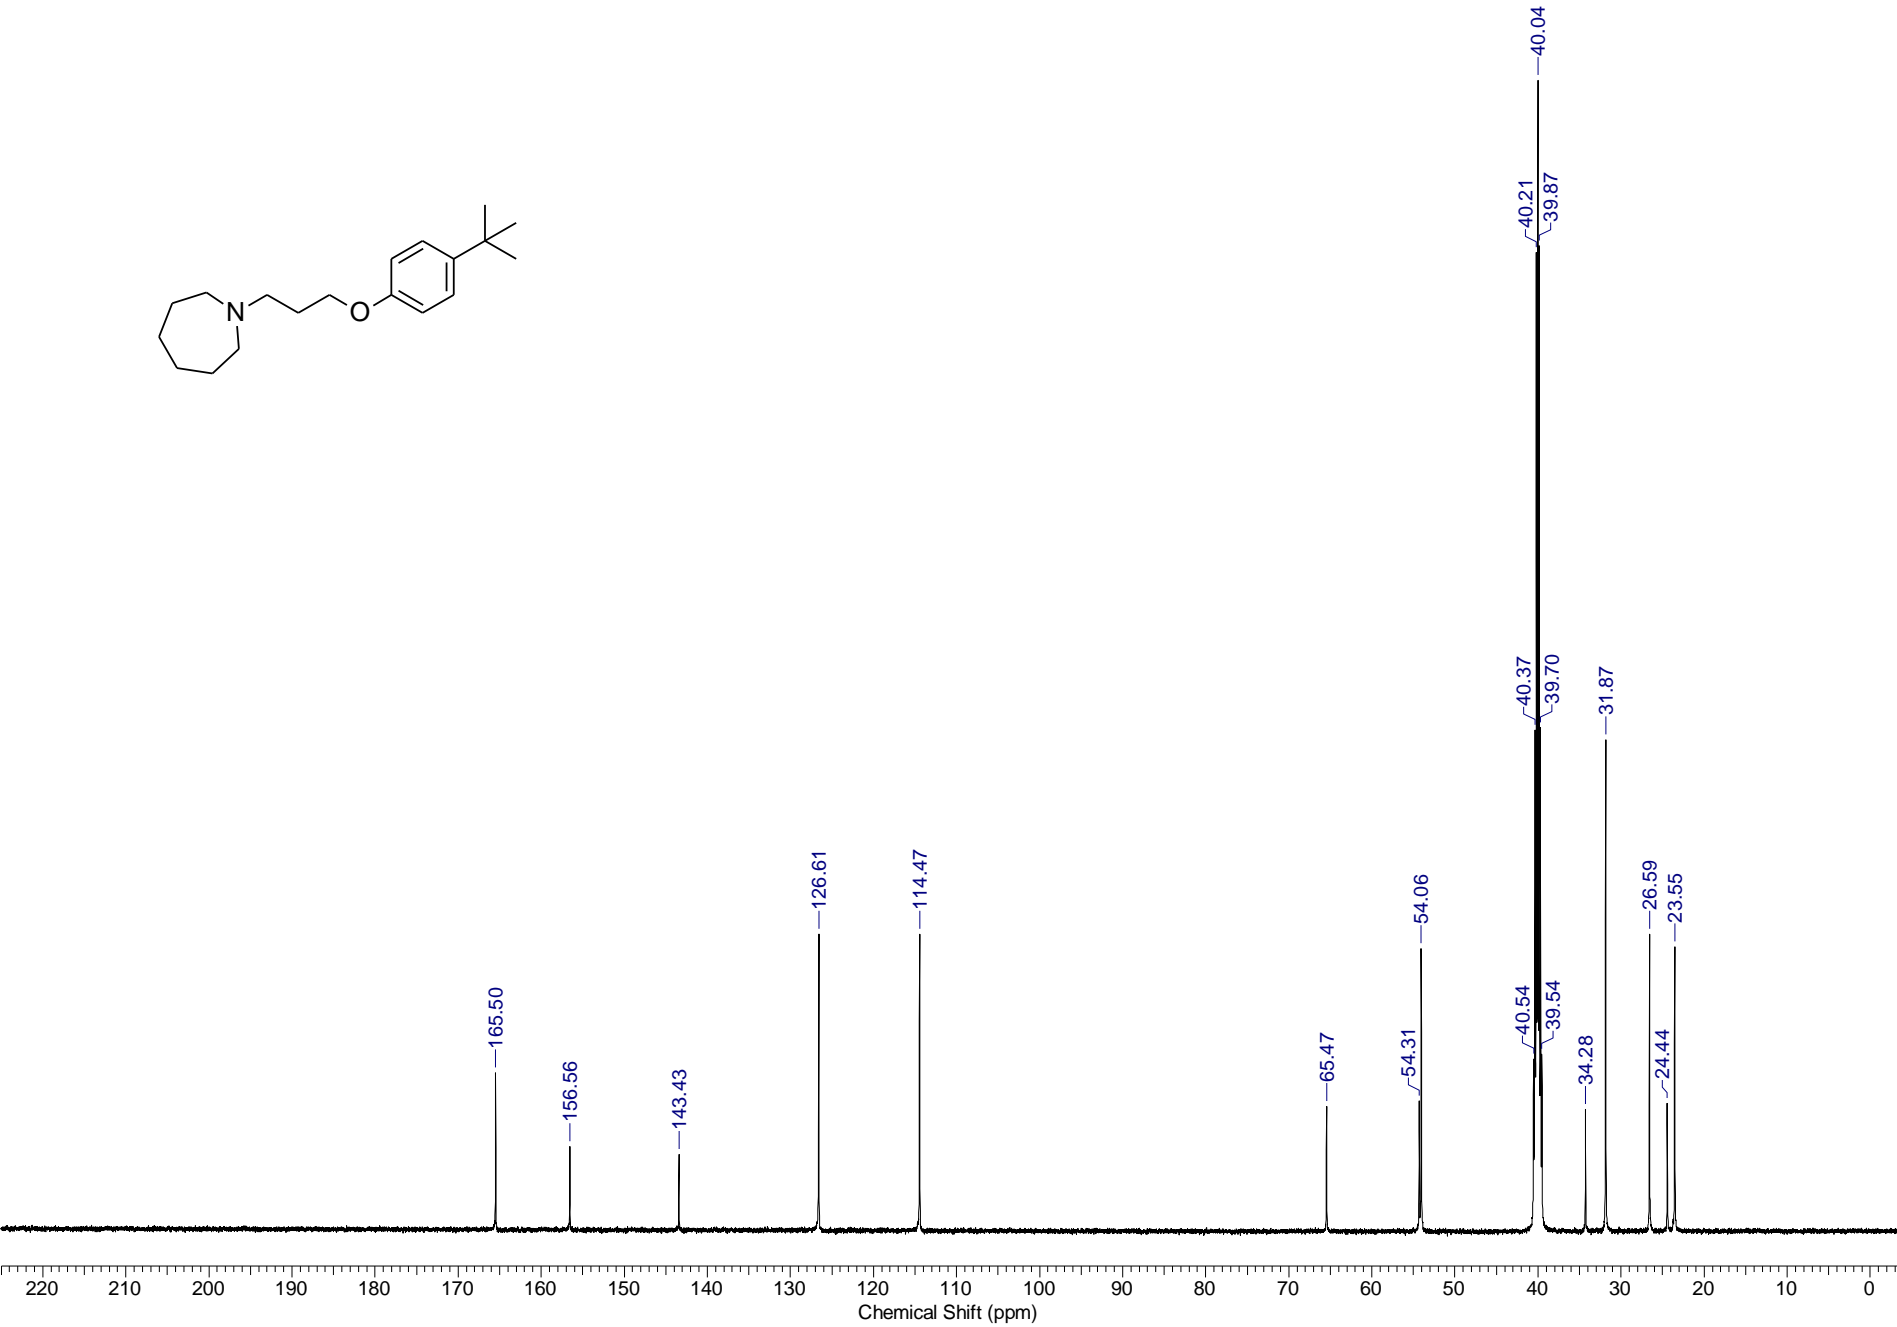

**Fig S48.** <sup>13</sup>C NMR spectrum of **28**

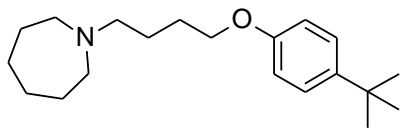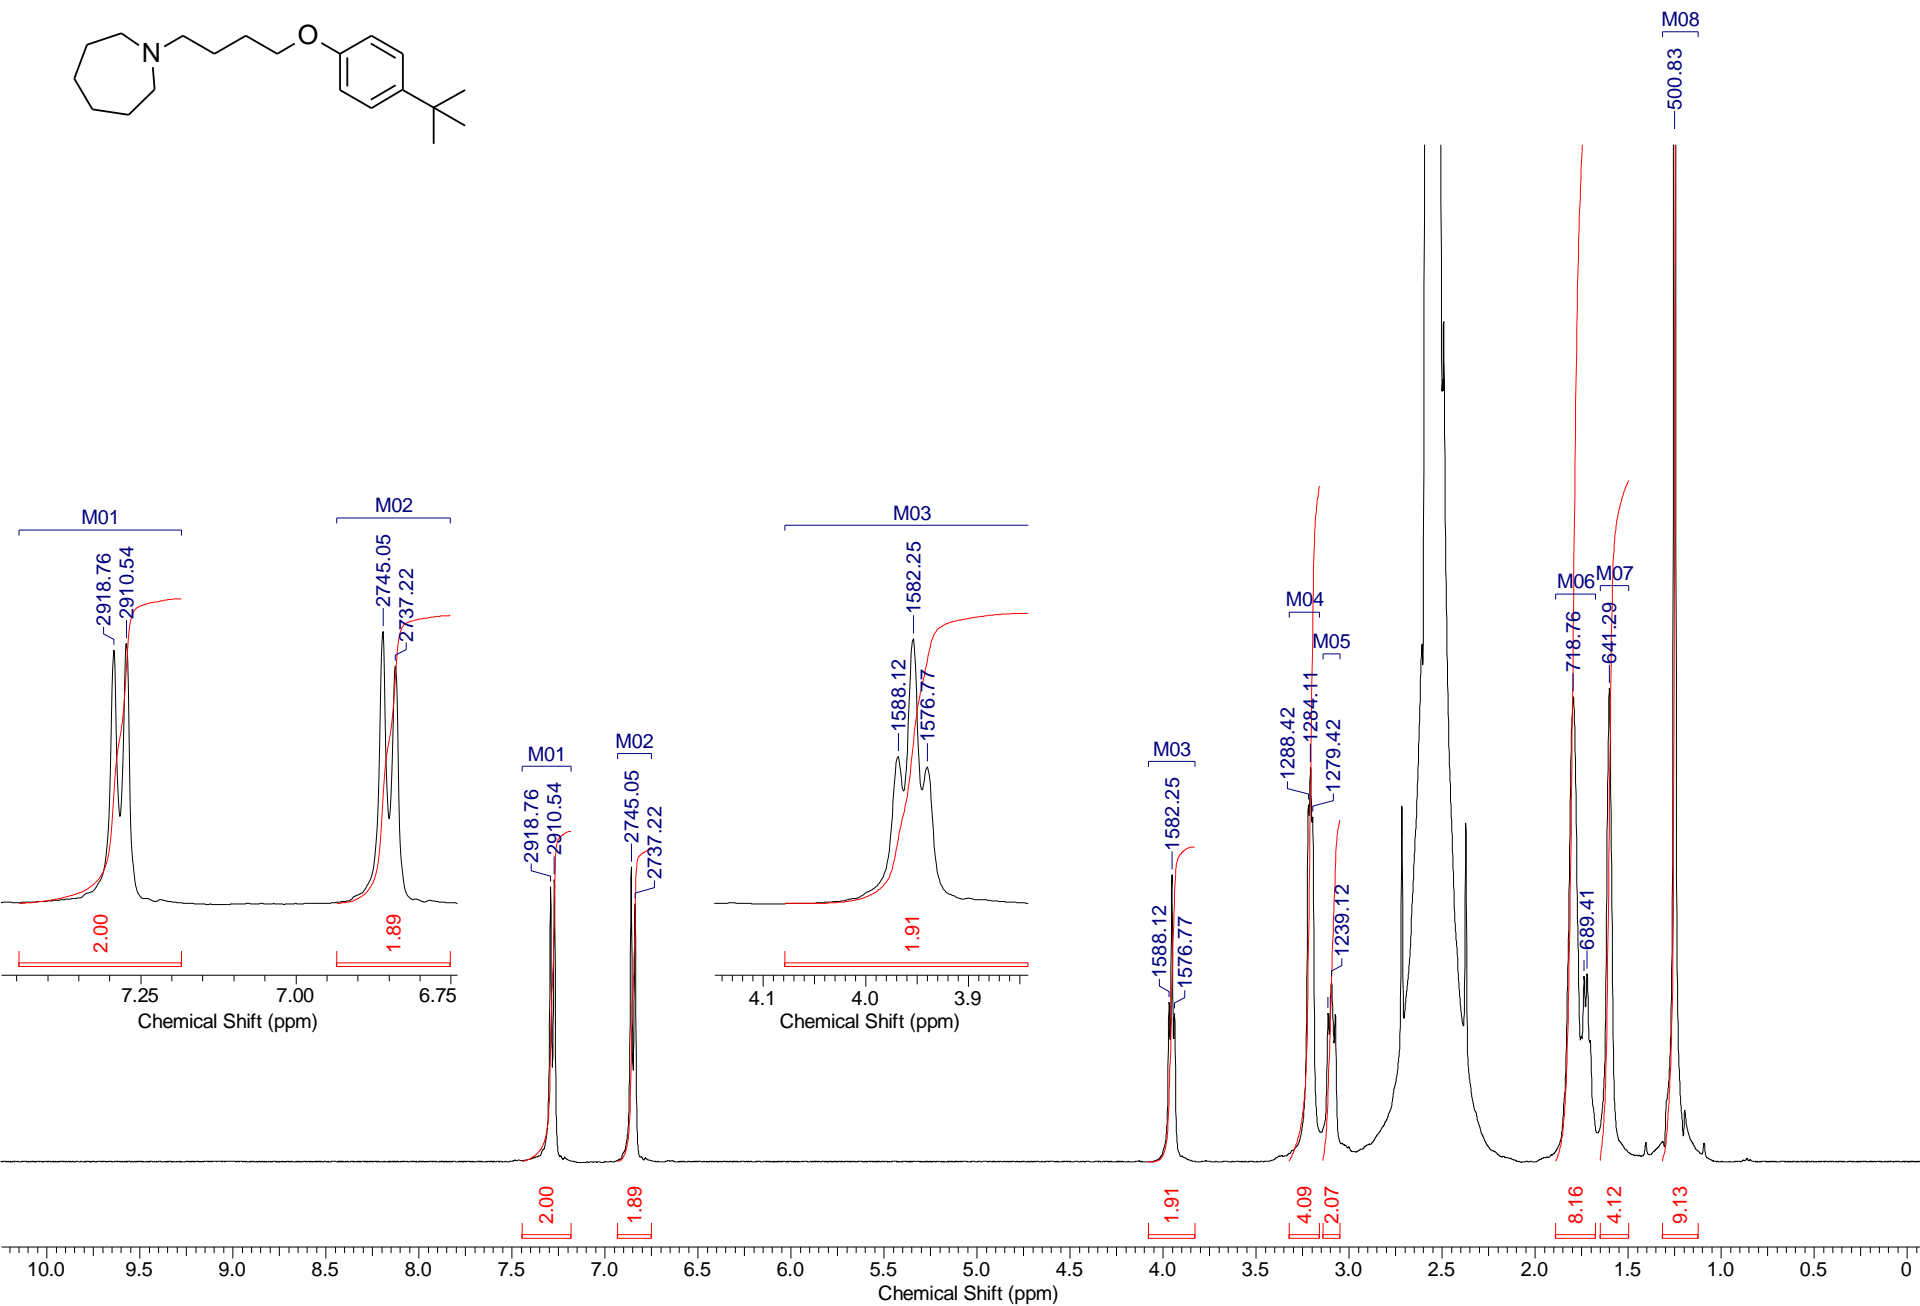

**Fig S49.**  $^1\text{H}$  NMR spectrum of **29**

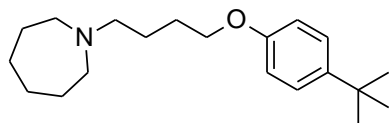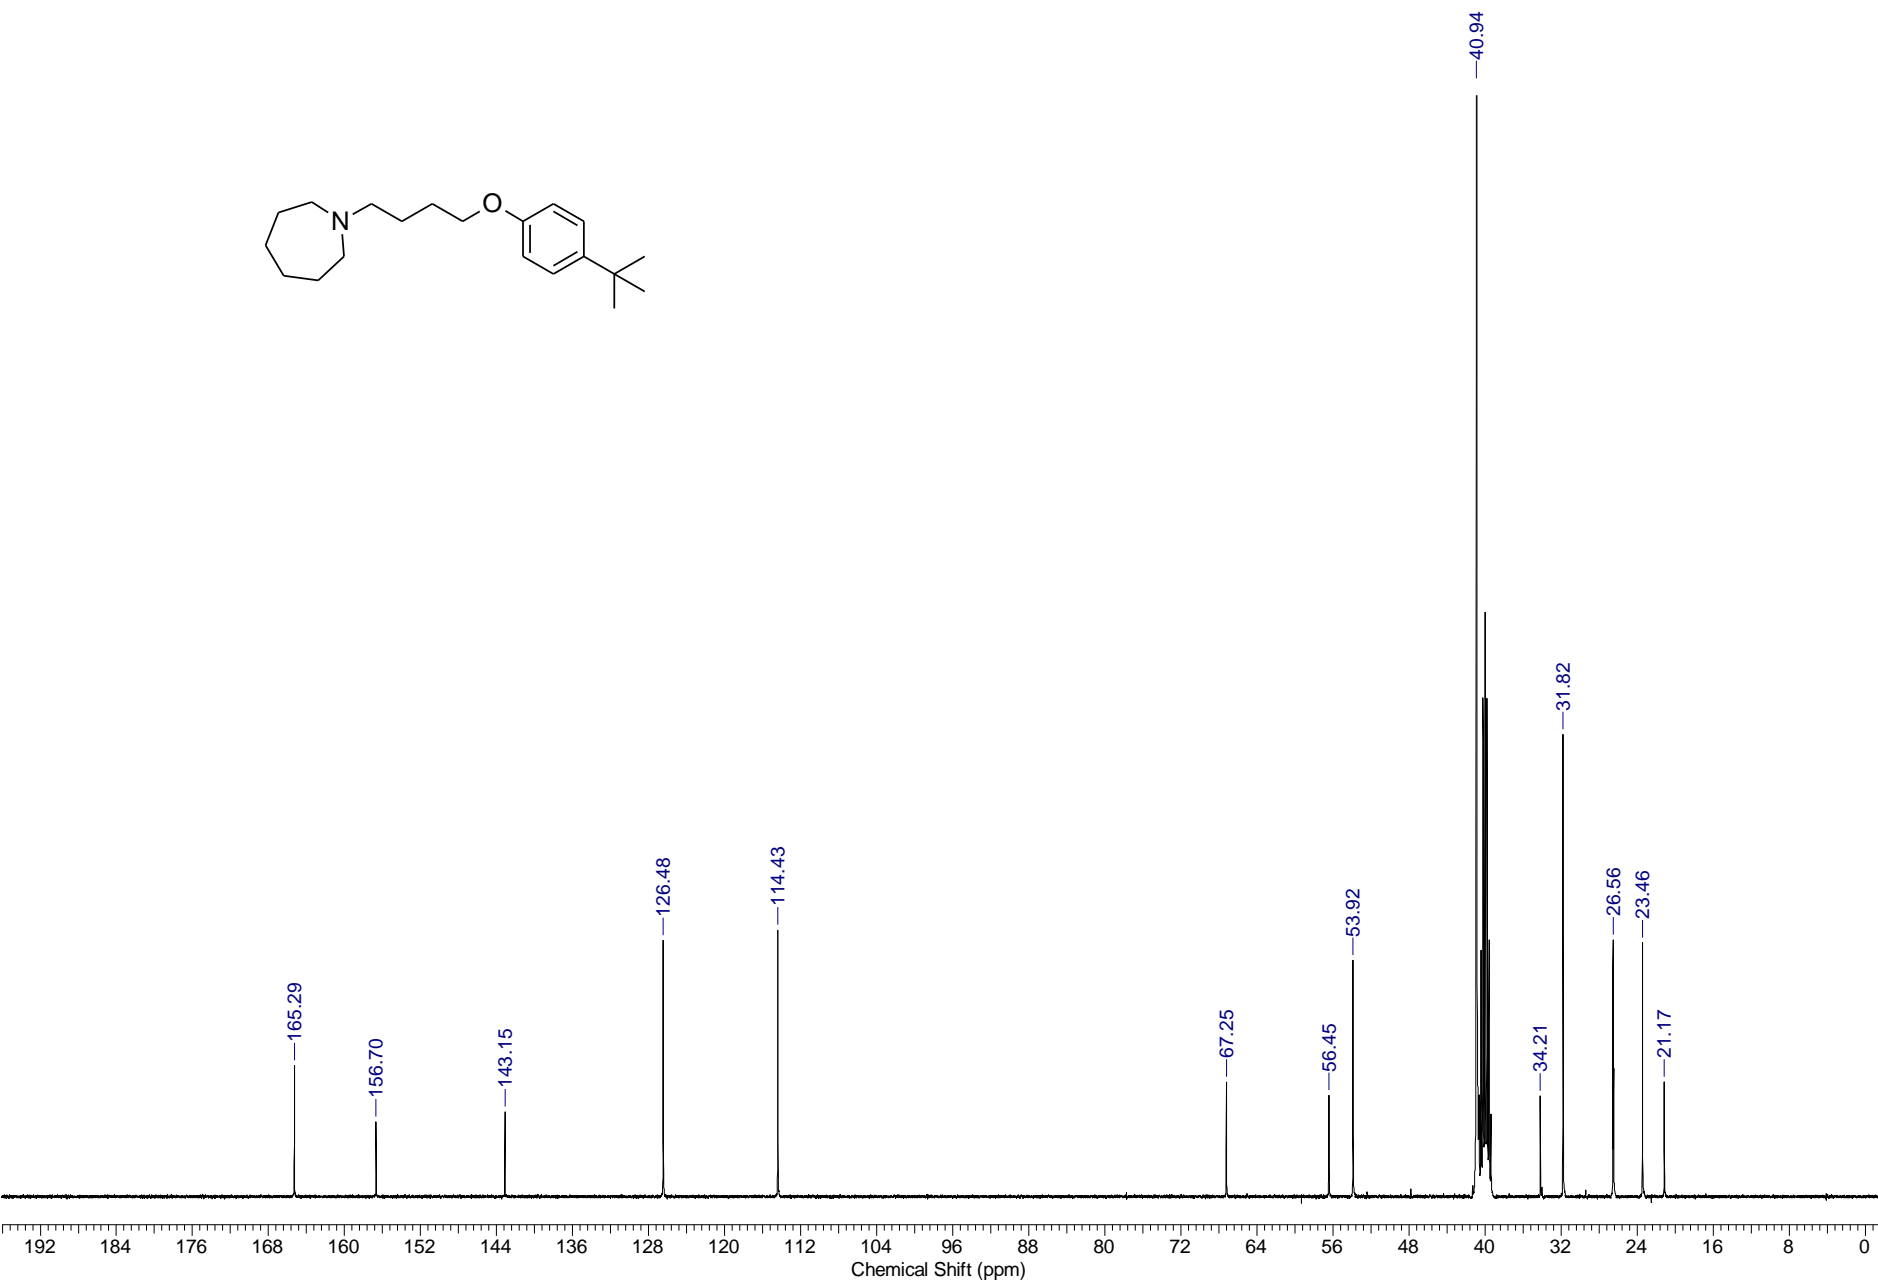

**Fig S50.** <sup>13</sup>C NMR spectrum of **29**

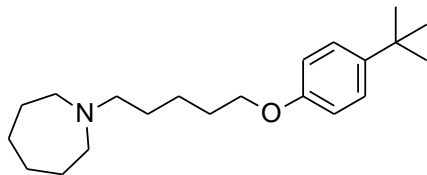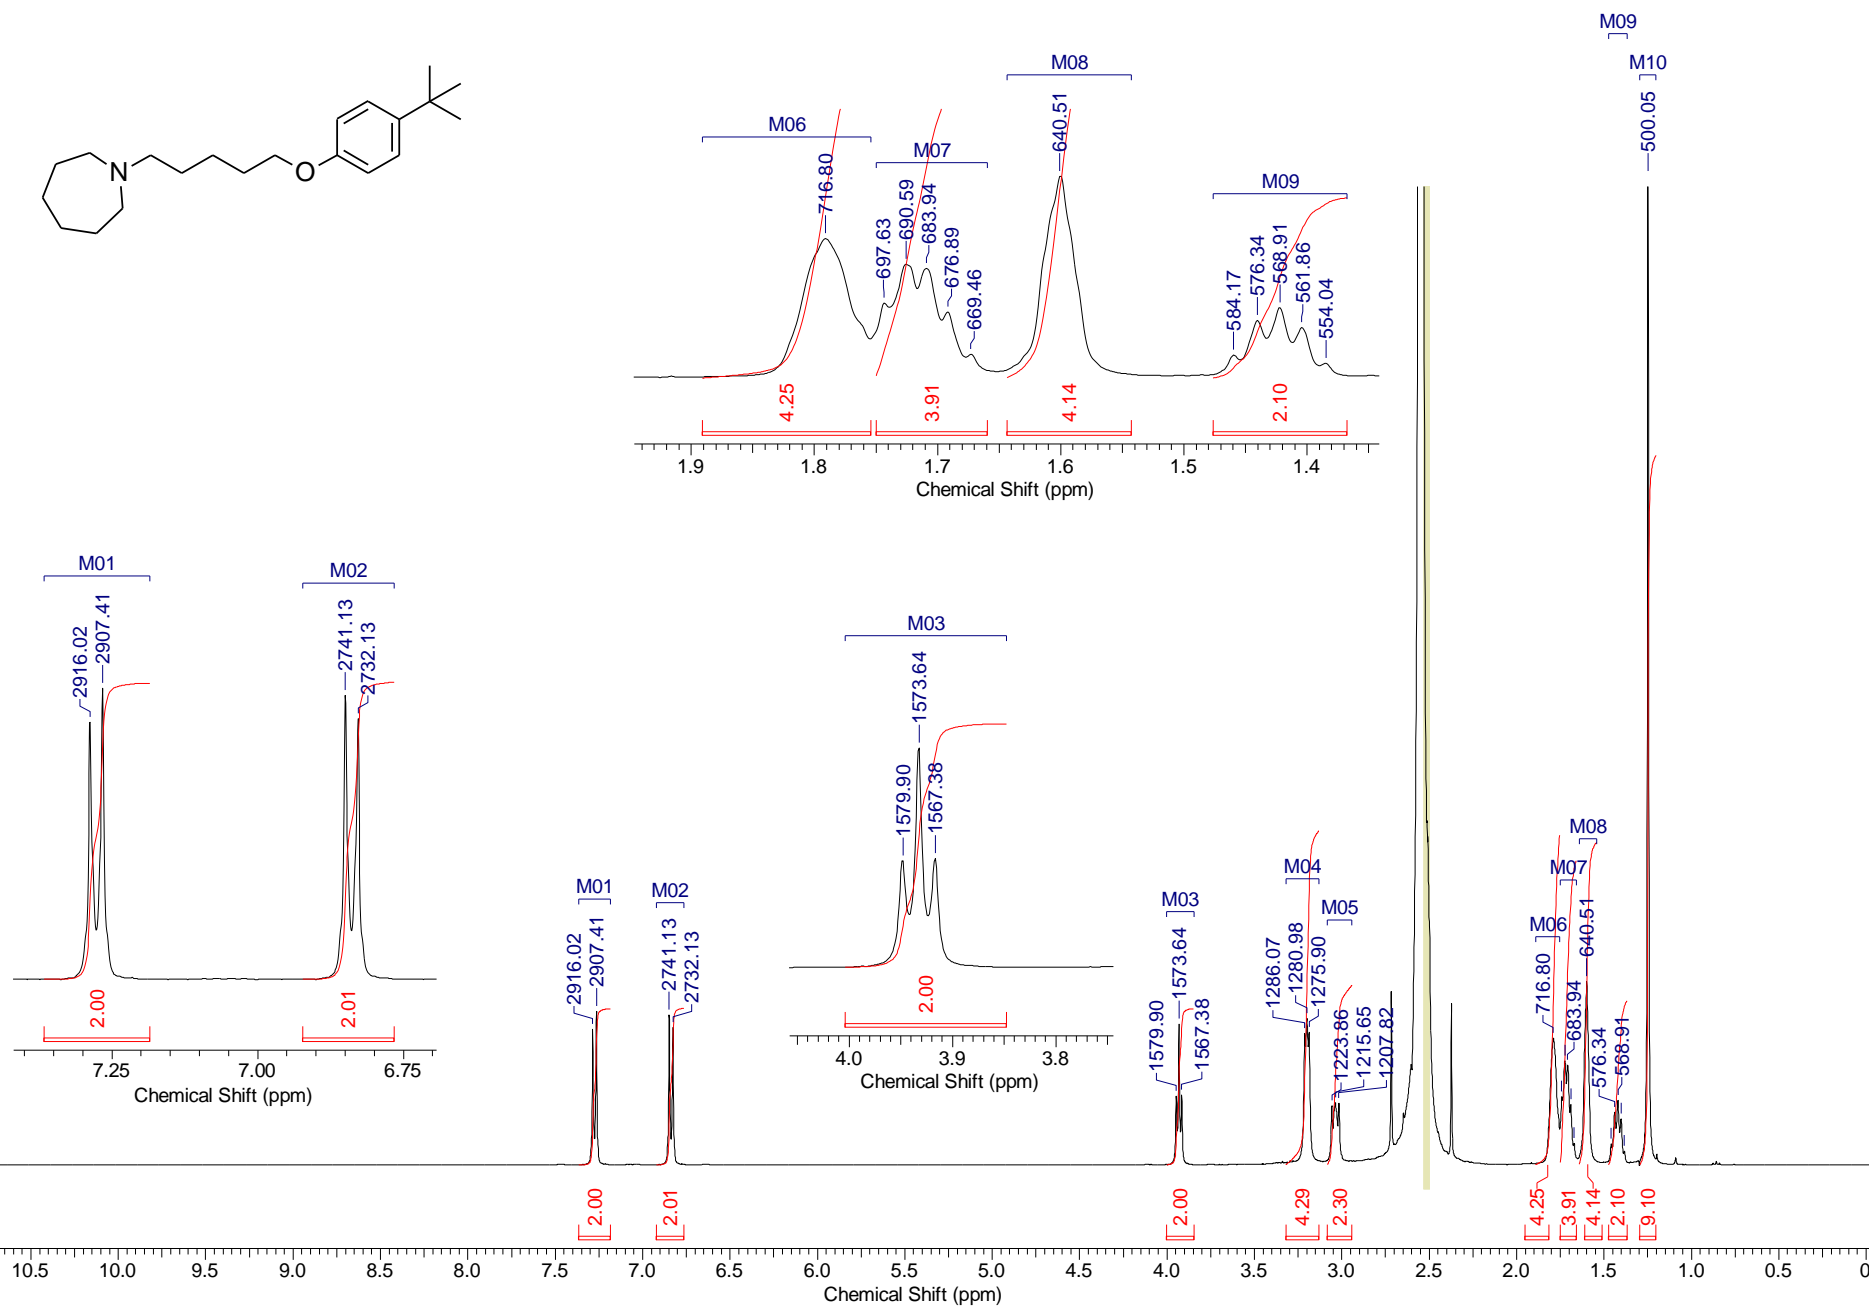

**Fig S51.**  $^1\text{H}$  NMR spectrum of **30**

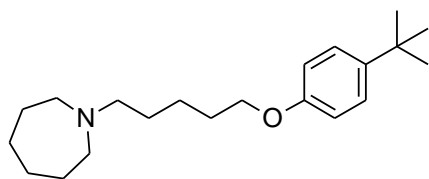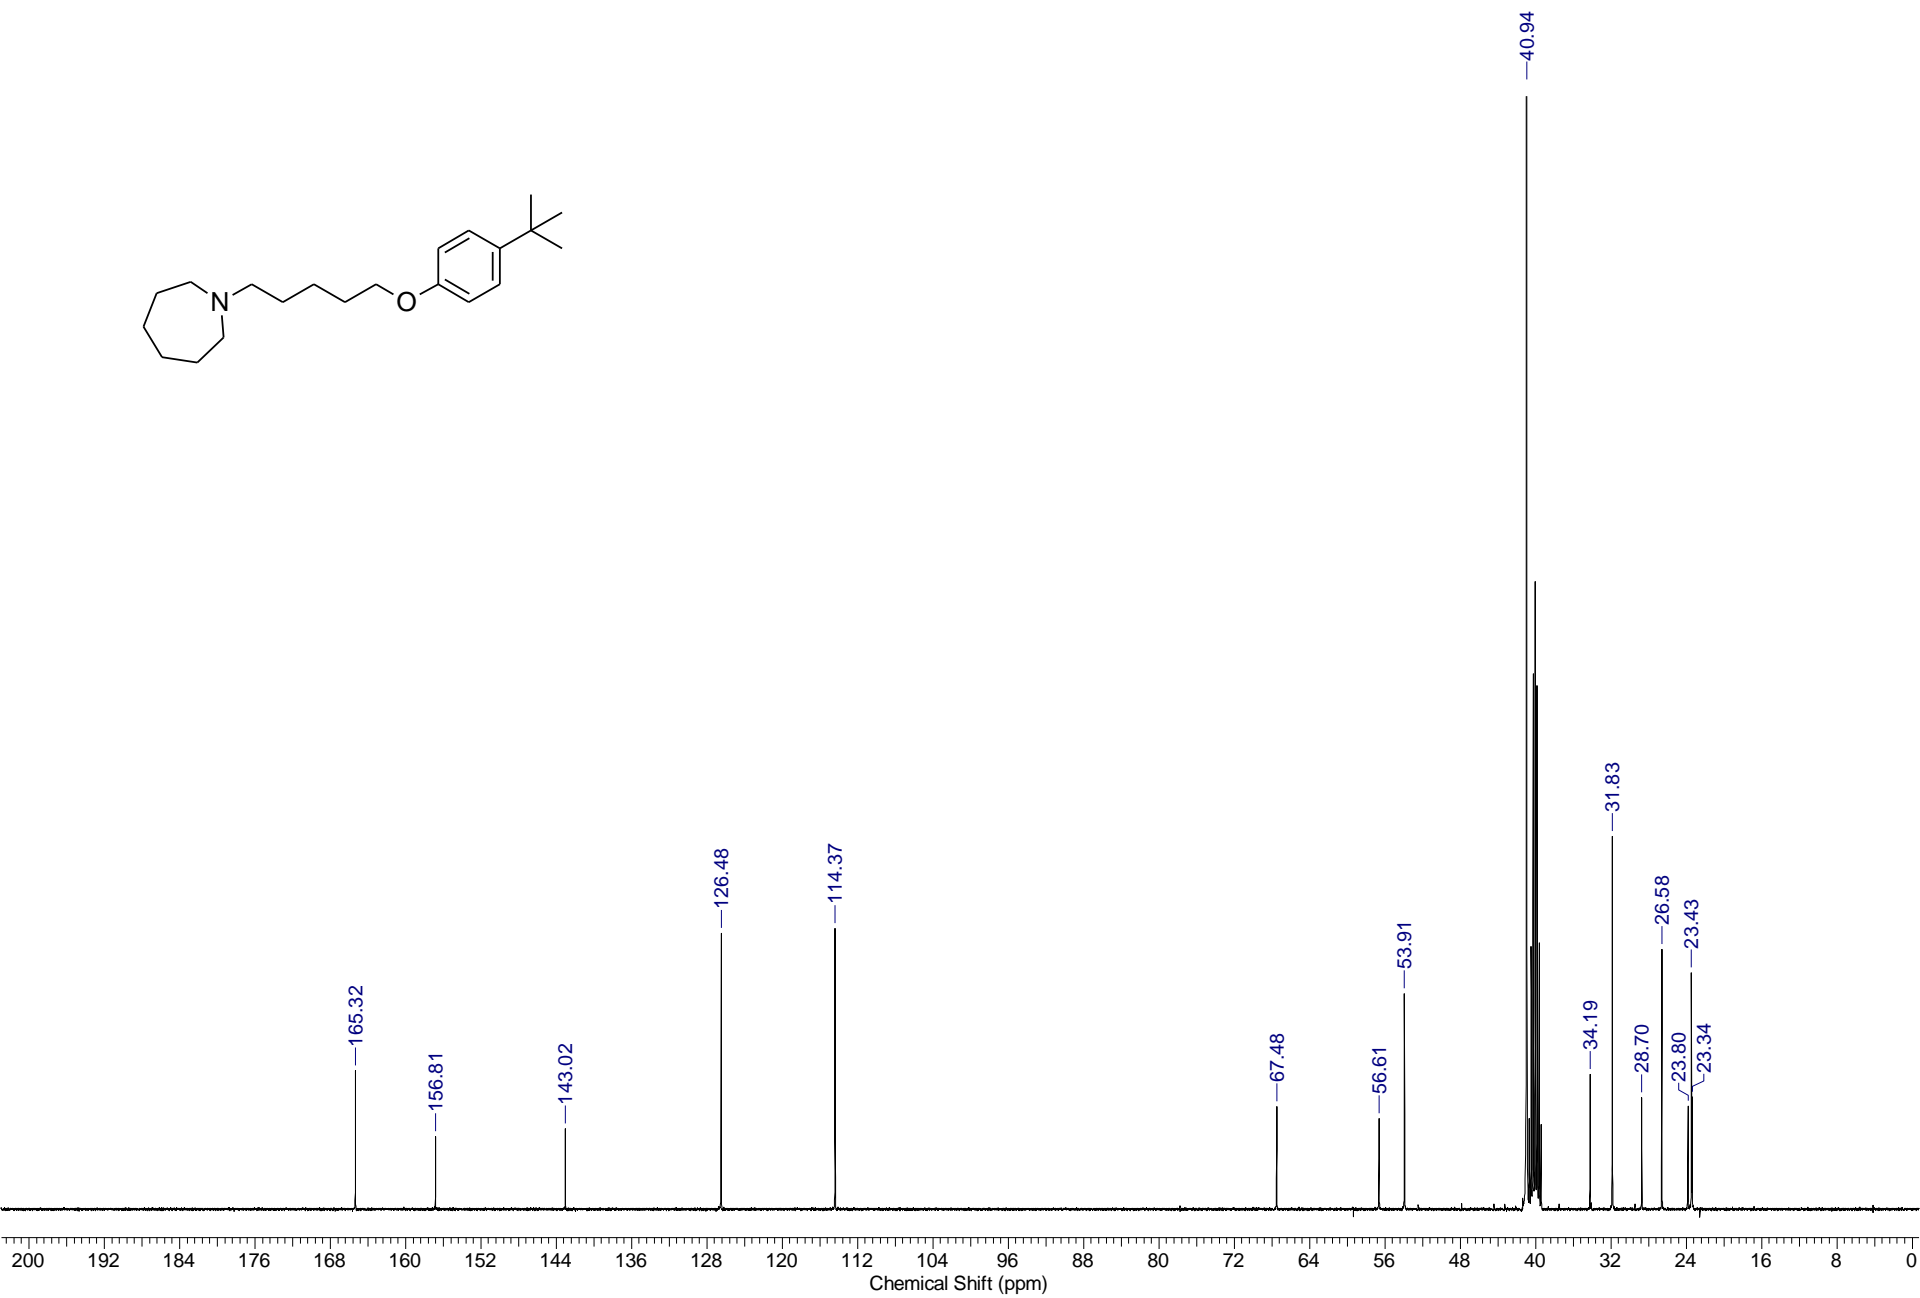

**Fig S52.** <sup>13</sup>C NMR spectrum of **30**

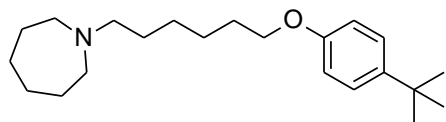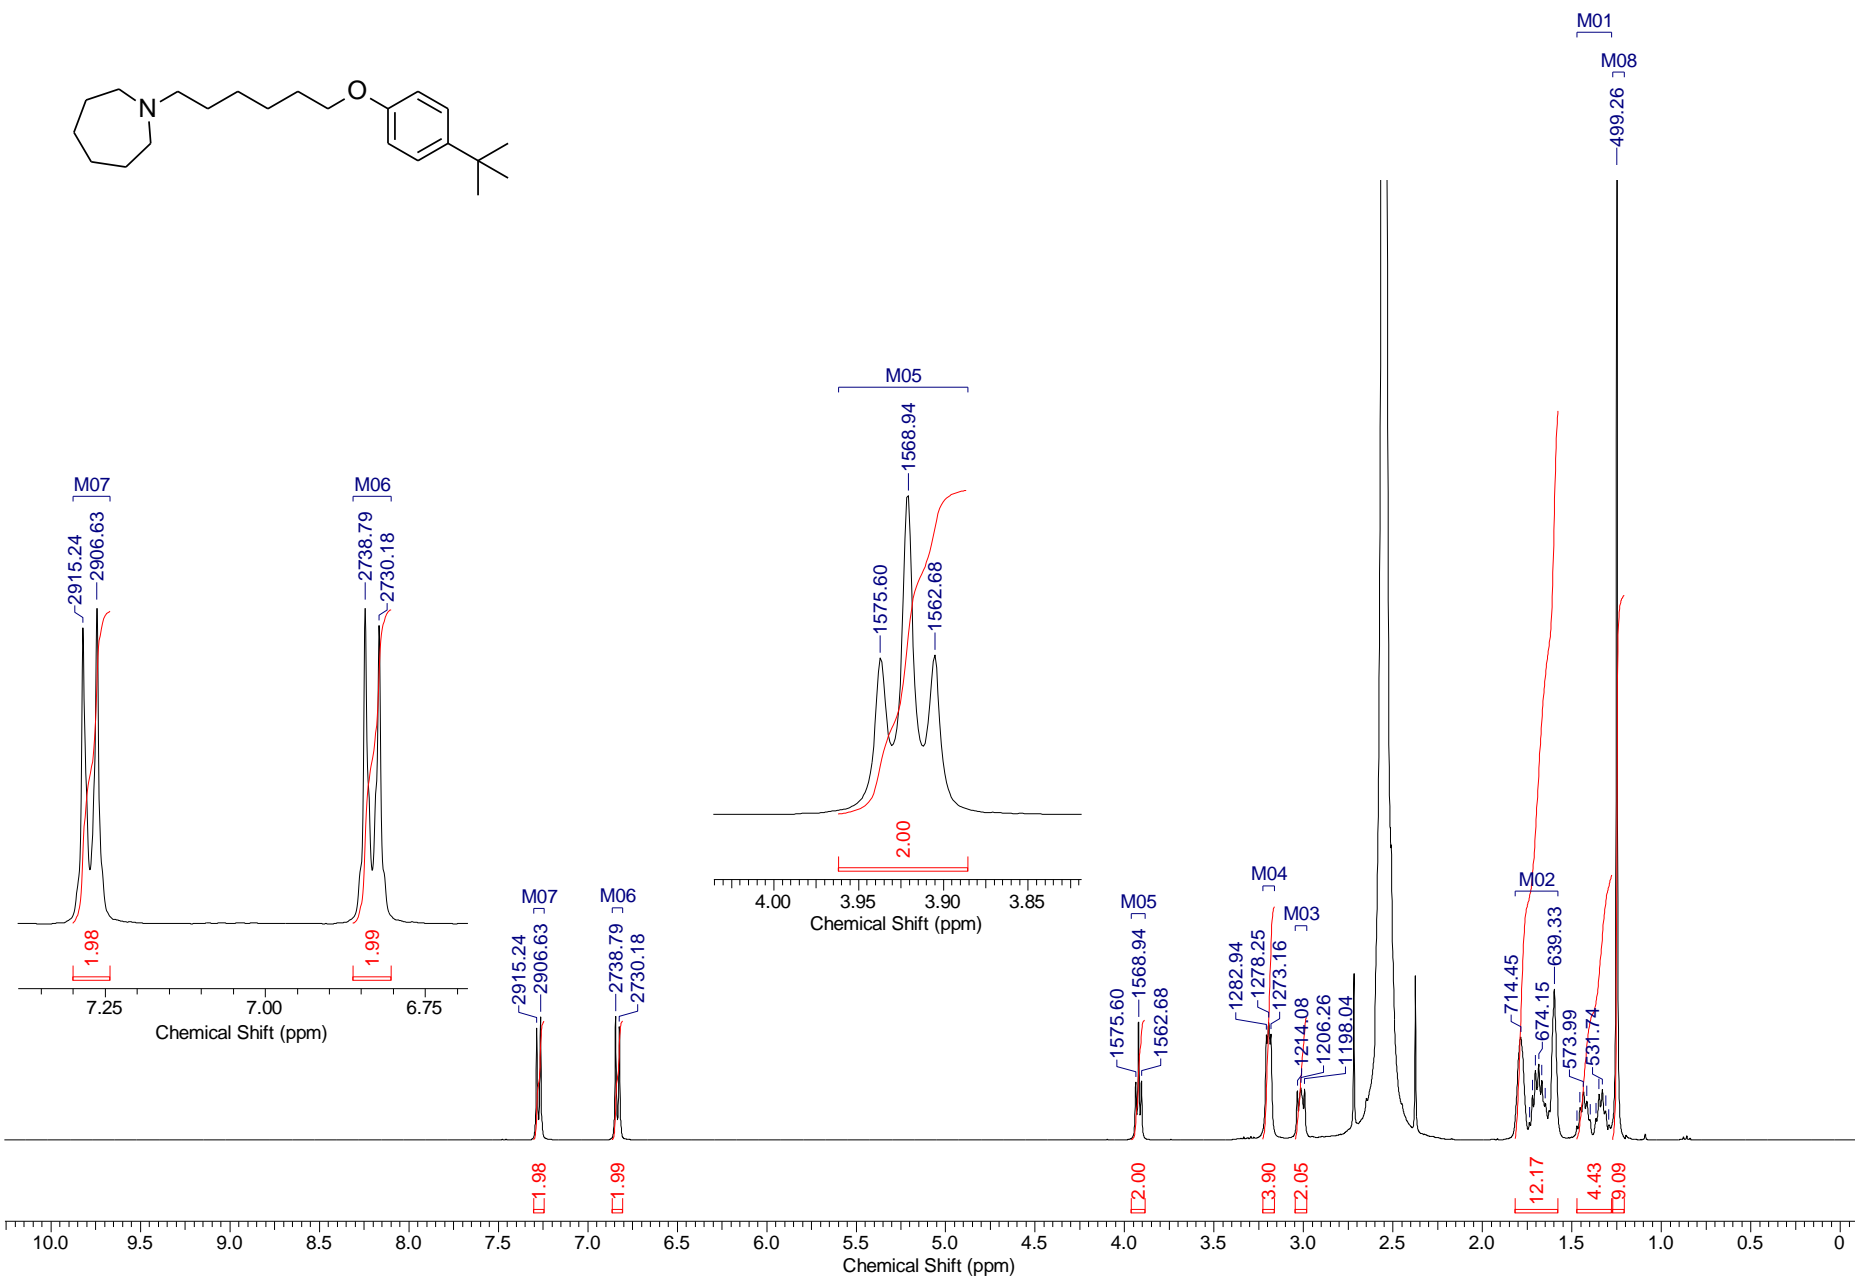

**Fig S51.**  $^1\text{H}$  NMR spectrum of **31**

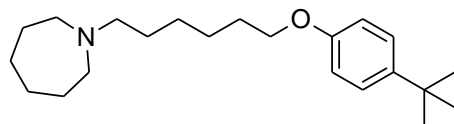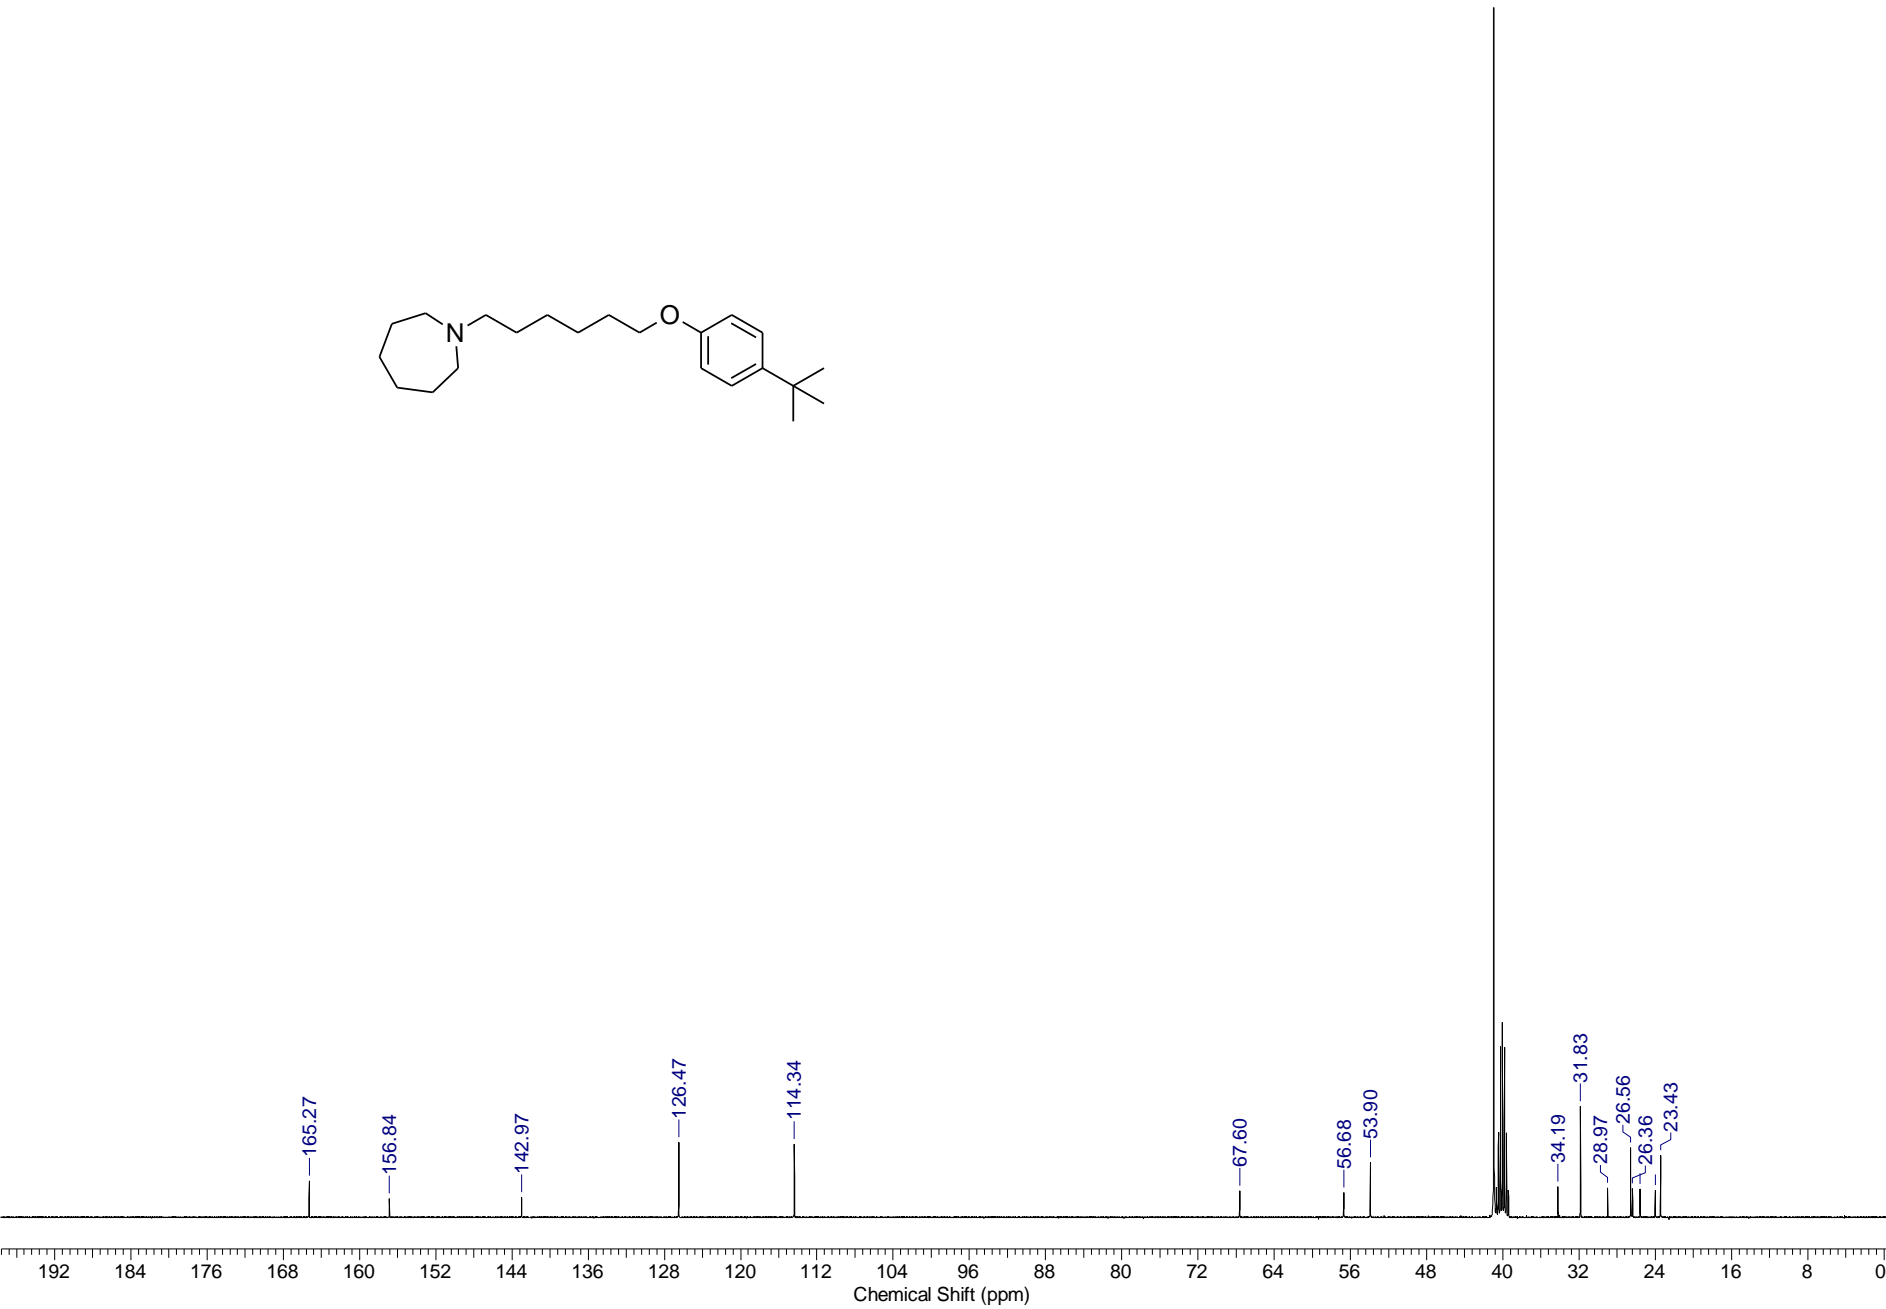

**Fig S52.** <sup>13</sup>C NMR spectrum of **31**
